# Supplementary material for: Metal-free synthesis of secondary amides using N-Boc-O-tosylhydroxylamine as nitrogen source via Beckmann rearrangement
Source: Royal Society of Chemistry journal article supplement (doi:10.1039/d2nj02755k), 2022-01-01

## Supporting Information

### Metal-free synthesis of secondary amides using *N*-Boc-*O*-tosylhydroxylamine as nitrogen source *via* Beckmann rearrangement

Jawahar L. Jat\*<sup>a</sup>, Puneet Kumar<sup>a</sup>, Saumya Verma<sup>a</sup>, Dinesh Chandra<sup>a</sup>, Vikram Singh<sup>b</sup>,  
Bhoopendra Tiwari\*<sup>b</sup>

<sup>a</sup> Department of Chemistry, Babasaheb Bhimrao Ambedkar University, Vidya Vihar, Raebareli Road, Lucknow, India, Email: jawaharlj@bbau.ac.in, jatjawahar@gmail.com

<sup>b</sup> Division of Molecular Synthesis & Drug Discovery, Centre of Biomedical Research, SGPGIMS-Campus, Raebareli Road, Lucknow, India, Email: btiwari@cbmr.res.in

#### List of Contents:

|                                                                                  |       |
|----------------------------------------------------------------------------------|-------|
| 1. General Information.....                                                      | SI-2  |
| 2. Preparation of aminating reagents.....                                        | SI-2  |
| 3. General procedure for the preparation of <i>sec</i> -amides from ketones..... | SI-2  |
| 4. Characterization data of the products.....                                    | SI-2  |
| 5. References.....                                                               | SI-14 |
| 6. <sup>1</sup> H & <sup>13</sup> C NMR Spectra of the products.....             | SI-15 |

### 1. General Information:

Unless otherwise stated, all the reactions were carried out using oven dried glassware under an open atmosphere in a round bottom flask with a magnetic stirring bar at room temperature. Ketones were used as received without further purification. The aminating reagents were also prepared by following reported literature. TLC was carried out on pre-coated plates (Merck silica gel 60, F<sub>254</sub>) and the spots were visualized with UV light or by charring the plates dipped in PMA or Ninhydrin or DNP solution. The compounds were purified by flash column chromatography using silica gel (100-200 mesh) with distilled solvents (EtOAc: Hexane) as mobile phase otherwise mentioned. <sup>1</sup>H and <sup>13</sup>C NMR spectra were recorded at 400 MHz and 100 MHz instruments respectively in CDCl<sub>3</sub> or DMSO-*d*<sub>6</sub> solvents. Chemical shifts (δ) are given in ppm. The residual solvent signals were used as references (CDCl<sub>3</sub>: δ H = 7.26 ppm, DMSO-*d*<sub>6</sub>: δ H = 2.5 ppm). The following abbreviations were used to explain NMR peak multiplicities: s = singlet, d = doublet, t = triplet, q = quartet, m = multiplet, and br s = broad signal.

**2. Preparation of aminating reagents:** Aminatings **2a**,<sup>1</sup> **2b**,<sup>2</sup> **2c**<sup>3</sup> and **2d**<sup>4</sup> were prepared according to reported procedures.

**3. General procedure for preparation of *sec*-amides from ketones:** To a stirring solution of ketones (0.5 mmol, 1.0 equiv.) in TFE (0.5 mL) at room temperature in an open round bottom flask, aminating agent (0.75 mmol, 1.5 equiv.) was added. The reaction mixture was stirred at a specified temperature and duration as indicated in Scheme 2. After completion, the reaction mixture was diluted with ethyl acetate (10 mL) and washed with a saturated aqueous solution of NaHCO<sub>3</sub> (3×5 mL). The organic layer was washed with brine solution (5 mL) and dried over anhydrous Na<sub>2</sub>SO<sub>4</sub>. The crude product was obtained after the removal of all volatiles in vacuo and was washed with *n*-hexane to remove some minor non-polar impurities (for 3a-d, 3g, 3k-n and 3r) or passed through a plug of silica gel using ethyl acetate and hexane as eluent to get pure amides.

### 4. Characterization data of the products:

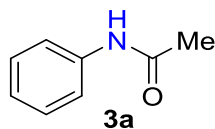

**N-Phenylacetamide (3a):** Prepared according to general procedure and titled amide was isolated as white solid (65 mg, 95% yield; mp 113–115 °C) whose spectral data was consistent with the literature values.<sup>5</sup>

<sup>1</sup>H NMR (400 MHz, CDCl<sub>3</sub>) δ 7.50 (d, *J* = 8.0 Hz, 2H), 7.31 (t, *J* = 7.7 Hz, 2H), 7.10 (t, *J* = 7.3 Hz, 1H), 2.16 (s, 3H).

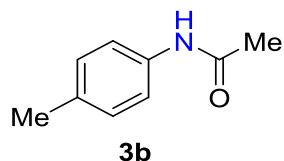

**N-(p-Tolyl)acetamide (3b):** Prepared according to general procedure and titled amide was isolated as white solid (67 mg, 90% yield; mp 151–152 °C) whose spectral data was consistent with the literature values.<sup>5</sup>

<sup>1</sup>H NMR (400 MHz, CDCl<sub>3</sub>) δ 7.37 (d, *J* = 8.1 Hz, 2H), 7.20 (br s, 1H), 7.11 (d, *J* = 8.1 Hz, 2H), 2.31 (s, 3H), 2.16 (s, 3H).

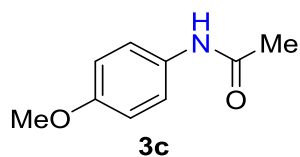

**N-(4-Methoxyphenyl)acetamide (3c):** Prepared according to general procedure and titled amide was isolated as white solid (79 mg, 95% yield; mp = 130–132°C) whose spectral data was consistent with the literature values.<sup>5</sup>

<sup>1</sup>H NMR (400 MHz, CDCl<sub>3</sub>) δ 8.00 (d, *J* = 8.5 Hz, 2H), 7.59 (d, *J* = 8.3 Hz, 2H), 7.48 (br s, 1H), 3.90 (s, 3H), 2.21 (s, 3H).

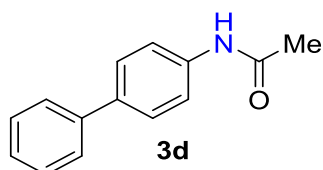

**N-([1,1'-biphenyl]-4-yl)acetamide (3d):** Prepared according to general procedure and titled amide was isolated as white solid (95 mg, 90% yield; mp = 170–172 °C) whose spectral data was consistent with the literature values.<sup>6</sup>

<sup>1</sup>H NMR (400 MHz, CDCl<sub>3</sub>) δ 7.81 (s, 1H), 7.65 – 7.49 (m, 6H), 7.42 (t, *J* = 7.3 Hz, 2H), 7.37 – 7.29 (m, 1H), 2.19 (s, 3H).

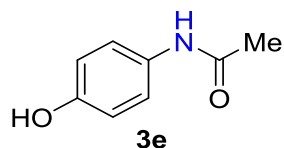

***N*-(4-Hydroxyphenyl)acetamide (3e):** Prepared according to general procedure and crude was purified by silica gel column chromatography (hexane/ethyl acetate = 1:1, v/v) afforded the titled amide as brown solid (65 mg, 86% yield; mp 169–170 °C), whose spectral data was consistent with the literature values.<sup>5</sup>

<sup>1</sup>H NMR (400 MHz, DMSO-*d*<sub>6</sub>) δ 9.64 (s, 1H), 9.13 (s, 1H), 7.33 (d, *J* = 8.7 Hz, 2H), 6.66 (d, *J* = 8.7 Hz, 2H), 1.97 (s, 3H).

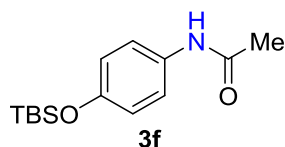

***N*-(4-((*tert*-butyldimethylsilyloxy)phenyl)acetamide (3f):** Prepared according to general procedure and crude was purified by silica gel column chromatography (hexane/ethyl acetate = 3:1, v/v) afforded the titled amide as white solid (120 mg, 90% yield; mp = 120–122 °C) whose spectral data was consistent with the literature values.<sup>7</sup>

<sup>1</sup>H NMR (400 MHz, CDCl<sub>3</sub>) δ 7.65 (br s, 1H), 7.32 (d, *J* = 7.1 Hz, 2H), 6.75 (d, *J* = 7.1 Hz, 2H), 2.10 (s, 3H), 0.95 (s, 9H), 0.15 (s, 6H).

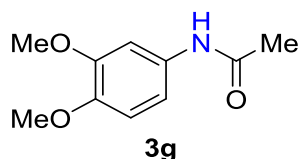

***N*-(3,4-Dimethoxyphenyl)acetamide (3g):** Prepared according to general procedure and titled amide was isolated as white solid (87 mg, 89% yield; mp 125–128 °C) whose spectral data was consistent with the literature values.<sup>8</sup>

<sup>1</sup>H NMR (400 MHz, CDCl<sub>3</sub>) δ 7.30 (d, *J* = 1.9 Hz, 1H), 7.17 (br s, 1H), 6.88-6.76 (m, 2H), 3.87 (s, 3H), 3.85 (s, 3H), 2.16 (s, 3H).

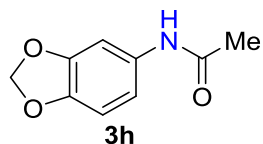

***N*-(benzo[*d*][1,3]dioxol-5-yl)acetamide (3h):** Prepared according to general procedure and crude was purified by silica gel column chromatography (hexane/ethyl acetate = 4:1, v/v) afforded the titled amide as white solid (86 mg, 96% yield; mp = 92–95 °C) whose spectral data was consistent with the literature values.<sup>9</sup>

<sup>1</sup>H NMR (400 MHz, CDCl<sub>3</sub>) δ 7.64 (br s, 1H), 7.17 (d, *J* = 2.0 Hz, 1H), 6.80 – 6.67 (m, 2H), 5.92 (s, 2H), 2.11 (s, 3H).

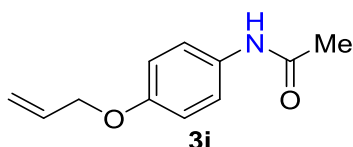

***N*-(4-(allyloxy)phenyl)acetamide (3i):** Prepared according to general procedure and crude was purified by silica gel column chromatography (hexane/ethyl acetate = 3:1, v/v) afforded the titled amide as white solid (92 mg, 96% yield; mp = 92–95 °C) whose spectral data was consistent with the literature values.<sup>10</sup>

<sup>1</sup>H NMR (400 MHz, CDCl<sub>3</sub>) δ 7.38 (d, *J* = 8.8 Hz, 2H), 7.14 (br s, 1H), 6.87 (d, *J* = 8.8 Hz, 2H), 6.11 – 5.97 (m, 1H), 5.40 (d, *J* = 16.9 Hz, 1H), 5.28 (d, *J* = 10.6 Hz, 1H), 4.51 (d, *J* = 5.2 Hz, 2H), 2.15 (s, 3H).

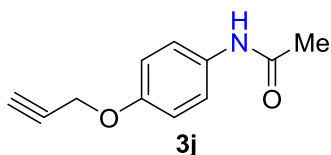

***N*-(4-(prop-2-yn-1-yloxy)phenyl)acetamide (3j):** Prepared according to general procedure and crude was purified by silica gel column chromatography (hexane/ethyl acetate = 3:1, v/v) afforded the titled amide as white solid (90 mg, 95% yield; mp = 92–95 °C) whose spectral data was consistent with the literature values.<sup>11</sup>

<sup>1</sup>H NMR (400 MHz, CDCl<sub>3</sub>) δ 7.59 (br s, 1H), 7.40 (d, *J* = 8.5 Hz, 2H), 6.91 (d, *J* = 8.4 Hz, 2H), 4.65 (s, 2H), 2.51 (s, 1H), 2.12 (s, 3H).

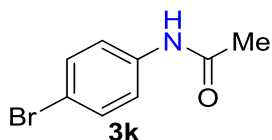

***N*-(4-Bromophenyl)acetamide (3k):** Prepared according to general procedure and titled amide was isolated as white solid (97.4 mg, 91% yield; mp = 166–170 °C) whose spectral data was consistent with the literature values.<sup>5</sup>

<sup>1</sup>H NMR (400 MHz, CDCl<sub>3</sub>) δ 7.46 – 7.36 (m, 4H), 7.18 (br s, 1H), 2.17 (s, 3H).

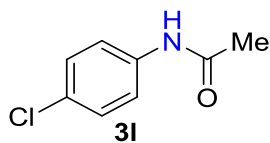

***N*-(4-Chlorophenyl)acetamide (3l):** Prepared according to general procedure and titled amide was isolated as white solid (76 mg, 90% yield; mp = 176–179 °C) whose spectral data was consistent with the literature values.<sup>12</sup>

<sup>1</sup>H NMR (400 MHz, CDCl<sub>3</sub>) δ 7.45 (d, *J* = 8.5 Hz, 2H), 7.27 (d, *J* = 8.7 Hz, 2H), 2.17 (s, 3H).

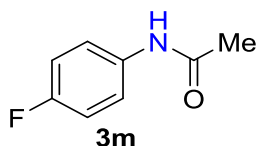

***N*-(4-Fluorophenyl)acetamide (3m):** Prepared according to general procedure and titled amide was isolated as white solid (66 mg, 86% yield; mp 155–158°C) whose spectral data was consistent with the literature values.<sup>5</sup>

<sup>1</sup>H NMR (400 MHz, CDCl<sub>3</sub>) δ 7.45 (dd, *J* = 8.7, 4.8 Hz, 2H), 7.38 (brs, 1H), 7.00 (t, *J* = 8.6 Hz, 2H), 2.16 (s, 3H)

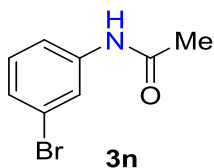

***N*-(3-Bromophenyl)acetamide (3n):** Prepared according to general procedure and titled amide was isolated as white solid (97 mg, 90% yield; mp 83–85 °C) whose spectral data was consistent with the literature values.<sup>9</sup>

<sup>1</sup>H NMR (400 MHz, CDCl<sub>3</sub>) δ 7.76 (s, 1H), 7.40 (d, *J* = 7.8 Hz, 1H), 7.25 – 7.13 (m, 2H), 2.18 (s, 3H).

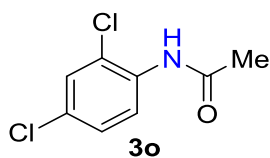

***N*-(2,4-Dichlorophenyl)acetamide (3o):** Prepared according to general procedure and crude was purified by silica gel column chromatography (hexane/ethyl acetate = 4:1, v/v) afforded the titled amide as brown solid (92 mg, 90% yield; mp = 142–144 °C) whose spectral data was consistent with the literature values.<sup>13</sup>

<sup>1</sup>H NMR (400 MHz, CDCl<sub>3</sub>) δ 8.33 (d, *J* = 8.8 Hz, 1H), 7.56 (br s, 1H), 7.37 (d, *J* = 2.4 Hz, 1H), 7.25 – 7.20 (m, 1H), 2.24 (s, 3H).

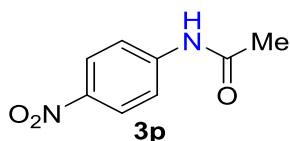

***N*-(4-Nitrophenyl)acetamide (3p):** Prepared according to general procedure and crude was purified by silica gel column chromatography (hexane/ethyl acetate = 4:1, v/v) afforded the titled amide as yellow solid (81 mg, 90% yield; mp 210–212 °C) whose spectral data was consistent with the literature values.<sup>14</sup>

<sup>1</sup>H NMR (400 MHz, CDCl<sub>3</sub>) δ 8.21 (d, *J* = 9.0 Hz, 2H), 7.69 (d, *J* = 9.0 Hz, 2H), 7.46 (br s, 1H), 2.25 (s, 3H).

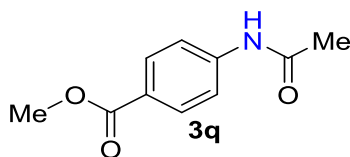

**Methyl 4-acetamidobenzoate (3q):** Prepared according to general procedure and crude was purified by silica gel column chromatography (hexane/ethyl acetate = 4:1, v/v) afforded the titled amide as white solid (81 mg, 84% yield; mp 112–115 °C) whose spectral data was consistent with the literature values.<sup>5</sup>

<sup>1</sup>H NMR (400 MHz, CDCl<sub>3</sub>) δ 8.00 (d, *J* = 8.5 Hz, 2H), 7.59 (d, *J* = 8.3 Hz, 2H), 7.48 (br s, 1H), 3.90 (s, 3H), 2.21 (s, 3H).

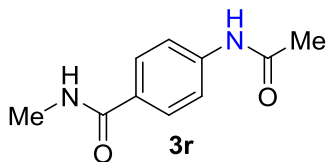

**4-acetamido-*N*-methylbenzamide (3r):** Prepared according to general procedure and titled amide was isolated as white solid (94 mg, 98% yield; mp 183–185 °C) whose spectral data was consistent with the literature values.<sup>15</sup>

$^1\text{H}$  NMR (400 MHz,  $\text{DMSO-}d_6$ )  $\delta$  10.04 (br s, 2H), 7.48 (s, 4H), 2.00 (s, 6H).

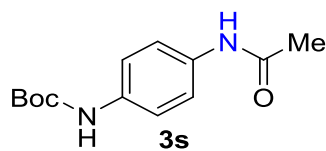

**tert-Butyl (4-acetamidophenyl)carbamate (3s):** Prepared according to general procedure and crude was purified by silica gel column chromatography (hexane/ethyl acetate = 3:1, v/v) afforded the titled amide as white solid (106.4 mg, 85% yield; mp 162–165 °C) whose spectral data was consistent with the literature values.<sup>5</sup>

$^1\text{H}$  NMR (400 MHz,  $\text{CDCl}_3$ )  $\delta$  7.41 (d,  $J = 8.7$  Hz, 2H), 7.30 (d,  $J = 8.4$  Hz, 2H), 7.15 (br s, 1H), 6.45 (br s, 1H), 2.15 (s, 3H), 1.51 (s, 9H).

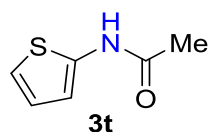

**N-(Thiophen-2-yl)acetamide (3t):** Prepared according to general procedure and crude was purified by silica gel column chromatography (hexane/ethyl acetate = 5:1, v/v) afforded the titled amide as brown solid (35 mg, 50% yield; mp 158–160 °C) whose spectral data was consistent with the literature values.<sup>5</sup>

$^1\text{H}$  NMR (400 MHz,  $\text{CDCl}_3$ )  $\delta$  8.20 (br s, 1H), 6.91 – 6.80 (m, 2H), 6.68 – 6.62 (m, 1H), 2.20 (s, 3H).

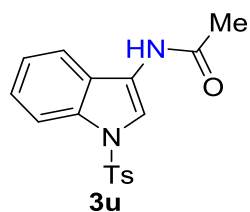

**N-(1-Tosyl-1H-indol-3-yl)acetamide (3u):** Prepared according to general procedure and crude was purified by silica gel column chromatography (hexane/ethyl acetate = 4:1, v/v) afforded the titled amide as white solid (125 mg, 76% yield; mp 192–194 °C) whose spectral data was consistent with the literature values.<sup>5</sup>

$^1\text{H}$  NMR (400 MHz,  $\text{CDCl}_3$ )  $\delta$  8.20 (s, 1H), 8.07 (d,  $J = 8.4$  Hz, 1H), 7.76 (d,  $J = 8.1$  Hz, 2H), 7.41 – 7.32 (m, 2H), 7.29 (br s, 1H), 7.25 – 7.21 (m, 1H), 7.18 (d,  $J = 8.1$  Hz, 2H), 2.31 (s, 3H), 2.24 (s, 3H).



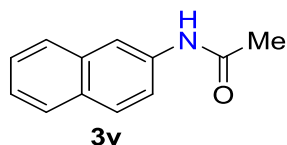

***N*-(Naphthalen-2-yl)acetamide (3v):** Prepared according to general procedure and crude was purified by silica gel column chromatography (hexane/ethyl acetate = 3:1, v/v) afforded the titled amide as brown solid (85.2 mg, 92% yield; mp = 134–136 °C) whose spectral data was consistent with the literature values.<sup>16</sup>

<sup>1</sup>H NMR (400 MHz, CDCl<sub>3</sub>) δ 8.18 (s, 1H), 7.78 (d, *J* = 7.8 Hz, 3H), 7.53 – 7.33 (m, 4H), 2.24 (s, 3H).

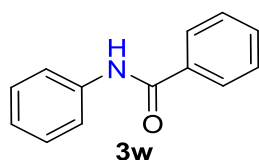

***N*-Phenylbenzamide (3w):** Prepared according to general procedure and crude was purified by silica gel column chromatography (hexane/ethyl acetate = 4:1, v/v) afforded the titled amide as white solid (69 mg, 70% yield; mp 168-170°C) whose spectral data was consistent with the literature values.<sup>5</sup>

<sup>1</sup>H NMR (400 MHz, CDCl<sub>3</sub>) δ 7.95 (br s, 1H), 7.86 (d, *J* = 7.4 Hz, 2H), 7.65 (d, *J* = 7.8 Hz, 2H), 7.58 – 7.51 (m, 1H), 7.47 (t, *J* = 7.4 Hz, 2H), 7.36 (t, *J* = 7.7 Hz, 2H), 7.15 (t, *J* = 7.3 Hz, 1H).

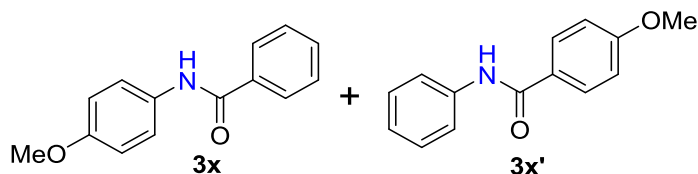

***N*-(4-Methoxyphenyl)benzamide (3x) and 4-methoxy-*N*-phenylbenzamide (3x'):**<sup>16</sup> Prepared according to general procedure and crude was purified by silica gel column chromatography (hexane/ethyl acetate = 4:1, v/v) afforded the titled amide as white solid (102 mg, 90% yield; 64:36 isomeric mixture; mp 110-115 °C) whose spectral data was consistent with the literature values.<sup>17</sup>

<sup>1</sup>H NMR (400 MHz, DMSO-*d*<sub>6</sub>) δ 10.07 (s, 1H), 10.03 (s, 0.6H), 7.89 (t, *J* = 7.9 Hz, 3.2H), 7.71 (d, *J* = 8.1 Hz, 1.2H), 7.62 (d, *J* = 8.7 Hz, 2H), 7.54 – 7.38 (m, 3H), 7.27 (t, *J* = 7.7 Hz, 1.2H), 7.07 – 6.93 (m, 1.8H), 6.86 (d, *J* = 8.8 Hz, 2H), 3.76 (s, 1.8H), 3.67 (s, 3H).

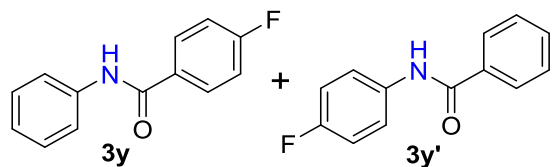

**4-fluoro-*N*-phenylbenzamide (3y) and *N*-(4-fluorophenyl)benzamide (3y')**: Prepared according to general procedure and crude was purified by silica gel column chromatography (hexane/ethyl acetate = 5:1, v/v) afforded the titled amide as white solid (97 mg, 90% yield; 1:1 isomeric mixture; mp = 175-180 °C) whose spectral data was consistent with the literature values.<sup>18</sup>

<sup>1</sup>H NMR (400 MHz, DMSO-*d*<sub>6</sub>) δ 10.31 (s, 1H), 10.27 (s, 1H), 8.08 – 8.02 (m, 2H), 7.99 – 7.94 (m, 2H), 7.84 – 7.75 (m, 4H), 7.62 – 7.50 (m, 3H), 7.39 – 7.32 (m, 4H), 7.23 – 7.16 (m, 2H), 7.11 (t, *J* = 7.4 Hz, 1H).

<sup>13</sup>C NMR (100 MHz, DMSO-*d*<sub>6</sub>) δ 165.52, 165.33, 164.48, 162.86, 159.54, 157.15, 139.09, 135.56, 135.53, 134.85, 131.59, 131.44, 131.41, 130.44, 130.35, 128.62, 128.40, 127.64, 123.75, 122.28, 122.20, 120.47, 115.42, 115.28, 115.20, 115.06.

<sup>19</sup>F NMR (376 MHz, DMSO-*d*<sub>6</sub>) δ -108.77 (s, 1F), -118.83 (s, 1F).

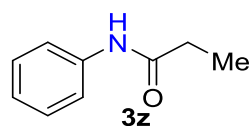

***N*-Phenylpropionamide (3z)**: Prepared according to general procedure and crude was purified by silica gel column chromatography (hexane/ethyl acetate = 5:1, v/v) afforded the titled amide as white solid (67 mg, 90% yield; mp 108-110°C) whose spectral data was consistent with the literature values.<sup>19</sup>

<sup>1</sup>H NMR (400 MHz, CDCl<sub>3</sub>) δ 8.16 (br s, 1H), 7.53 (d, *J* = 7.9 Hz, 2H), 7.26 (t, *J* = 7.7 Hz, 2H), 7.06 (t, *J* = 7.2 Hz, 1H), 2.35 (q, *J* = 7.5 Hz, 2H), 1.19 (t, *J* = 7.5 Hz, 3H).

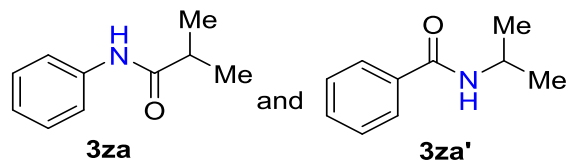

***N*-Phenylisobutyramide (3za) and *N*-isopropylbenzamide (3za')**: Prepared according to general procedure and crude was purified by silica gel column chromatography (hexane/ethyl

acetate = 5:1, v/v) afforded **3za** as white solid (53 mg, 65% yield; mp 110–111°C) along with **3za'** (19 mg, 24% yield) whose spectral data was consistent with the literature values.<sup>5,20</sup>

***N*-Phenylisobutyramide (3za):**<sup>5</sup>

<sup>1</sup>H NMR (400 MHz, CDCl<sub>3</sub>) δ 7.53 (d, *J* = 8.0 Hz, 2H), 7.32 (t, *J* = 7.7 Hz, 2H), 7.10 (t, *J* = 7.4 Hz, 1H), 2.59 – 2.43 (m, 1H), 1.26 (d, *J* = 6.8 Hz, 6H).

***N*-Isopropylbenzamide (3za'):**<sup>20</sup>

<sup>1</sup>H NMR (400 MHz, CDCl<sub>3</sub>) δ 7.80 – 7.69 (m, 2H), 7.51 – 7.33 (m, 3H), 6.09 (s, 1H), 4.36 – 4.19 (m, 1H), 1.24 (d, *J* = 6.5 Hz, 6H).

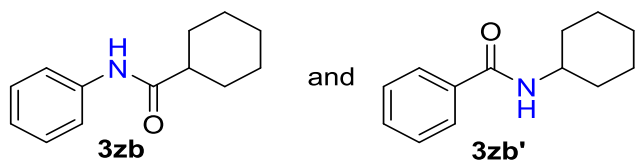

***N*-Phenylcyclohexanecarboxamide (3zb) and *N*-cyclohexylbenzamide (3zb'):** Prepared according to general procedure and crude was purified by silica gel column chromatography (hexane/ethyl acetate = 5:1, v/v) afforded the titled amide **3z** as white solid (71 mg, 70% yield; mp 141–144 °C) along with **3zb'** white solid (18 mg, 18% yield, mp 141–144 °C) whose spectral data was consistent with the literature values.<sup>5</sup>

***N*-Phenylcyclohexanecarboxamide (3zb):**

<sup>1</sup>H NMR (400 MHz, CDCl<sub>3</sub>) δ 7.53 (d, *J* = 7.9 Hz, 2H), 7.35 – 7.24 (m, 3H), 7.08 (t, *J* = 7.3 Hz, 1H), 2.27 – 2.18 (m, 1H), 1.95 (d, *J* = 12.6 Hz, 2H), 1.83 (d, *J* = 11.1 Hz, 2H), 1.73 – 1.66 (m, 1H), 1.60 – 1.49 (m, 2H), 1.38 – 1.25 (m, 3H).

***N*-cyclohexylbenzamide (3zb'):**

<sup>1</sup>H NMR (400 MHz, CDCl<sub>3</sub>) δ 7.75 (d, *J* = 7.4 Hz, 2H), 7.48 (t, *J* = 7.2 Hz, 1H), 7.42 (t, *J* = 7.4 Hz, 2H), 5.96 (br s, 1H), 4.07 – 3.89 (m, 1H), 2.09 – 1.96 (m, 2H), 1.80 – 1.71 (m, 2H), 1.70 – 1.65 (m, 1H), 1.48 – 1.37 (m, 2H), 1.30 – 1.17 (m, 3H).

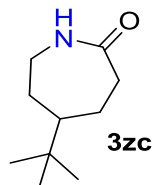

**5-(*tert*-Butyl)azepan-2-one (3zc):** Prepared according to general procedure and crude was purified by silica gel column chromatography (hexane/ethyl acetate = 3:1, v/v) afforded the

titled amide as white solid (64 mg, 75% yield; mp 150-154 °C) whose spectral data was consistent with the literature values.<sup>21</sup>

<sup>1</sup>H NMR (400 MHz, CDCl<sub>3</sub>) δ 6.50 (br s, 1H), 3.28 – 3.14 (m, 2H), 2.57 – 2.28 (m, 2H), 2.02 – 1.89 (m, 2H), 1.32 – 1.14 (m, 3H), 0.86 (s, 9H).

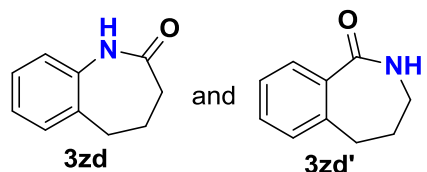

**1,3,4,5-tetrahydro-2H-benzo[b]azepin-2-one (3zd) and 2,3,4,5-tetrahydro-1H-benzo[c]azepin-1-one (3zd')**: Prepared according to general procedure and crude was purified by silica gel column chromatography (hexane/ethyl acetate = 5:1, v/v) afforded the titled amide as white solid (53 mg, 66% yield; mp 136-138 °C) along with **3zd'** as white solid (20 mg, 25% yield; mp 100-103 °C) whose spectral data was consistent with the literature values.<sup>17, 22</sup>

**1,3,4,5-tetrahydro-2H-benzo[b]azepin-2-one (3zd):**<sup>17</sup>

<sup>1</sup>H NMR (400 MHz, CDCl<sub>3</sub>) δ 9.14 (br s, 1H), 7.25 – 7.14 (m, 2H), 7.14 – 7.06 (m, 1H), 7.03 (d, *J* = 7.7 Hz, 1H), 2.80 (t, *J* = 7.2 Hz, 2H), 2.35 (t, *J* = 7.2 Hz, 2H), 2.29 – 2.15 (m, 2H).

**2,3,4,5-tetrahydro-1H-benzo[c]azepin-1-one (3zd')**:<sup>22</sup>

<sup>1</sup>H NMR (400 MHz, CDCl<sub>3</sub>) δ 7.75 (br s, 1H), 7.68 (dd, *J* = 7.5, 1.6 Hz, 1H), 7.37 (td, *J* = 7.4, 1.6 Hz, 1H), 7.31 (td, *J* = 7.5, 1.4 Hz, 1H), 7.16 (d, *J* = 7.8 Hz, 1H), 3.10 (q, *J* = 6.4 Hz, 2H), 2.83 (t, *J* = 7.1 Hz, 2H), 2.05 – 1.93 (m, 2H).

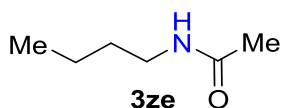

**N-Butylacetamide (3ze)**: Prepared according to general procedure and crude was purified by silica gel column chromatography (hexane/ethyl acetate = 4:1, v/v) afforded the titled amide as clear oil (52 mg, 90% yield) whose spectral data was consistent with the literature values.<sup>8</sup>

<sup>1</sup>H NMR (400 MHz, CDCl<sub>3</sub>) δ 6.84 (br s, 3H), 3.22 (dd, *J* = 13.1, 7.0 Hz, 2H), 1.98 (s, 3H), 1.49 (dt, *J* = 14.9, 7.3 Hz, 2H), 1.43 – 1.28 (m, 2H), 0.92 (t, *J* = 7.3 Hz, 3H).

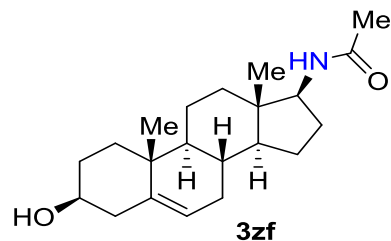

*N*-((3*S*,8*R*,9*S*,10*R*,13*S*,14*S*,17*S*)-3-Hydroxy-10,13-dimethyl-2,3,4,7,8,9,10,11,12,13,14,15,16,17-tetradecahydro-1*H*-cyclopenta[*a*] phenanthren-17-yl)acetamide (**3zf**):<sup>5</sup> Prepared according to general procedure and crude was purified by silica gel column chromatography (hexane/ethyl acetate = 3:1, v/v) afforded the titled amide as white solid (149 mg, 90% yield; mp 234–236 °C) whose spectral data was consistent with the literature values.<sup>5</sup>

<sup>1</sup>H NMR (400 MHz, CDCl<sub>3</sub>) δ 5.37 – 5.32 (m, 1H), 5.31 – 5.23 (m, 1H), 3.89 (q, *J* = 9.0 Hz, 1H), 3.52 (td, *J* = 11.1, 5.5 Hz, 1H), 2.35 – 2.06 (m, 3H), 2.05 – 1.93 (m, 4H), 1.84 (d, *J* = 10.2 Hz, 2H), 1.69 (dd, *J* = 15.7, 11.8 Hz, 2H), 1.64 – 1.53 (m, 3H), 1.53 – 1.35 (m, 3H), 1.34 – 1.18 (m, 3H), 1.16 – 1.03 (m, 2H), 1.01 (s, 3H), 0.96 (dd, *J* = 11.5, 4.6 Hz, 1H), 0.70 (s, 3H).

## 5. References:

1. T. Sheradsky, *J. Heterocycl. Chem.*, 1967, **4**, 413-414.
2. J. A. Smulik and E. Vedejs, *Org. Lett.*, 2003, **5**, 4187-4190.
3. C. Grohmann, H. Wang and F. Glorius, *Org. Lett.*, 2013, **15**, 3014-3017.
4. X. Ma, I. R. Hazelden, T. Langer, R. H. Munday and J. F. Bower, *J. Am. Chem. Soc.*, 2019, **141**, 3356-3360.
5. X. Mo, T. D. R. Morgan, H. T. Ang and D. G. Hall, *J. Am. Chem. Soc.*, 2018, **140**, 5264-5271.
6. L. Tang, Z.-L. Wang, H.-L. Wan, Y.-H. He and Z. Guan, *Org. Lett.*, 2020, **22**, 6182-6186.
7. F. Liu, N. Wu and X. Cheng, *Org. Lett.*, 2021, **23**, 3015-3020.
8. L. Schulz, M. Enders, B. Elsler, D. Schollmeyer, K. M. Dyballa, R. Franke and S. R. Waldvogel, *Angew. Chem. Int. Ed.*, 2017, **56**, 4877-4881.
9. H. J. Kiely-Collins, I. Sechi, P. E. Brennan and M. G. McLaughlin, *Chem. Commun.*, 2018, **54**, 654-657.
10. B. Schmidt and F. Wolf, *J. Org. Chem.*, 2017, **82**, 4386-4395.
11. Y. Wang, K. Ji, S. Lan and L. Zhang, *Angew. Chem.*, 2012, **124**, 1951-1954.
12. N. An, B.-X. Tian, H.-J. Pi, L. A. Eriksson and W.-P. Deng, *J. Org. Chem.*, 2013, **78**, 4297-4302.
13. H. Singh, C. Sen, T. Sahoo and S. C. Ghosh, *Eur. J. Org. Chem.*, 2018, **34**, 4748-4753.
14. J. K. Augustine, R. Kumar, A. Bombrun and A. B. Mandal, *Tetrahedron Lett.*, 2011, **52**, 1074-1077.
15. B. Zeynizadeh, R. Younesi and H. Mousavi, *Res. Chem. Intermed.* 2018, **44**, 7331-7352.
16. M. Hashimoto, Y. Obora, S. Sakaguchi and Y. Ishii, *J. Org. Chem.*, 2008, **73**, 2894-2897.
17. K. Hyodo, G. Hasegawa, N. Oishi, K. Kuroda and K. Uchida, *J. Org. Chem.*, 2018, **83**, 13080-13087.
18. S. A. Rzhavskiy, A. A. Ageshina, G. A. Chesnokov, P. S. Gribanov, M. A. Topchiy, M. S. Nechaev and A. F. Asachenko, *RSC Adv.*, 2019, **9**, 1536-1540.
19. L. R. Steffel, T. J. Cashman, M. H. Reutershan and B. R. Linton, *J. Am. Chem. Soc.*, 2007, **129**, 12956-1295.
20. Y. Furuya, K. Ishihara, and H. Yamamoto, *J. Am. Chem. Soc.*, 2005, **127**, 11240-11241.
21. C. E. Katz and J. Aube, *J. Am. Chem. Soc.*, 2003, **125**, 13948-13949.
22. M. S. Sherikar, R. Devarajappa and K. R. Prabhu, *J. Org. Chem.*, 2021, **86**, 4625-4637.

## 6. NMR spectra of products

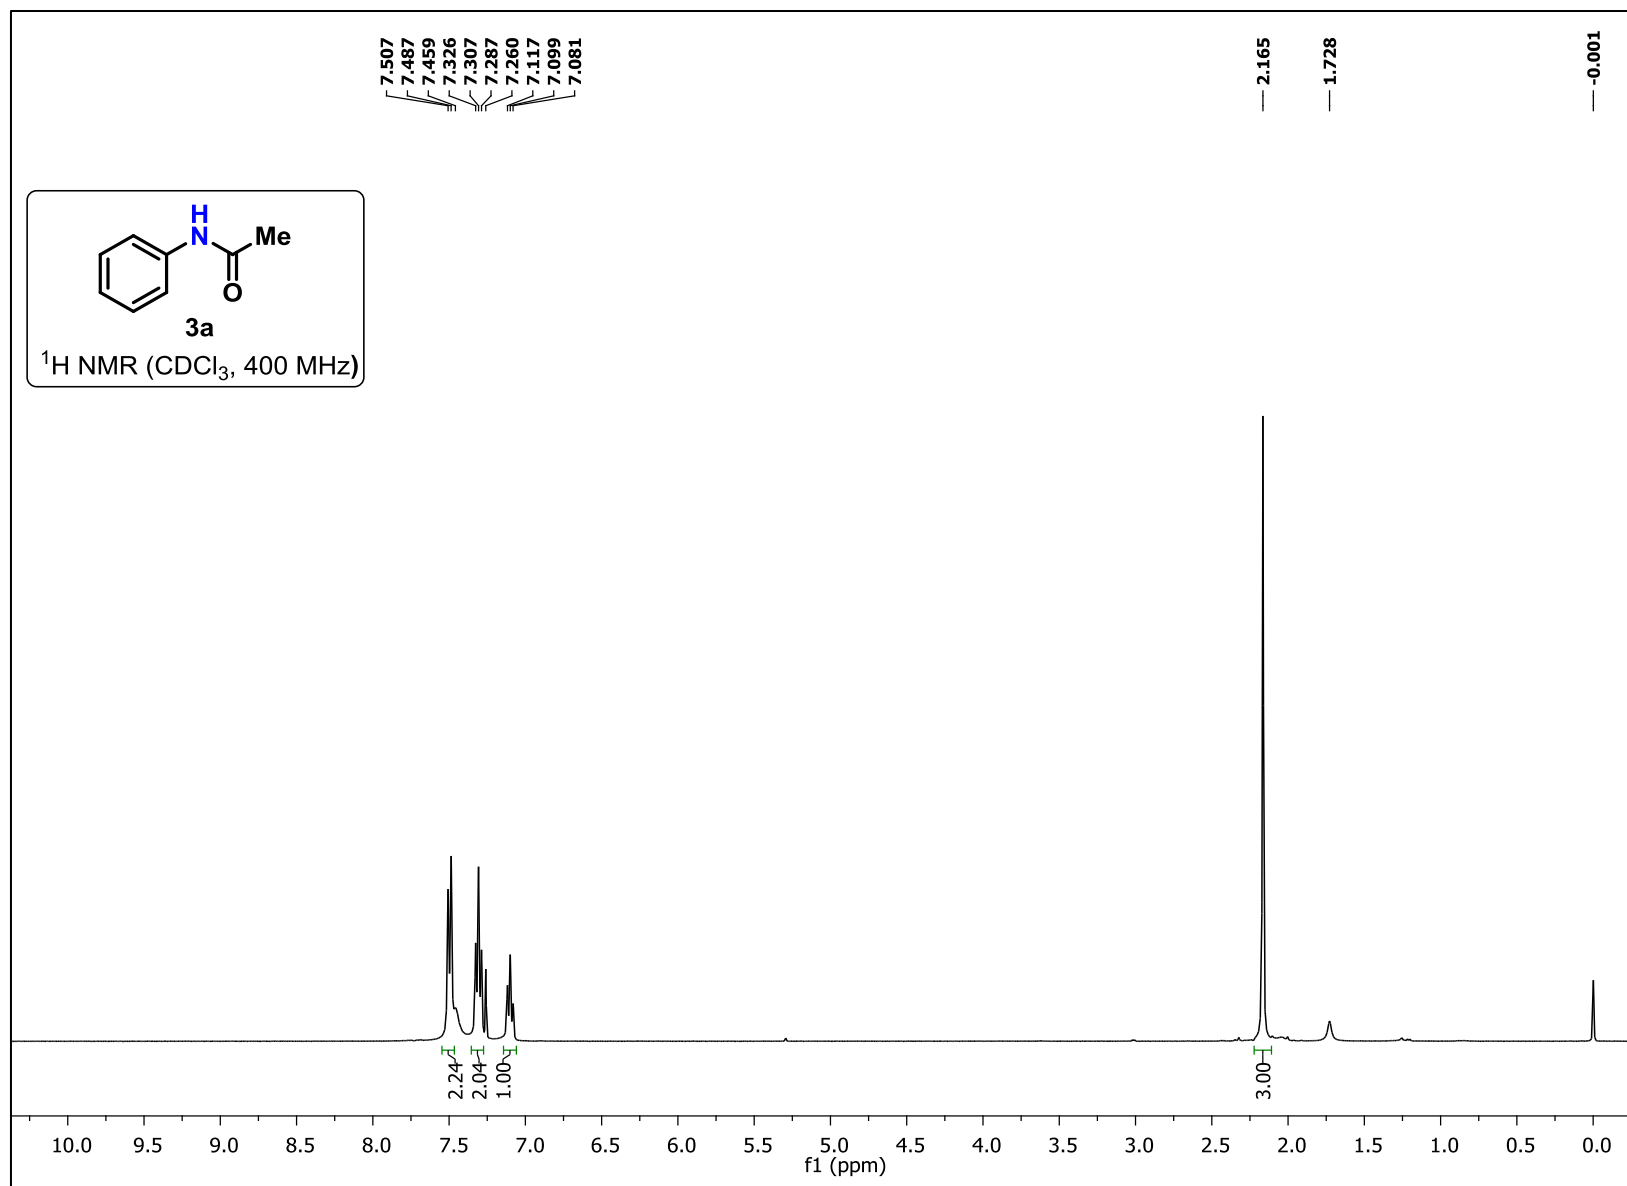

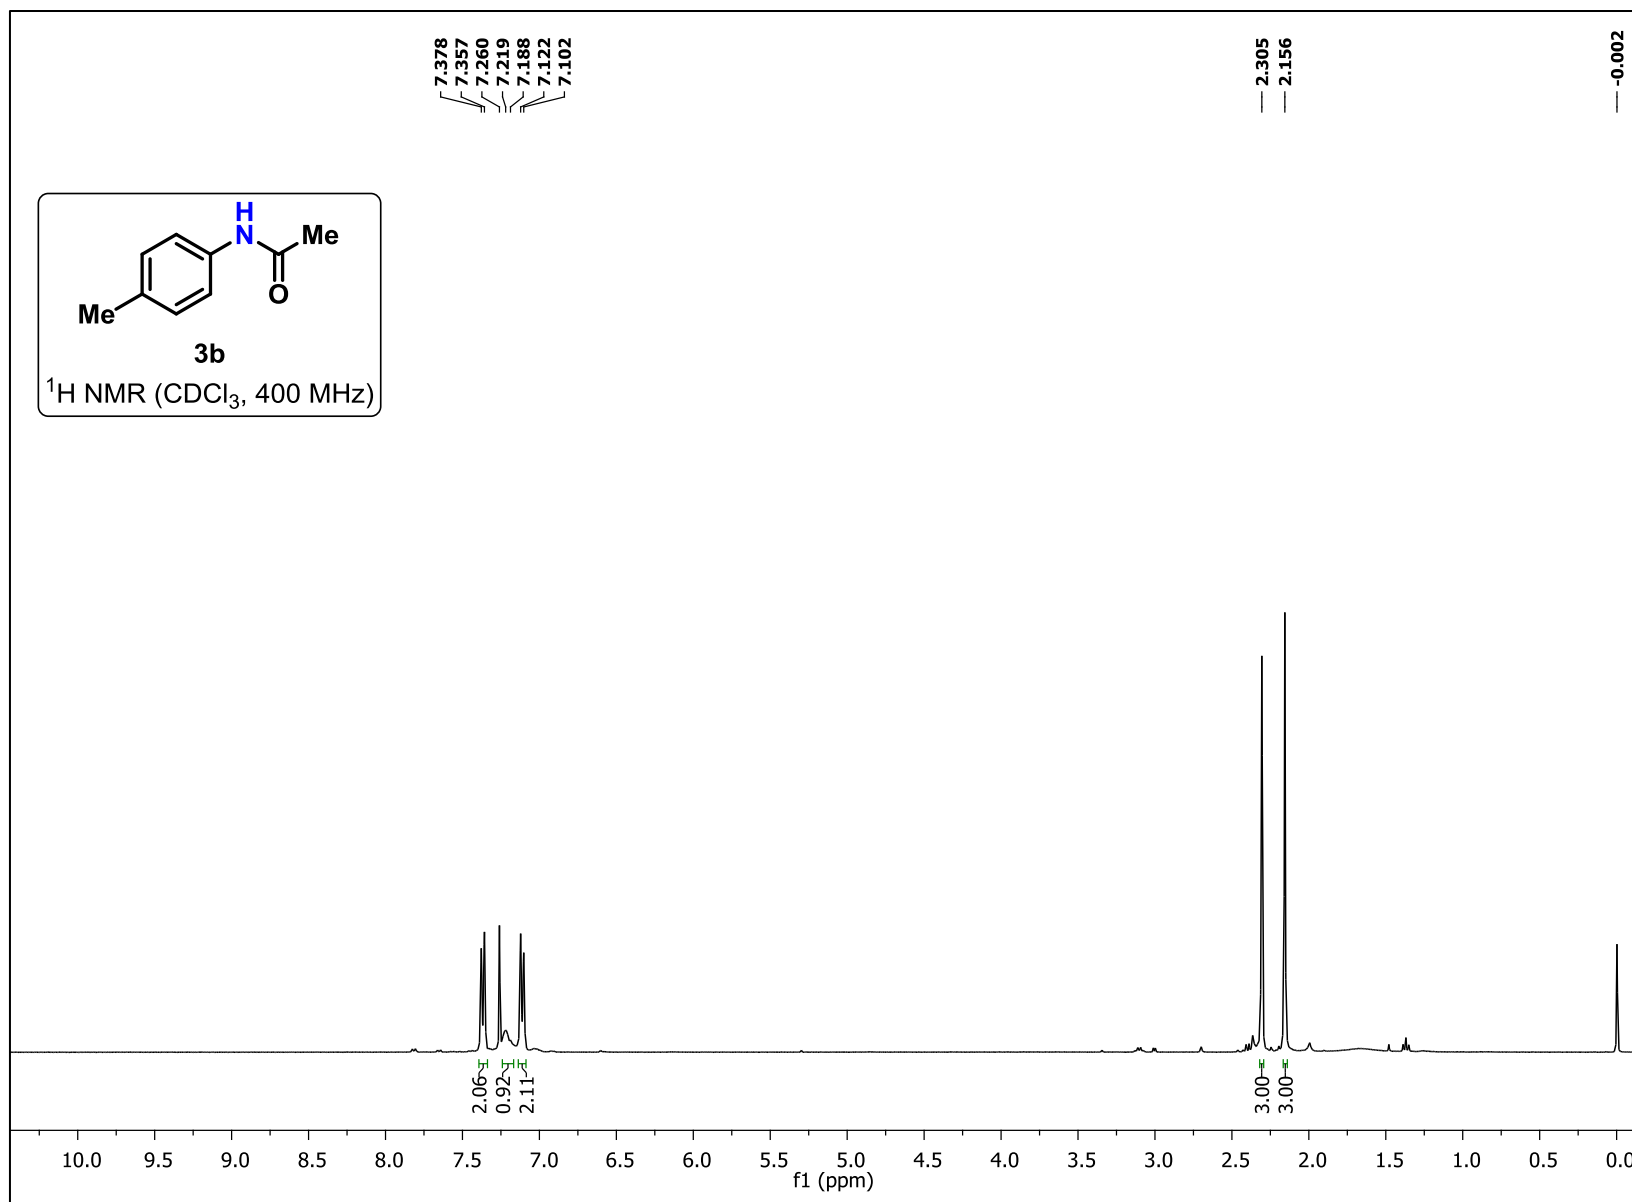



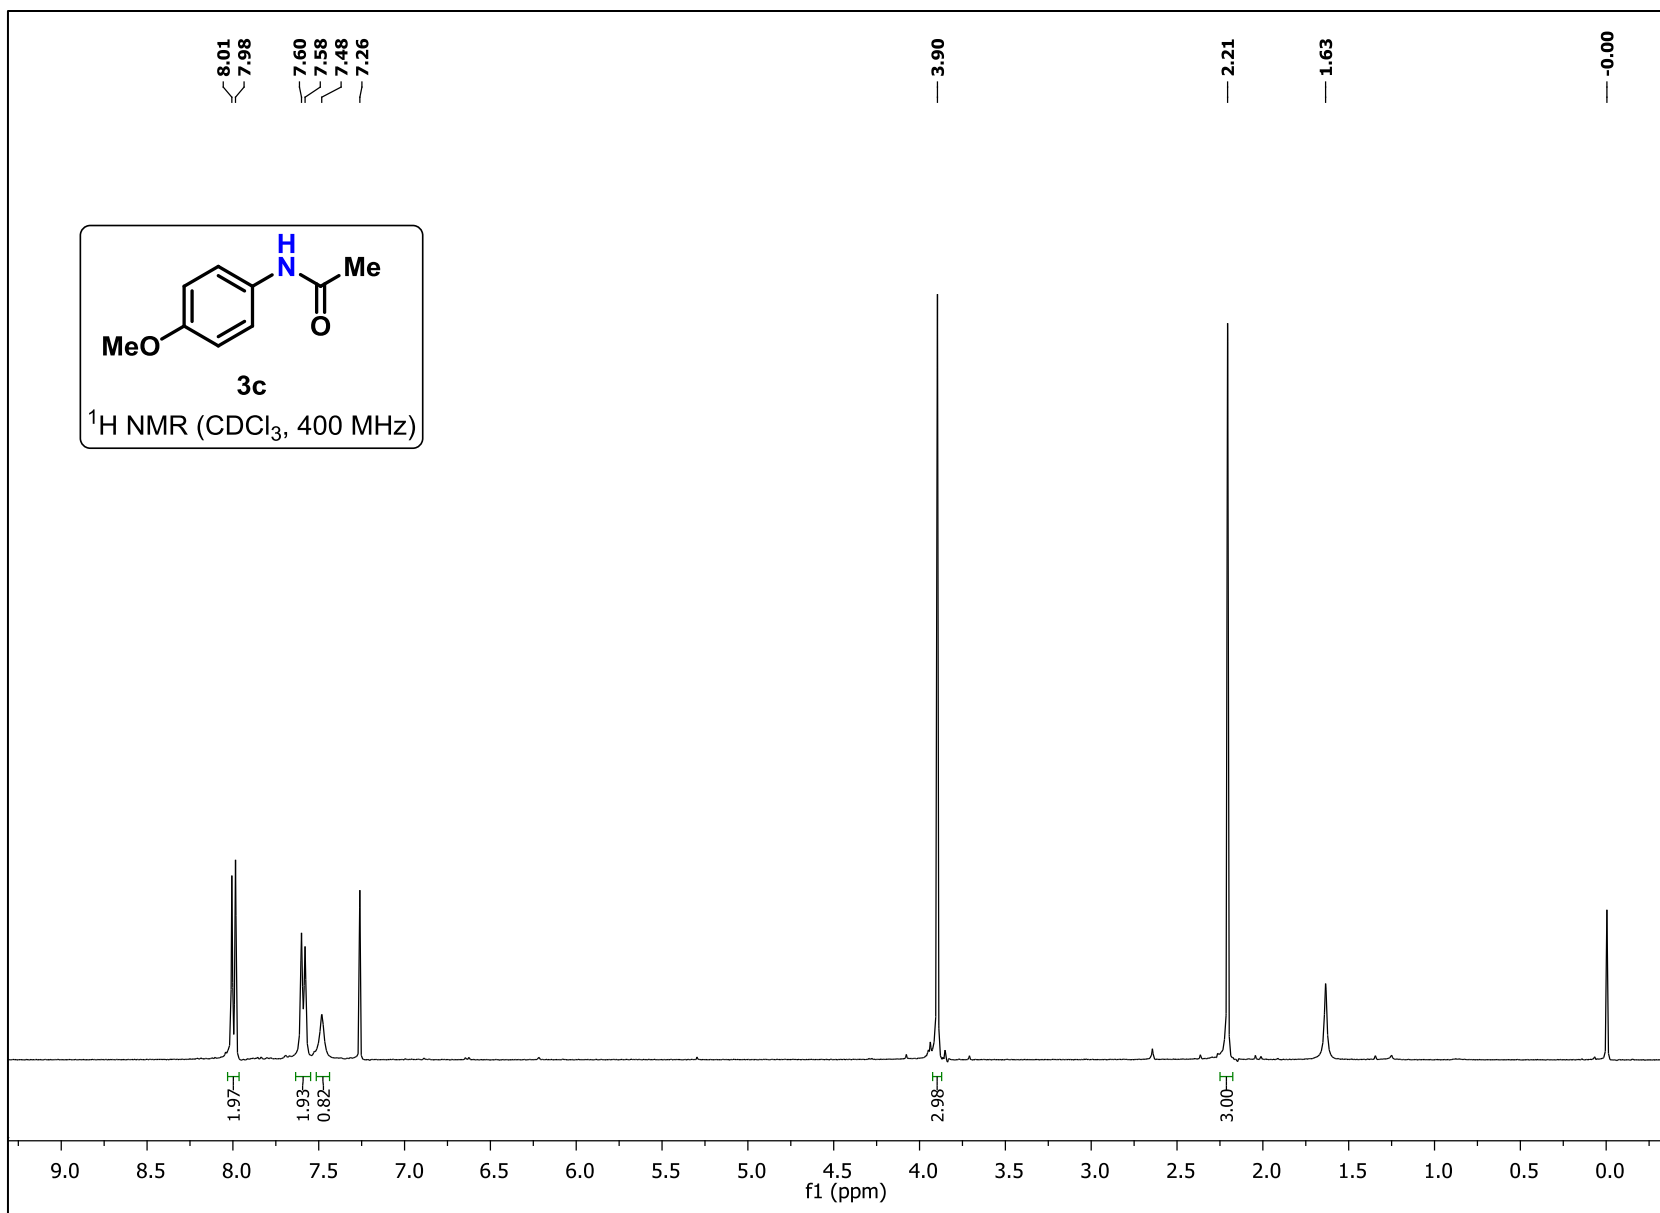

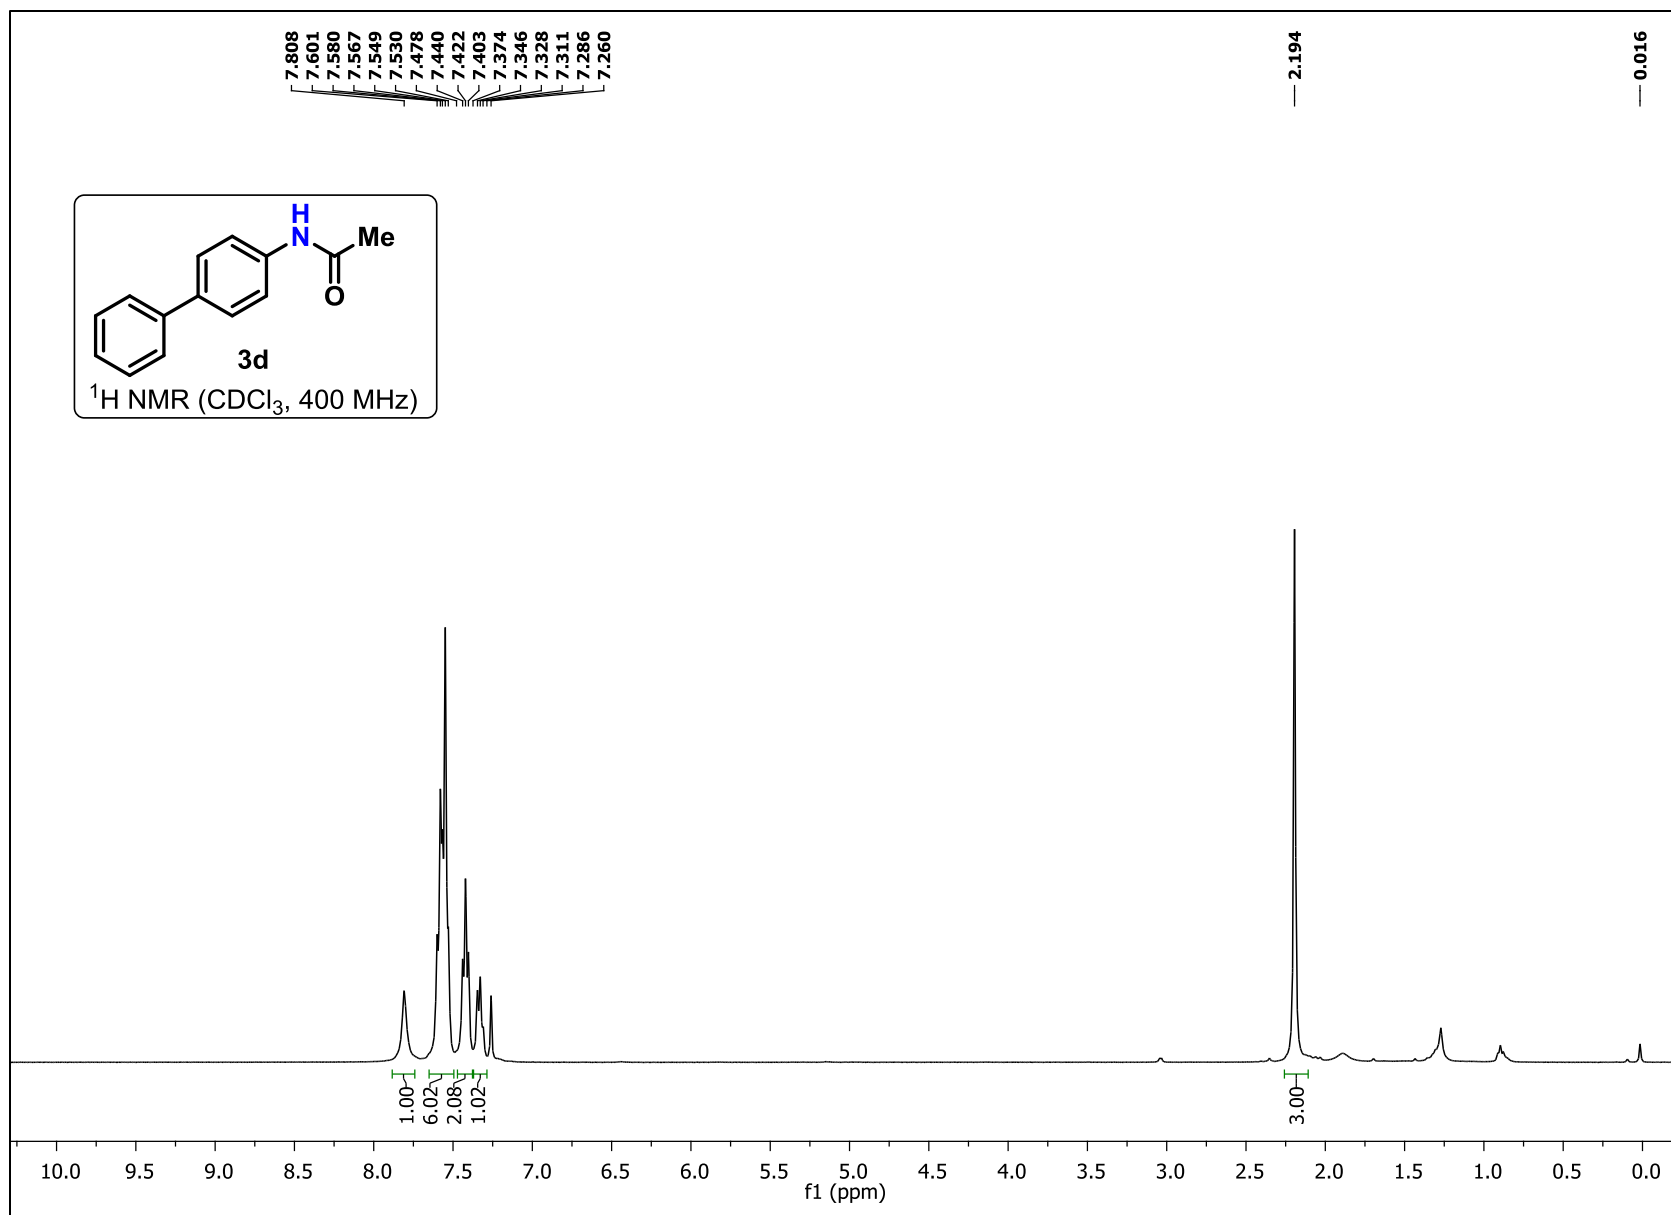

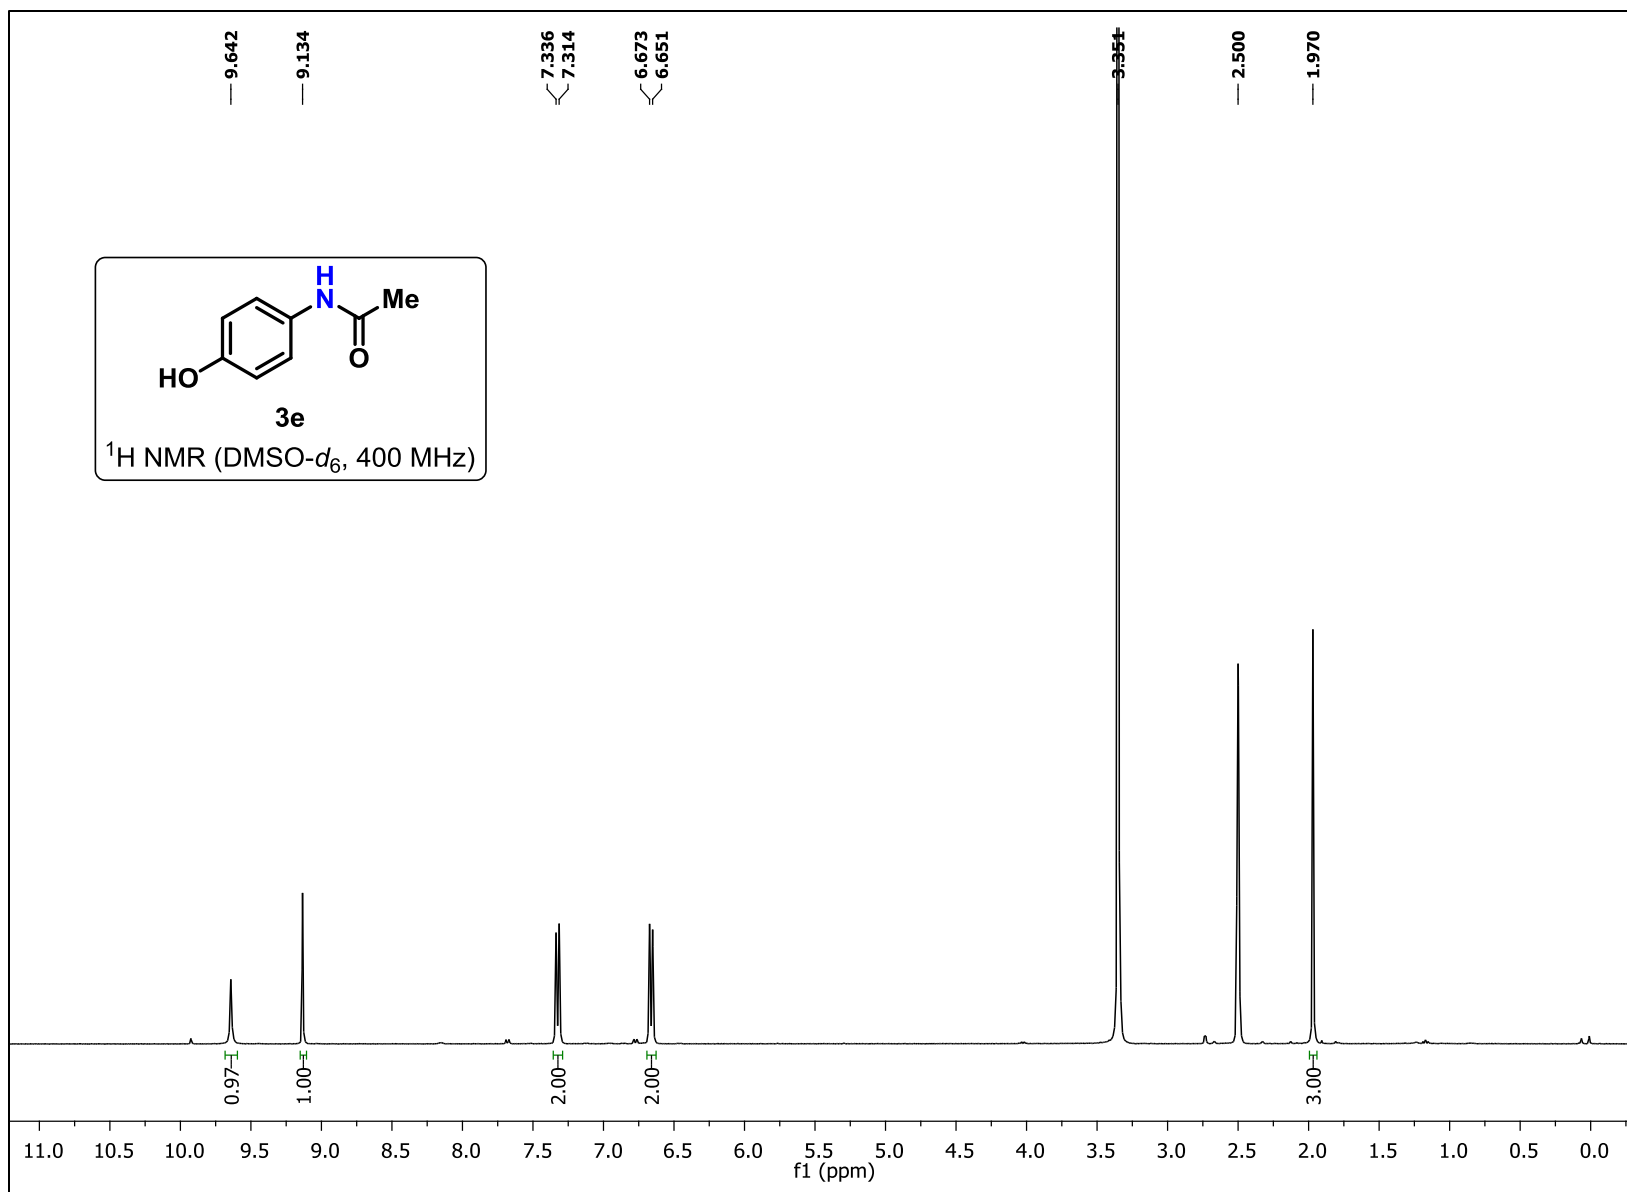

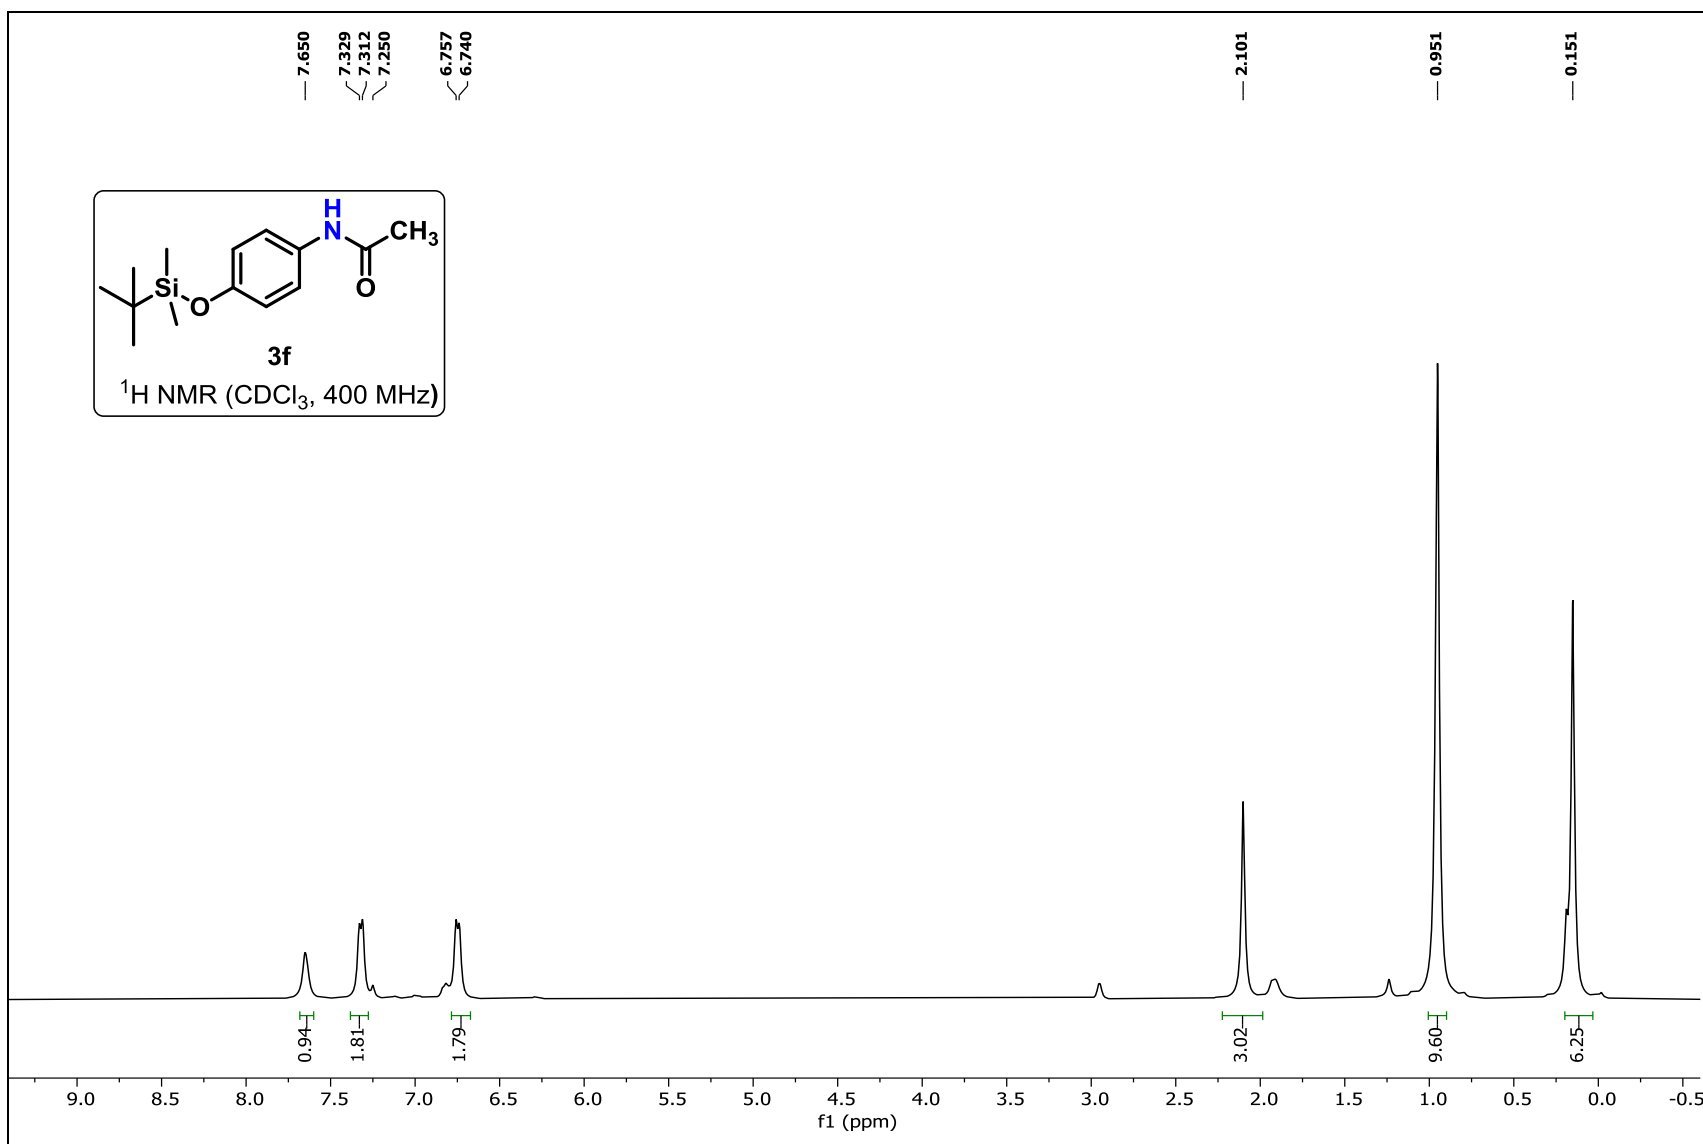

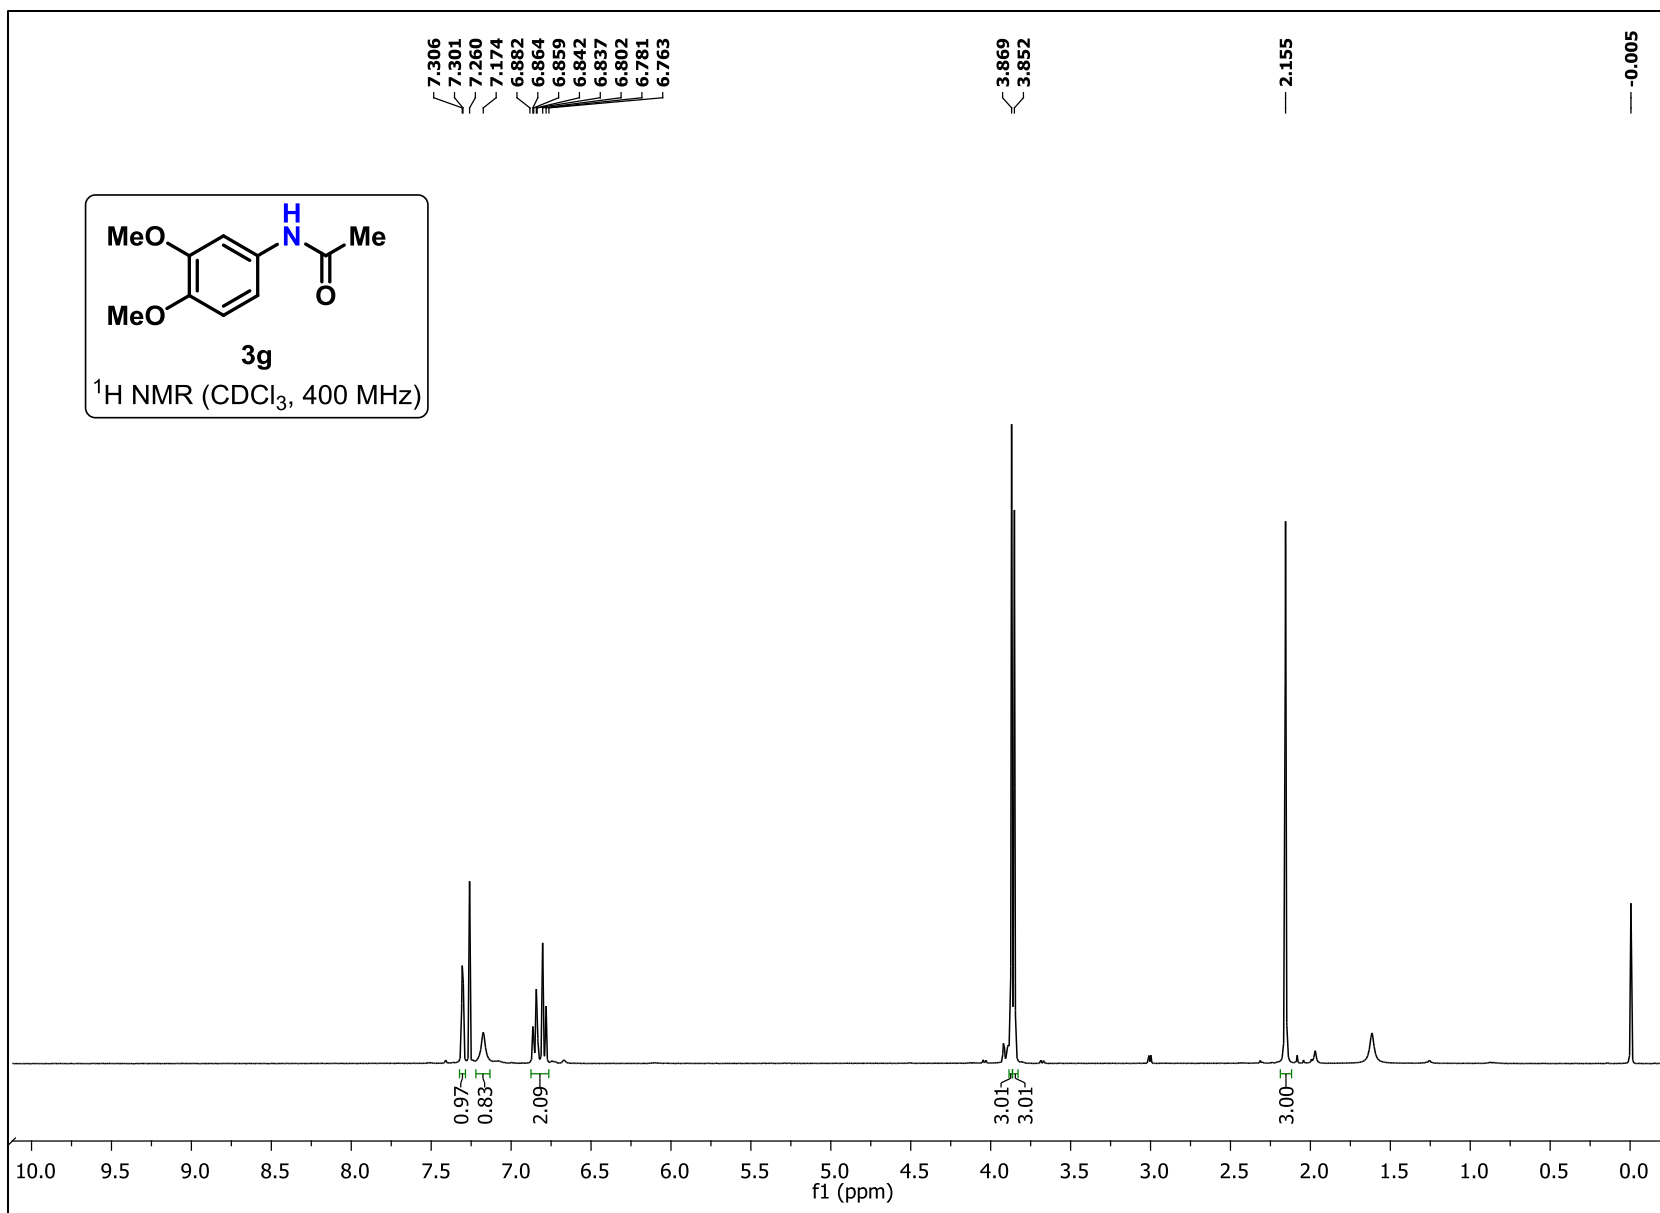

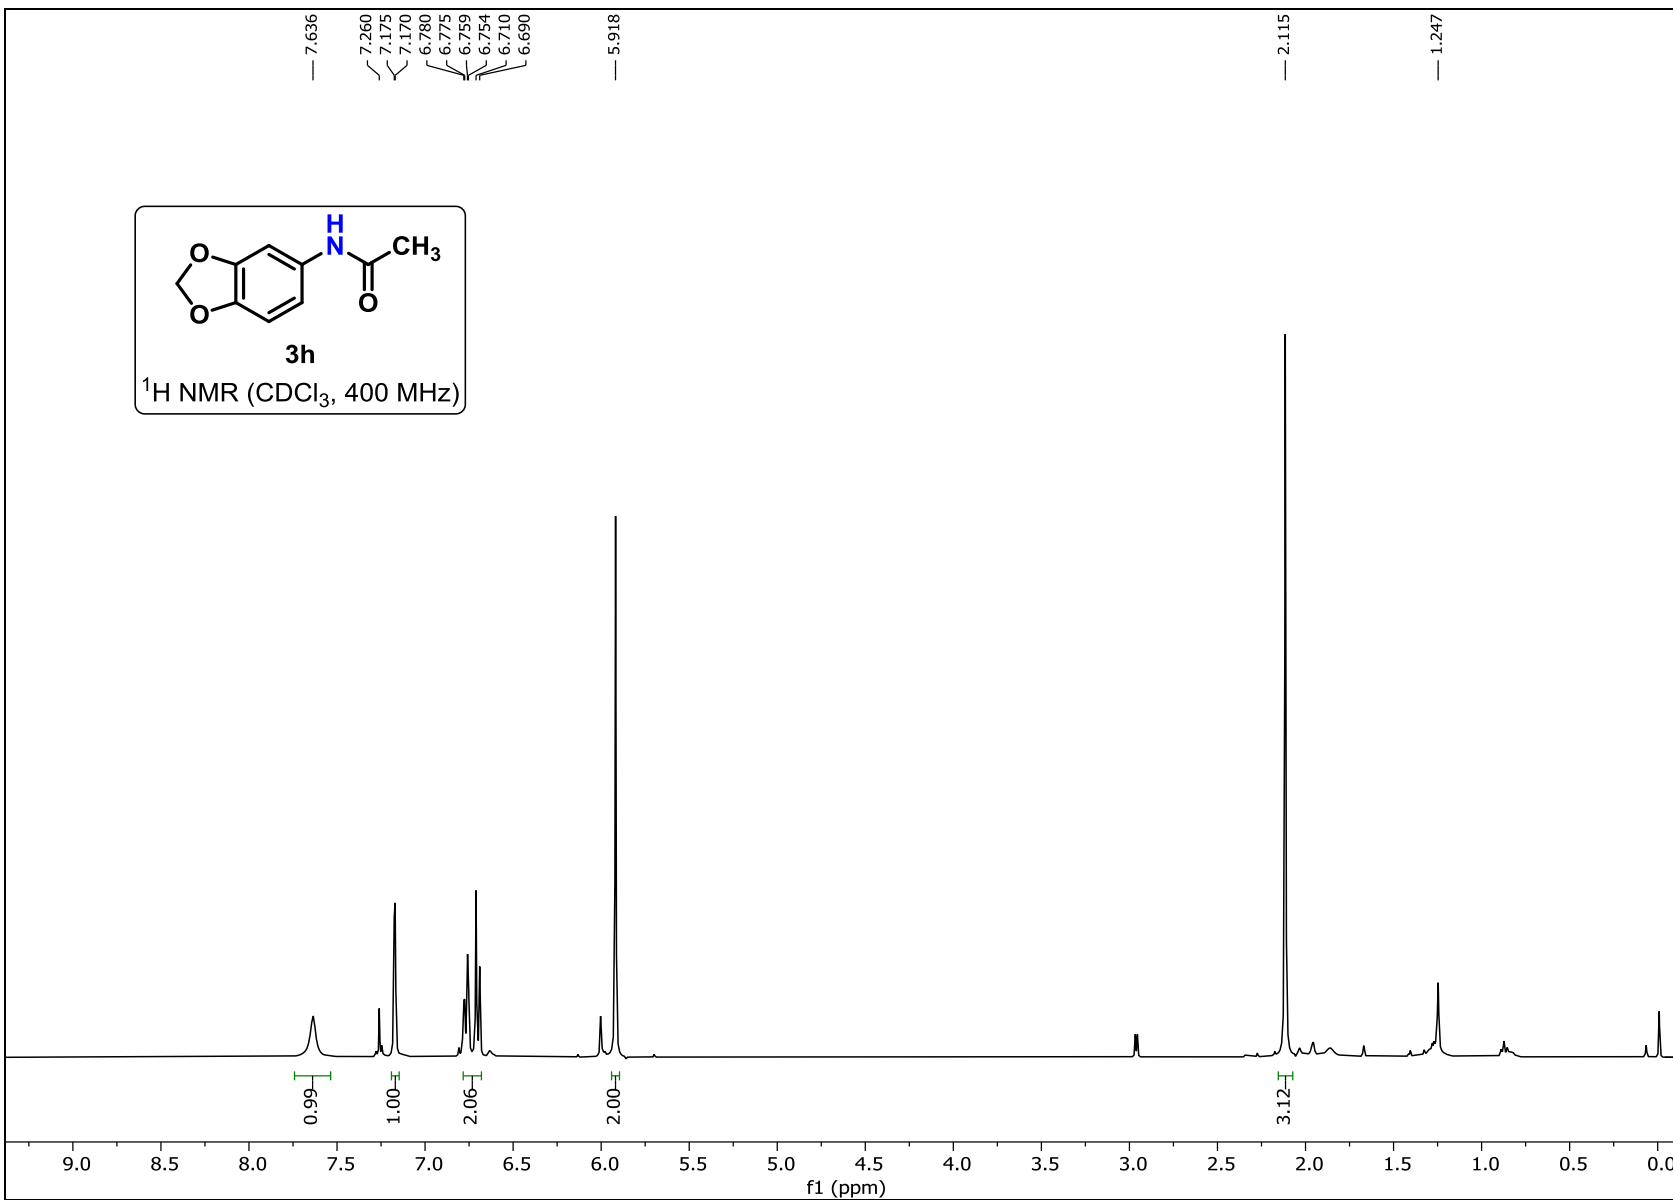

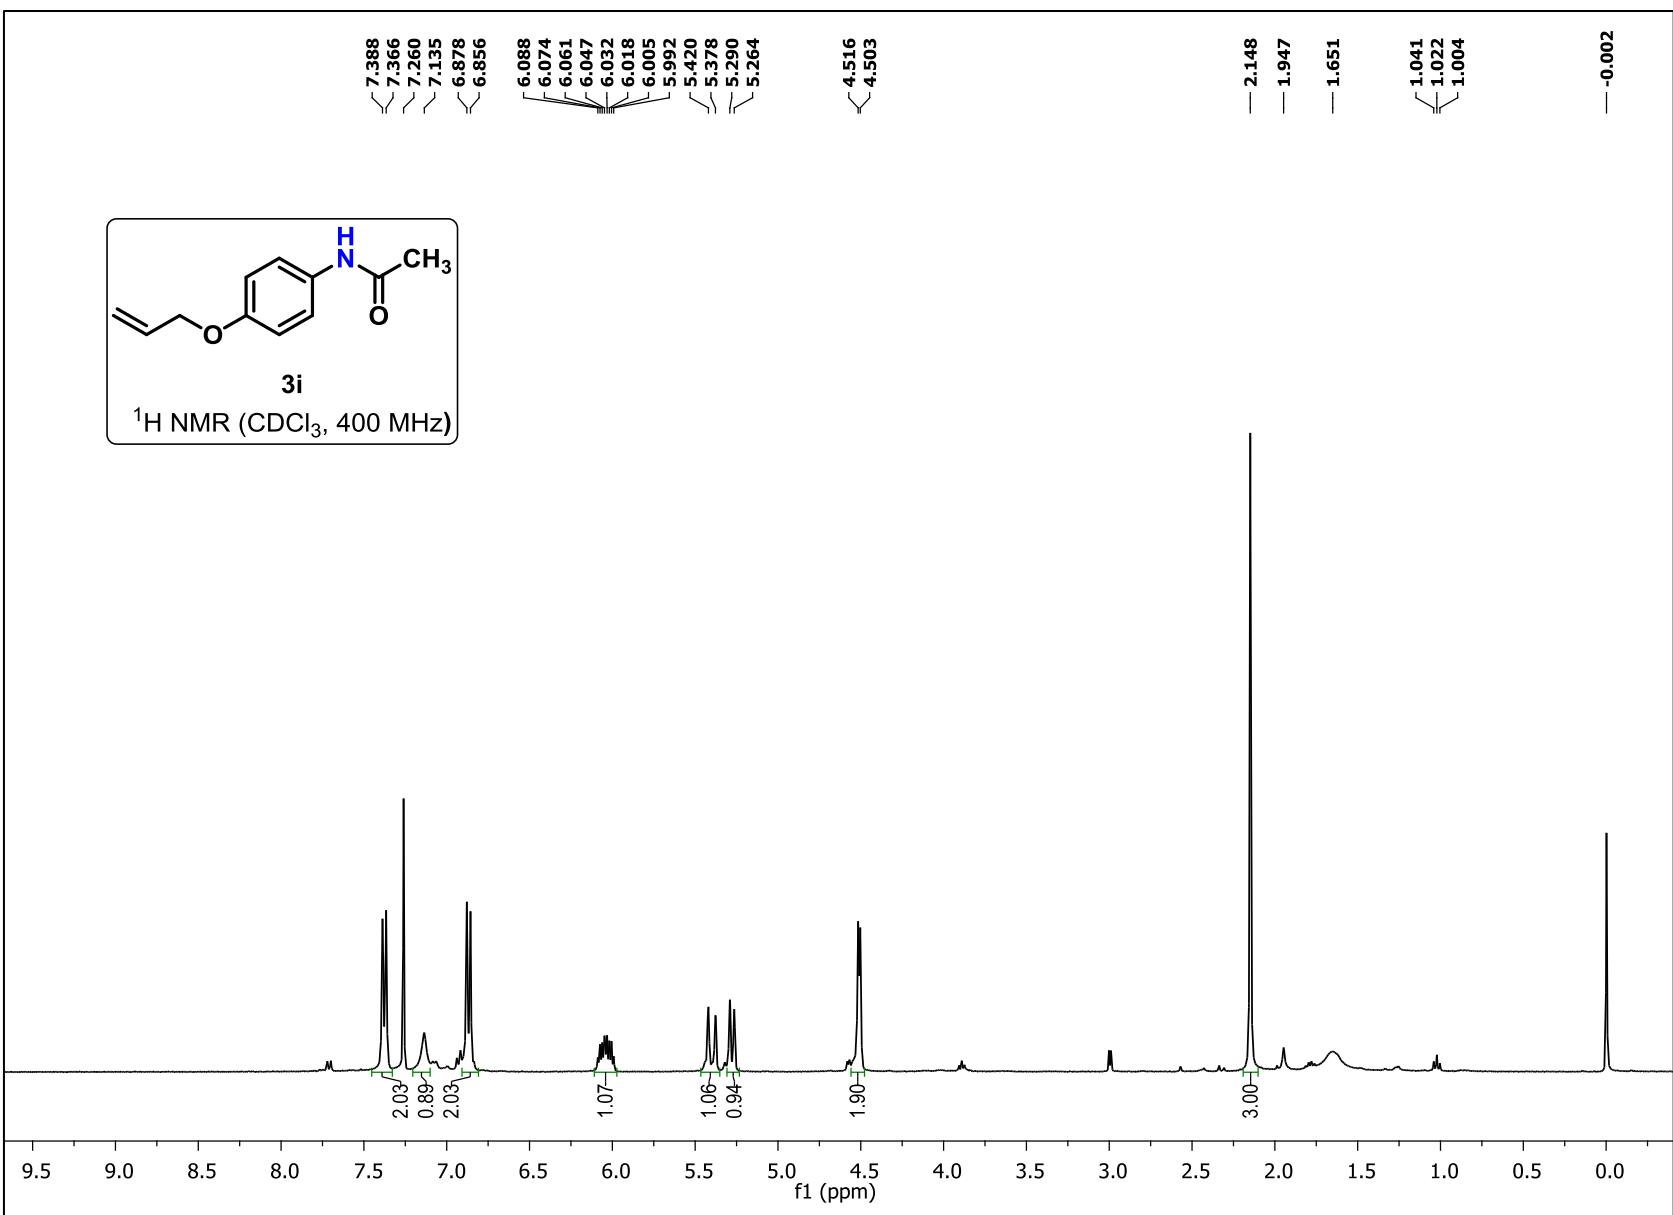

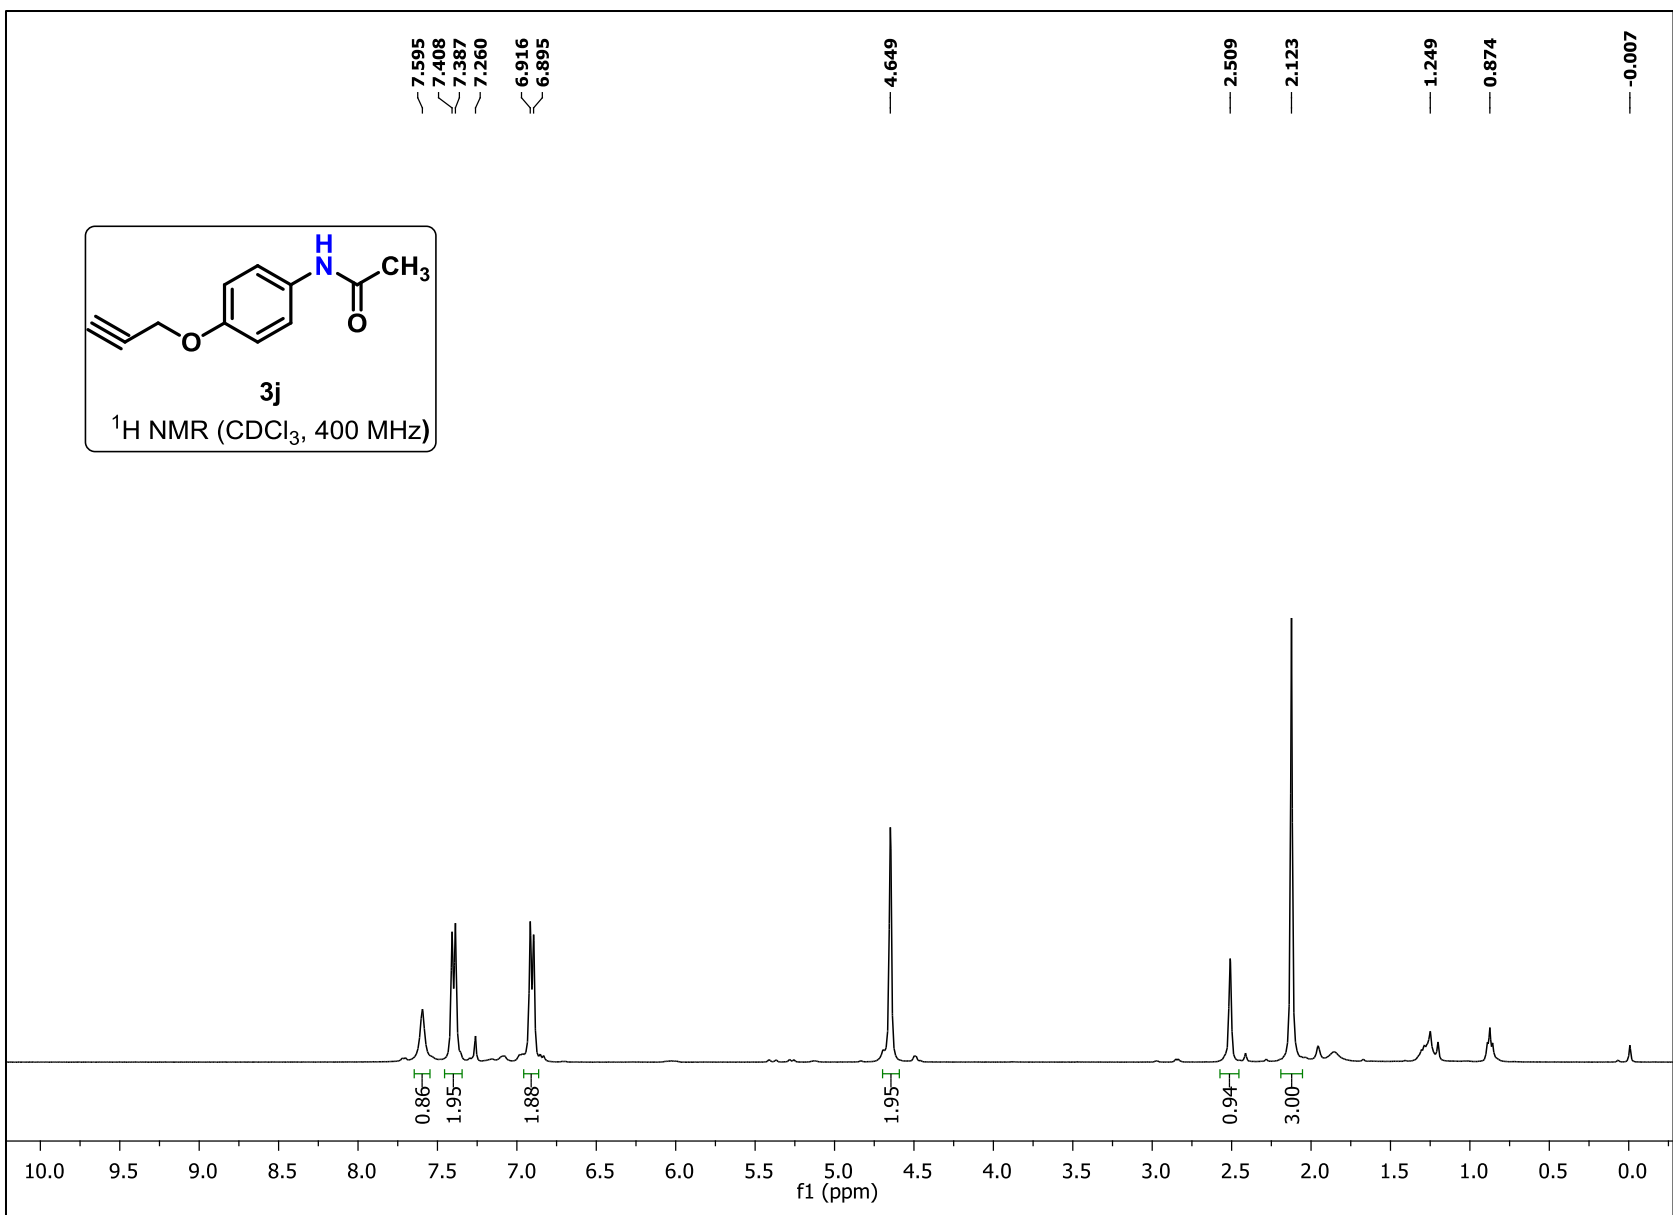



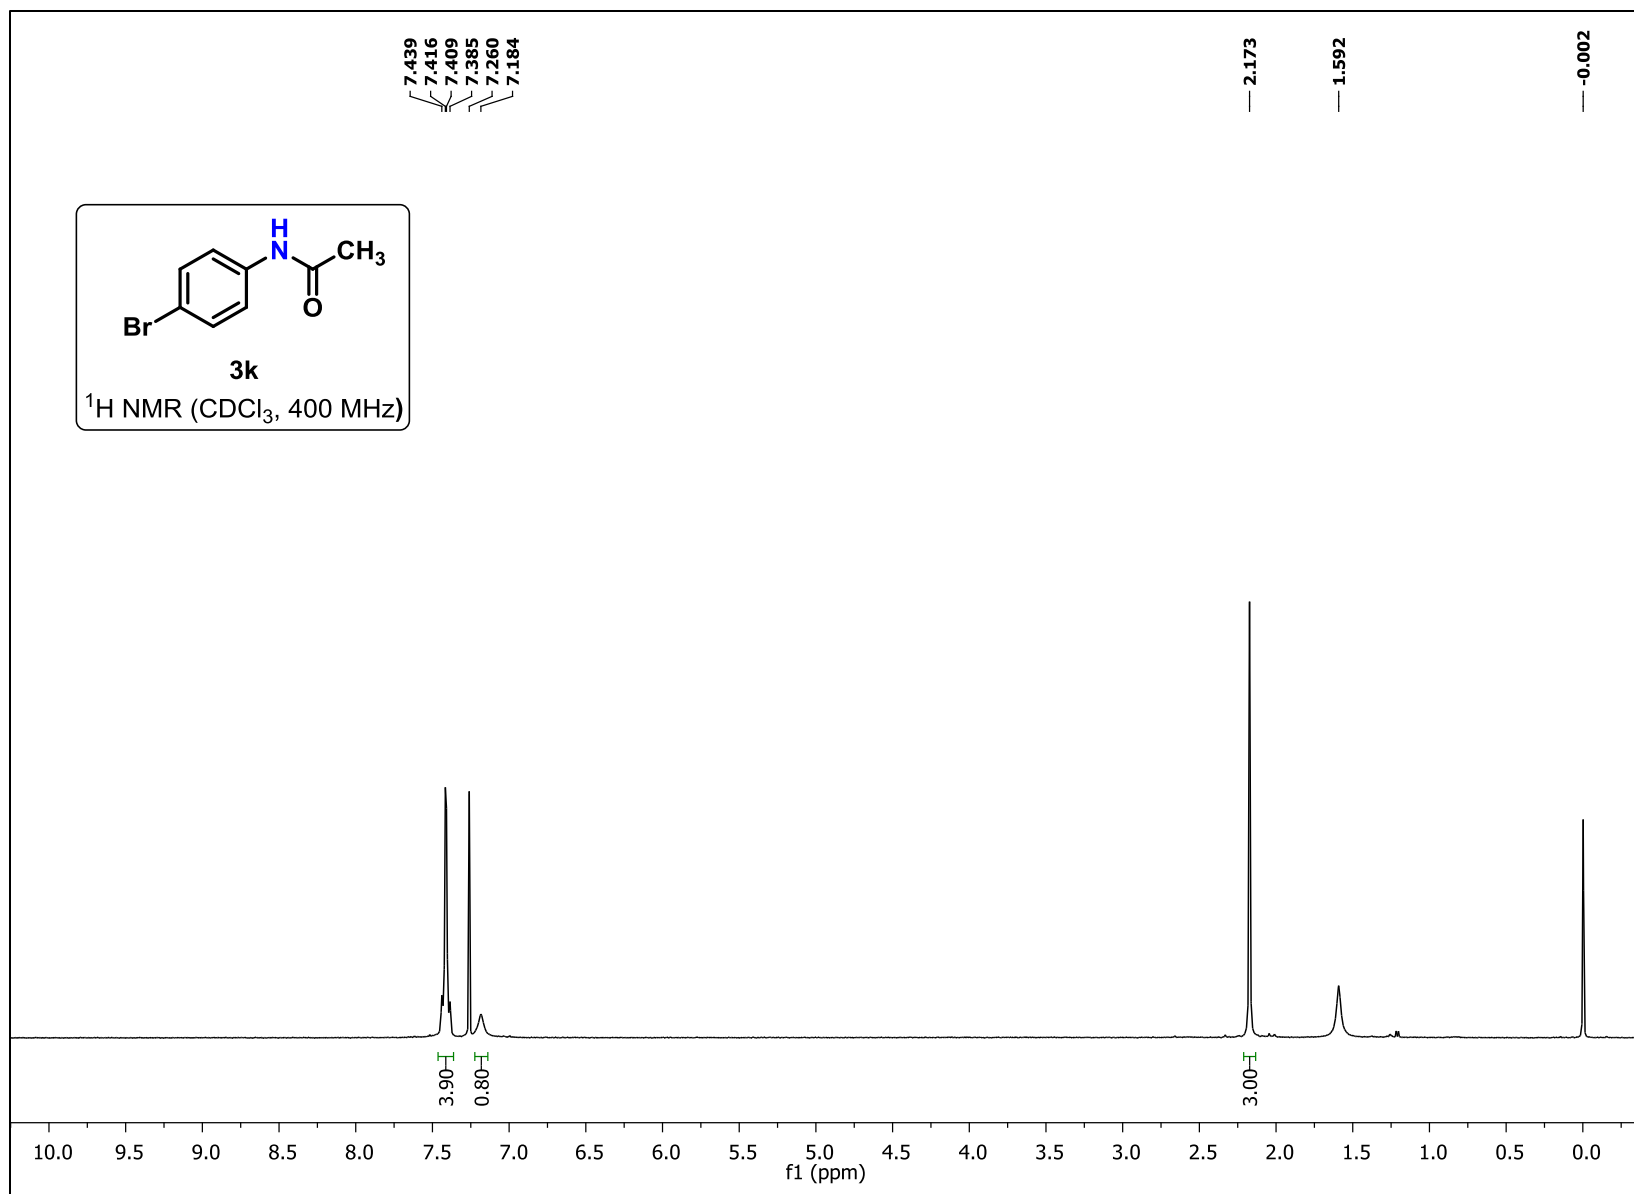

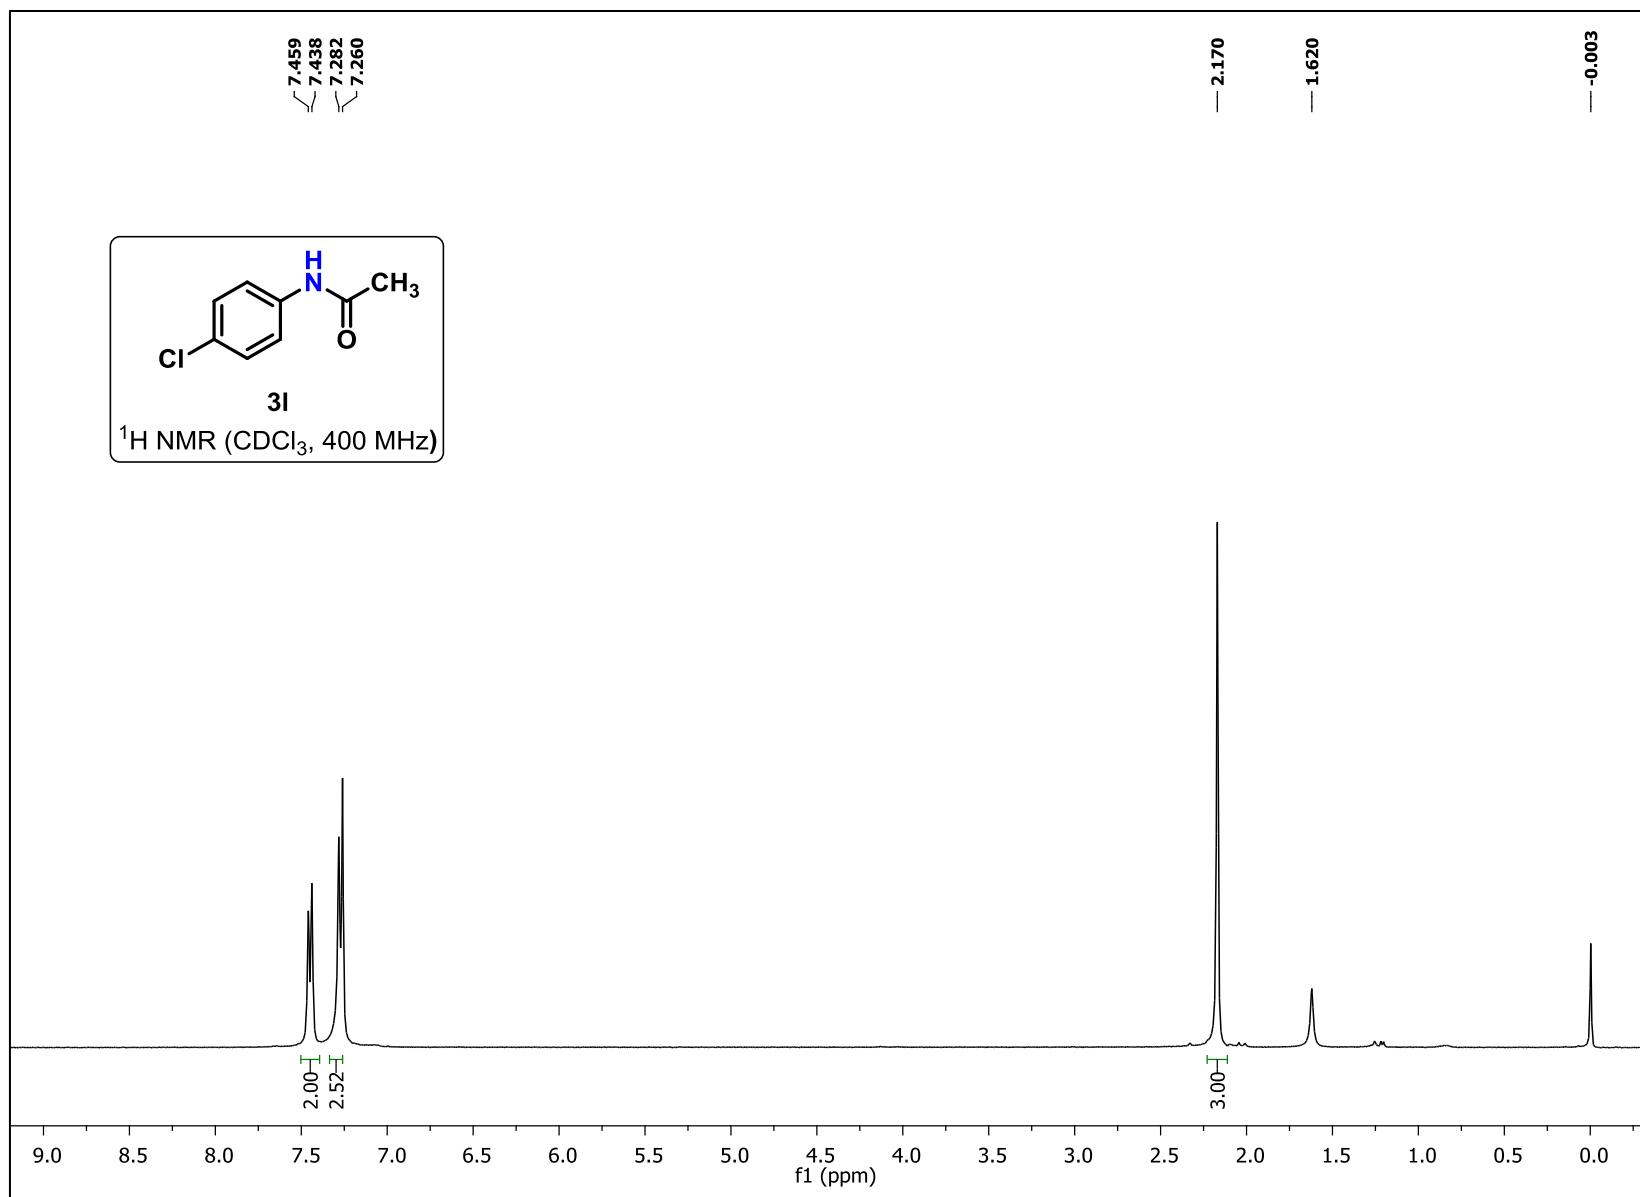

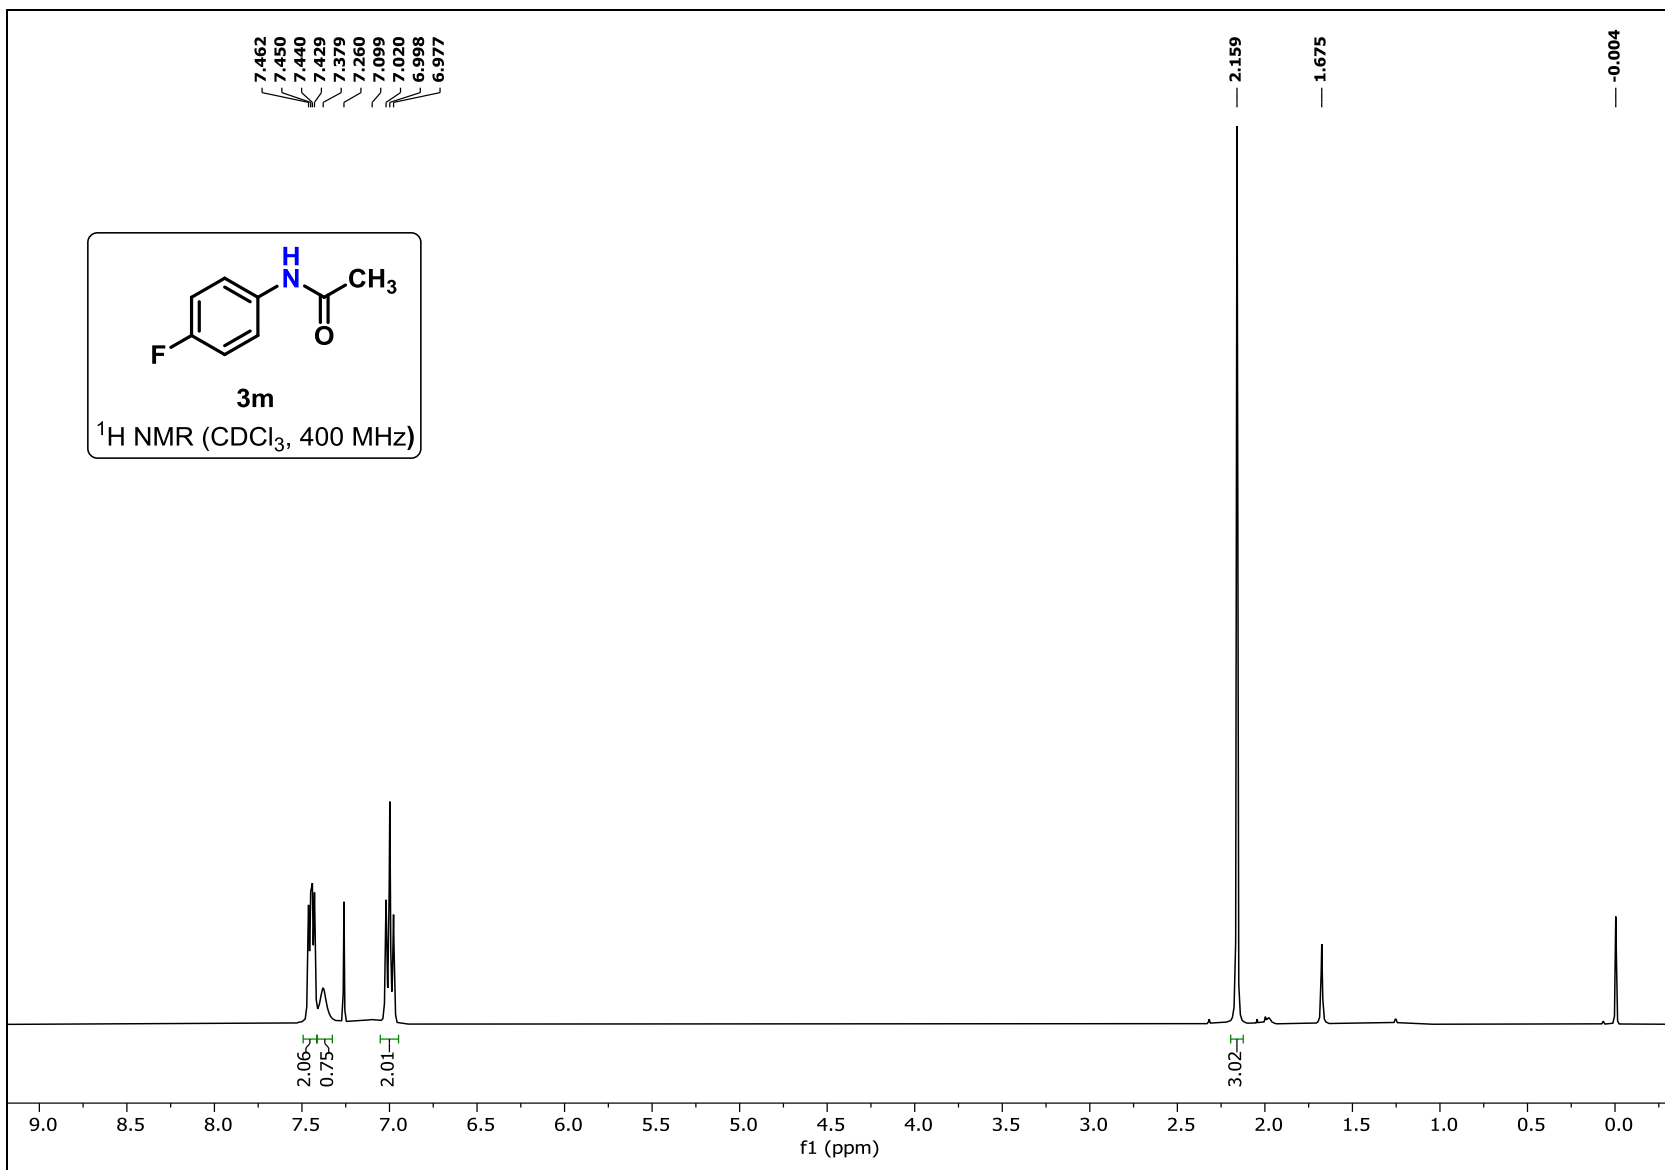

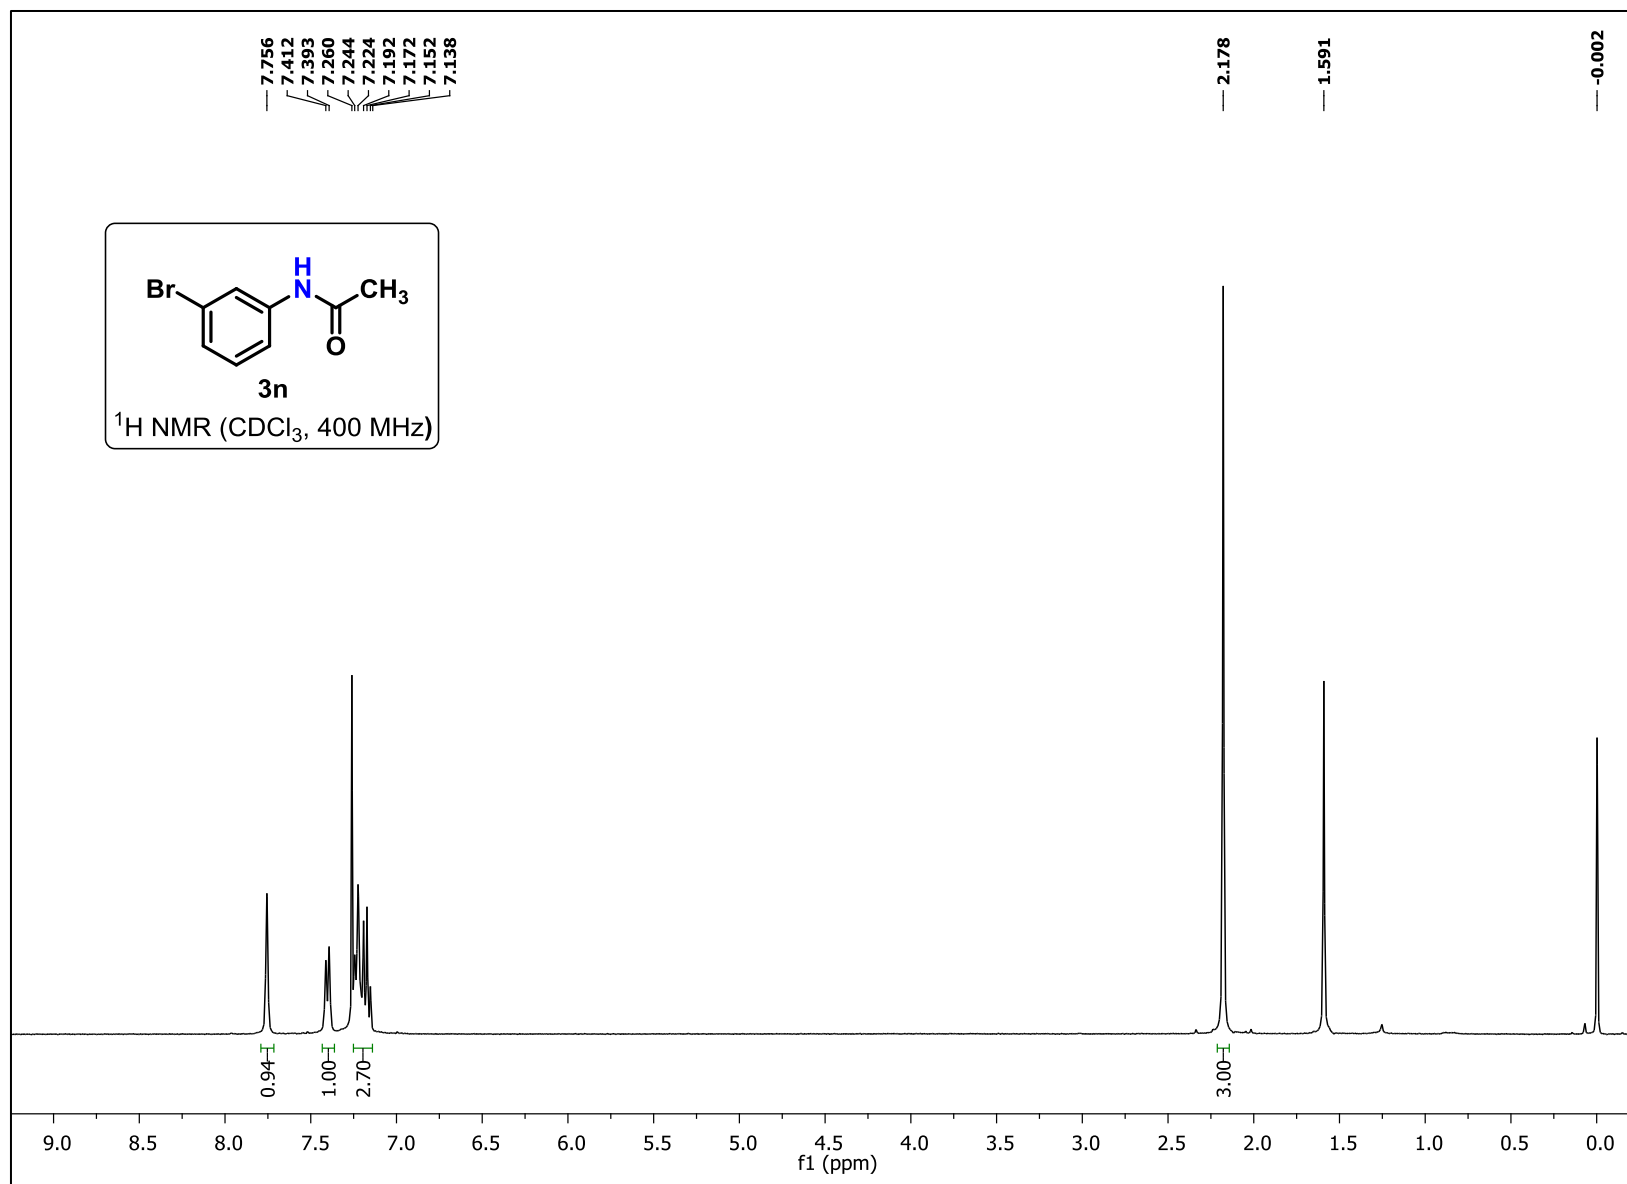

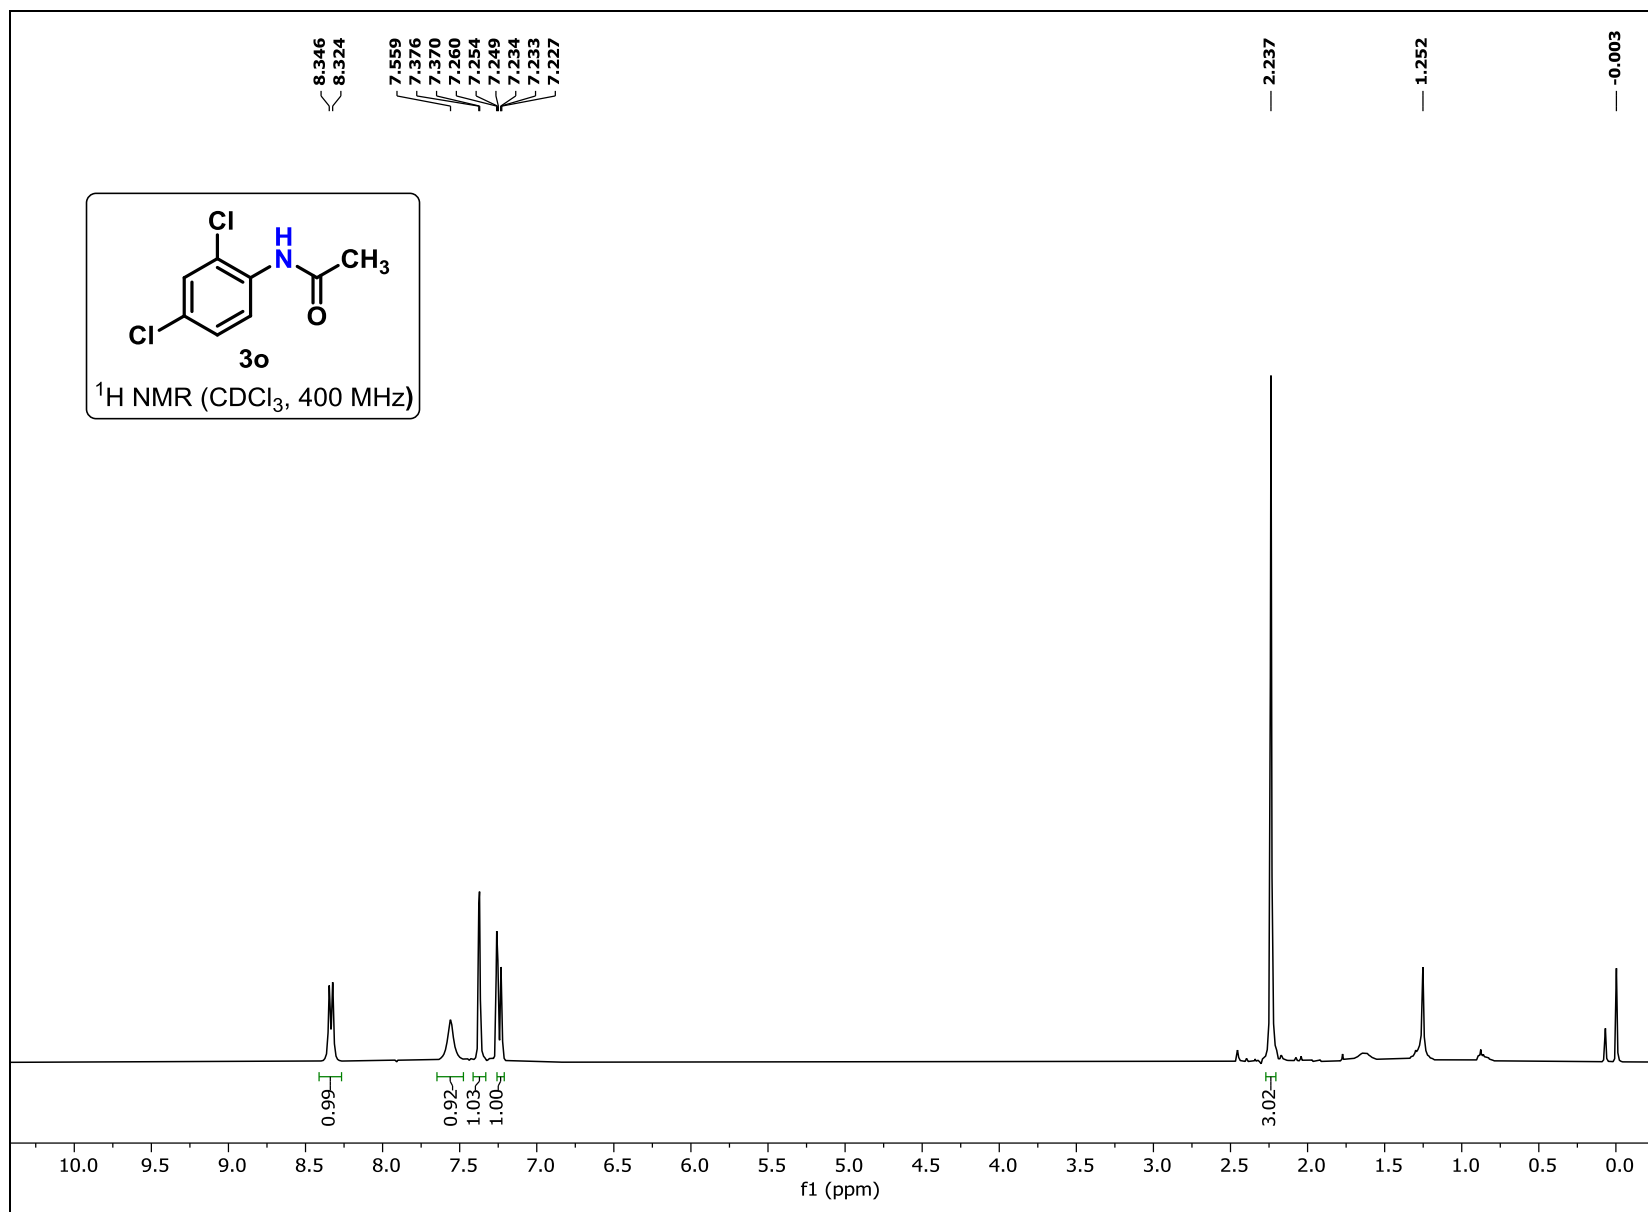

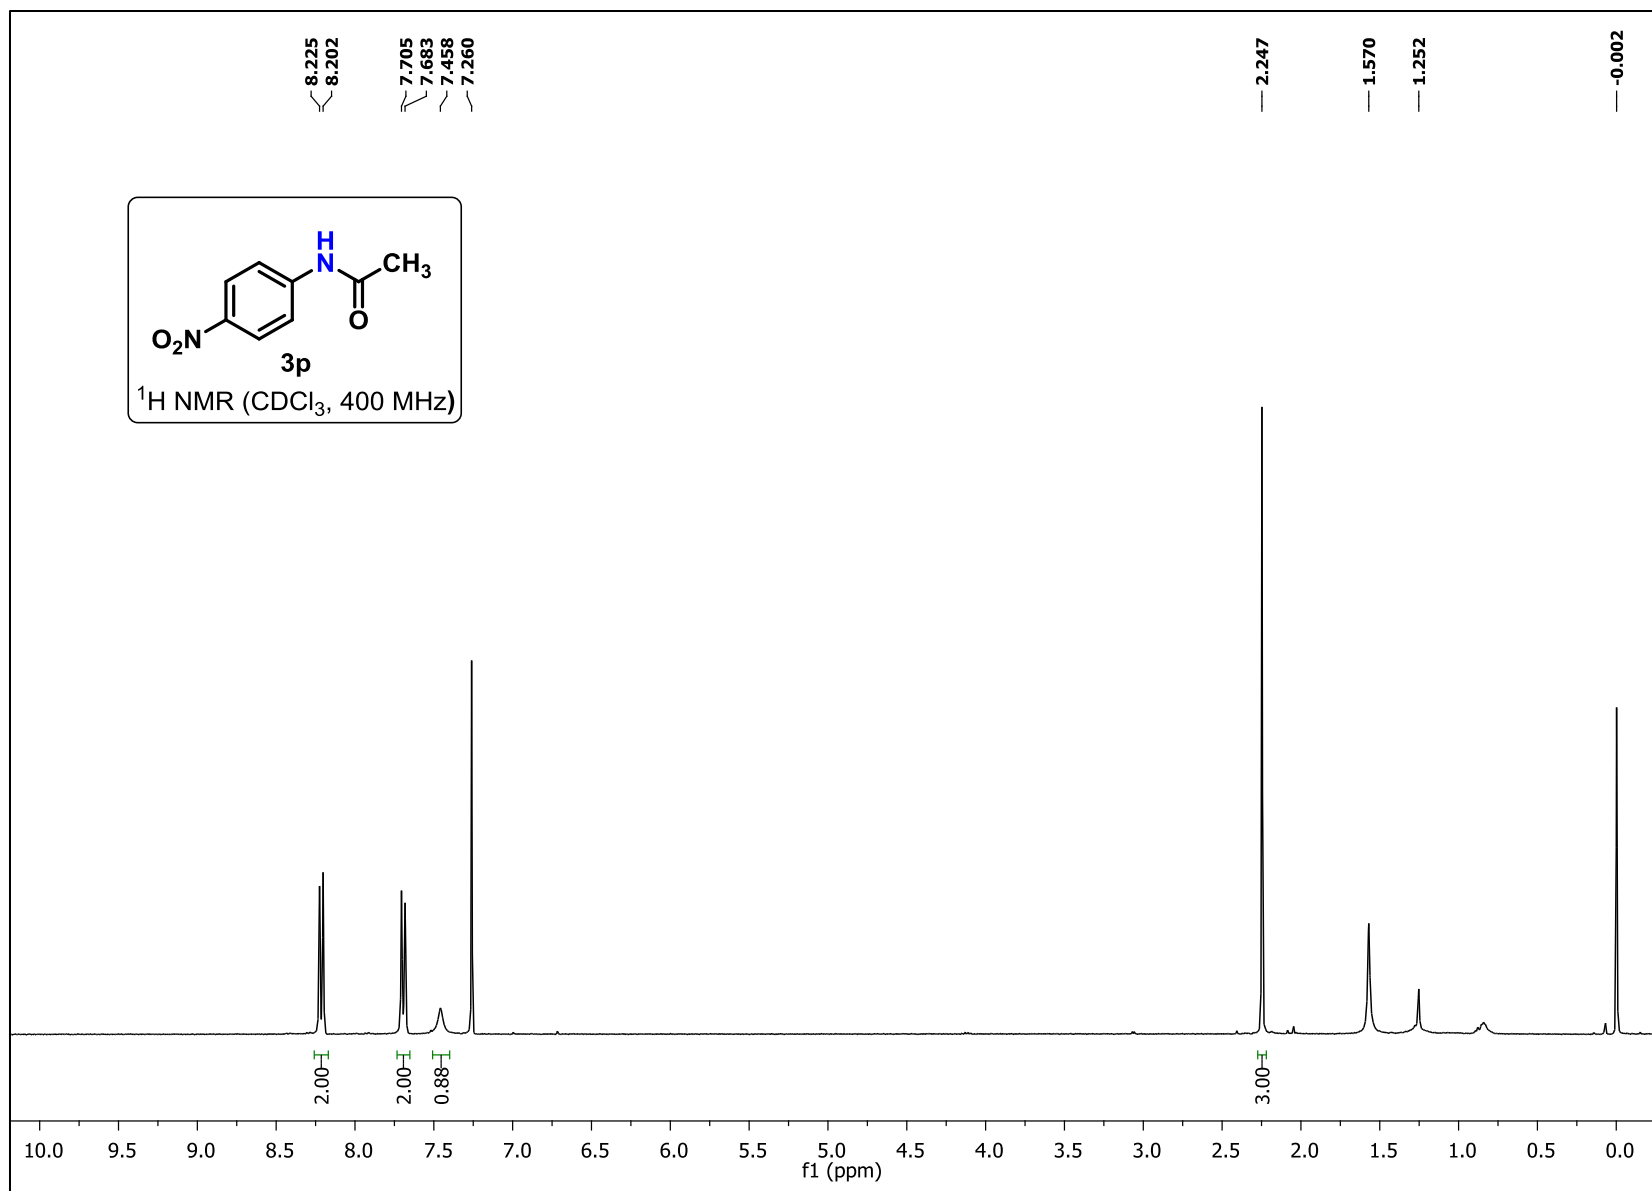

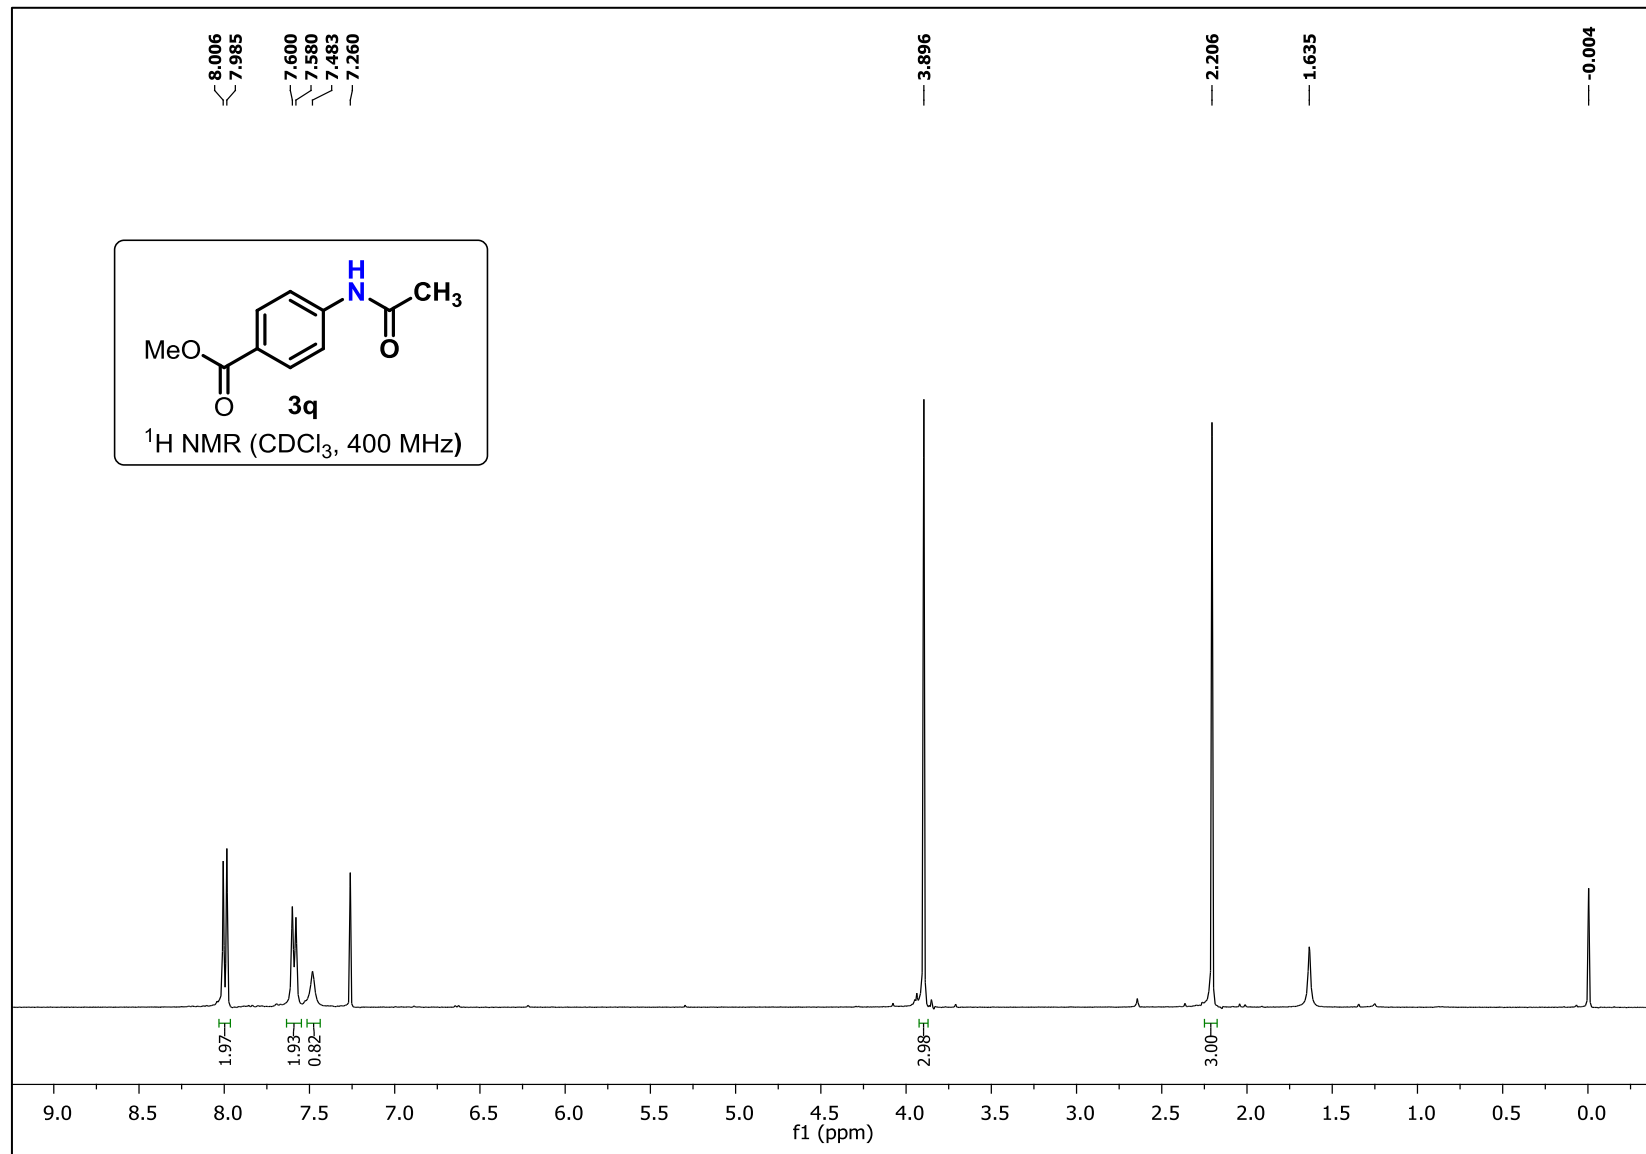

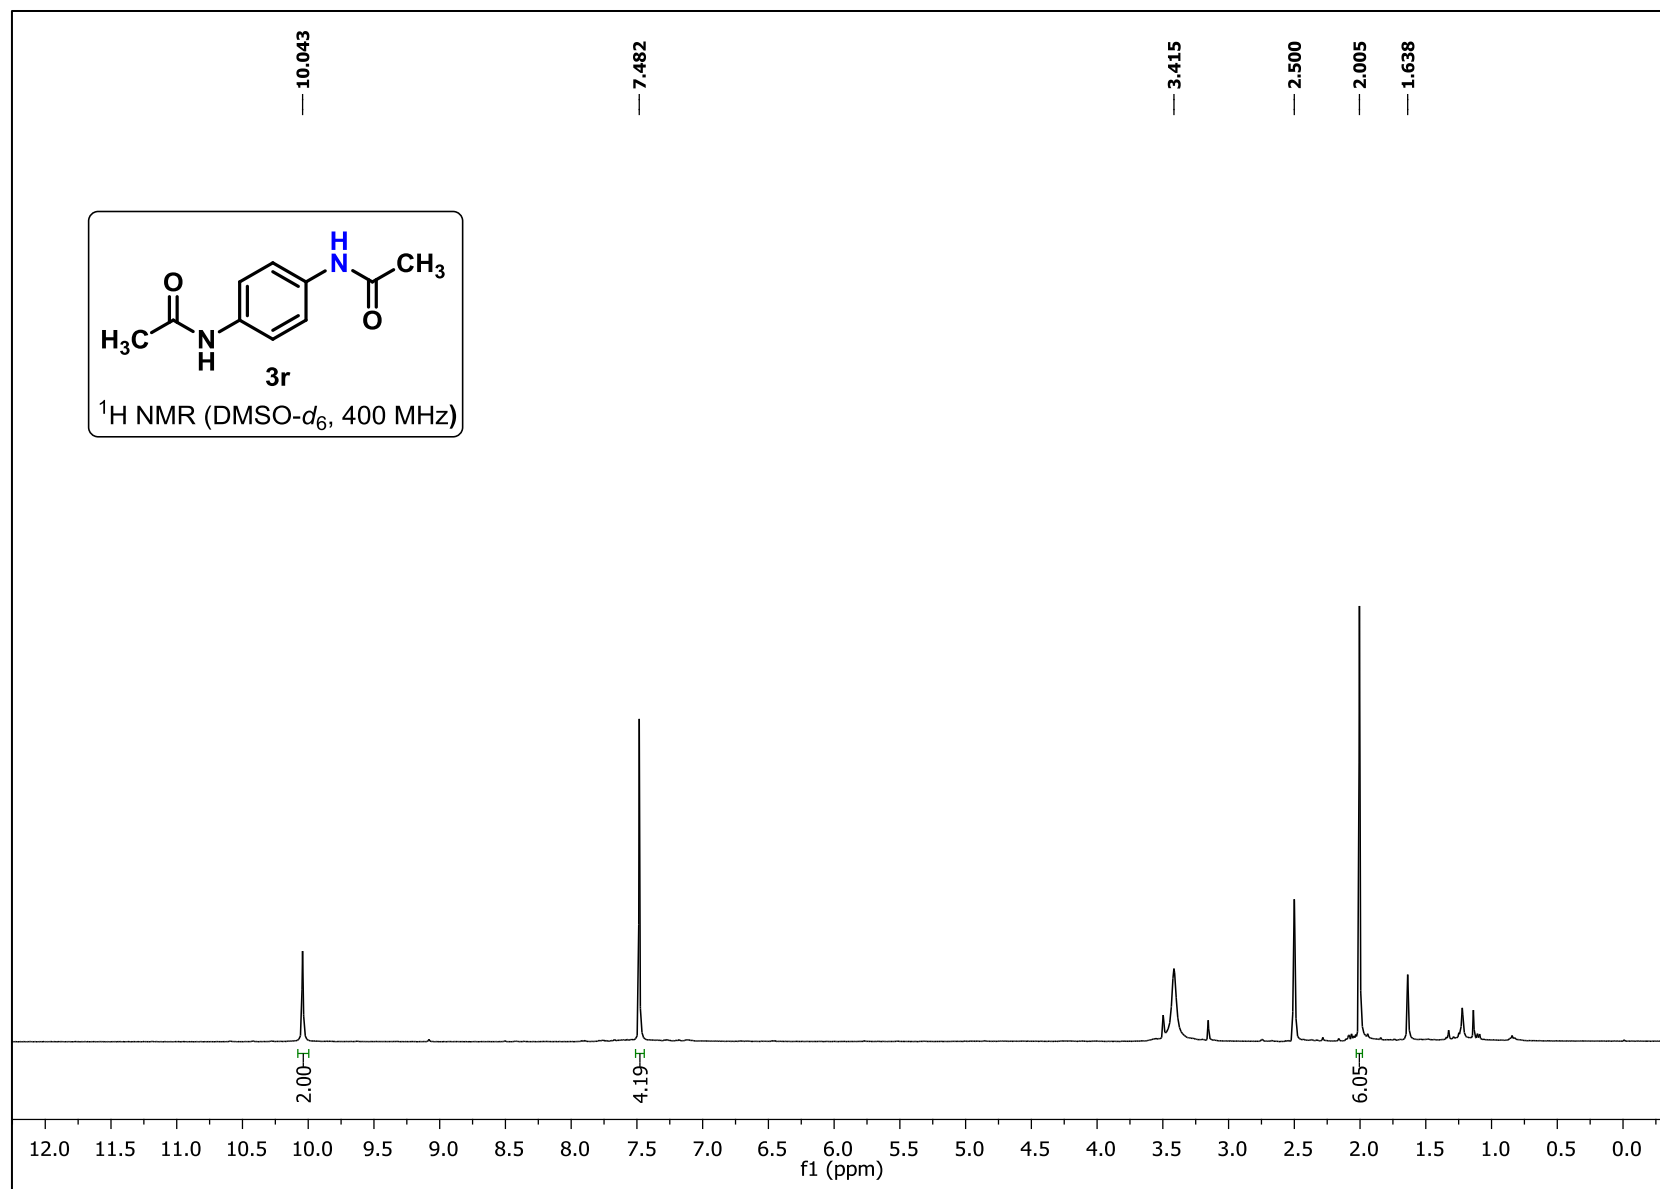



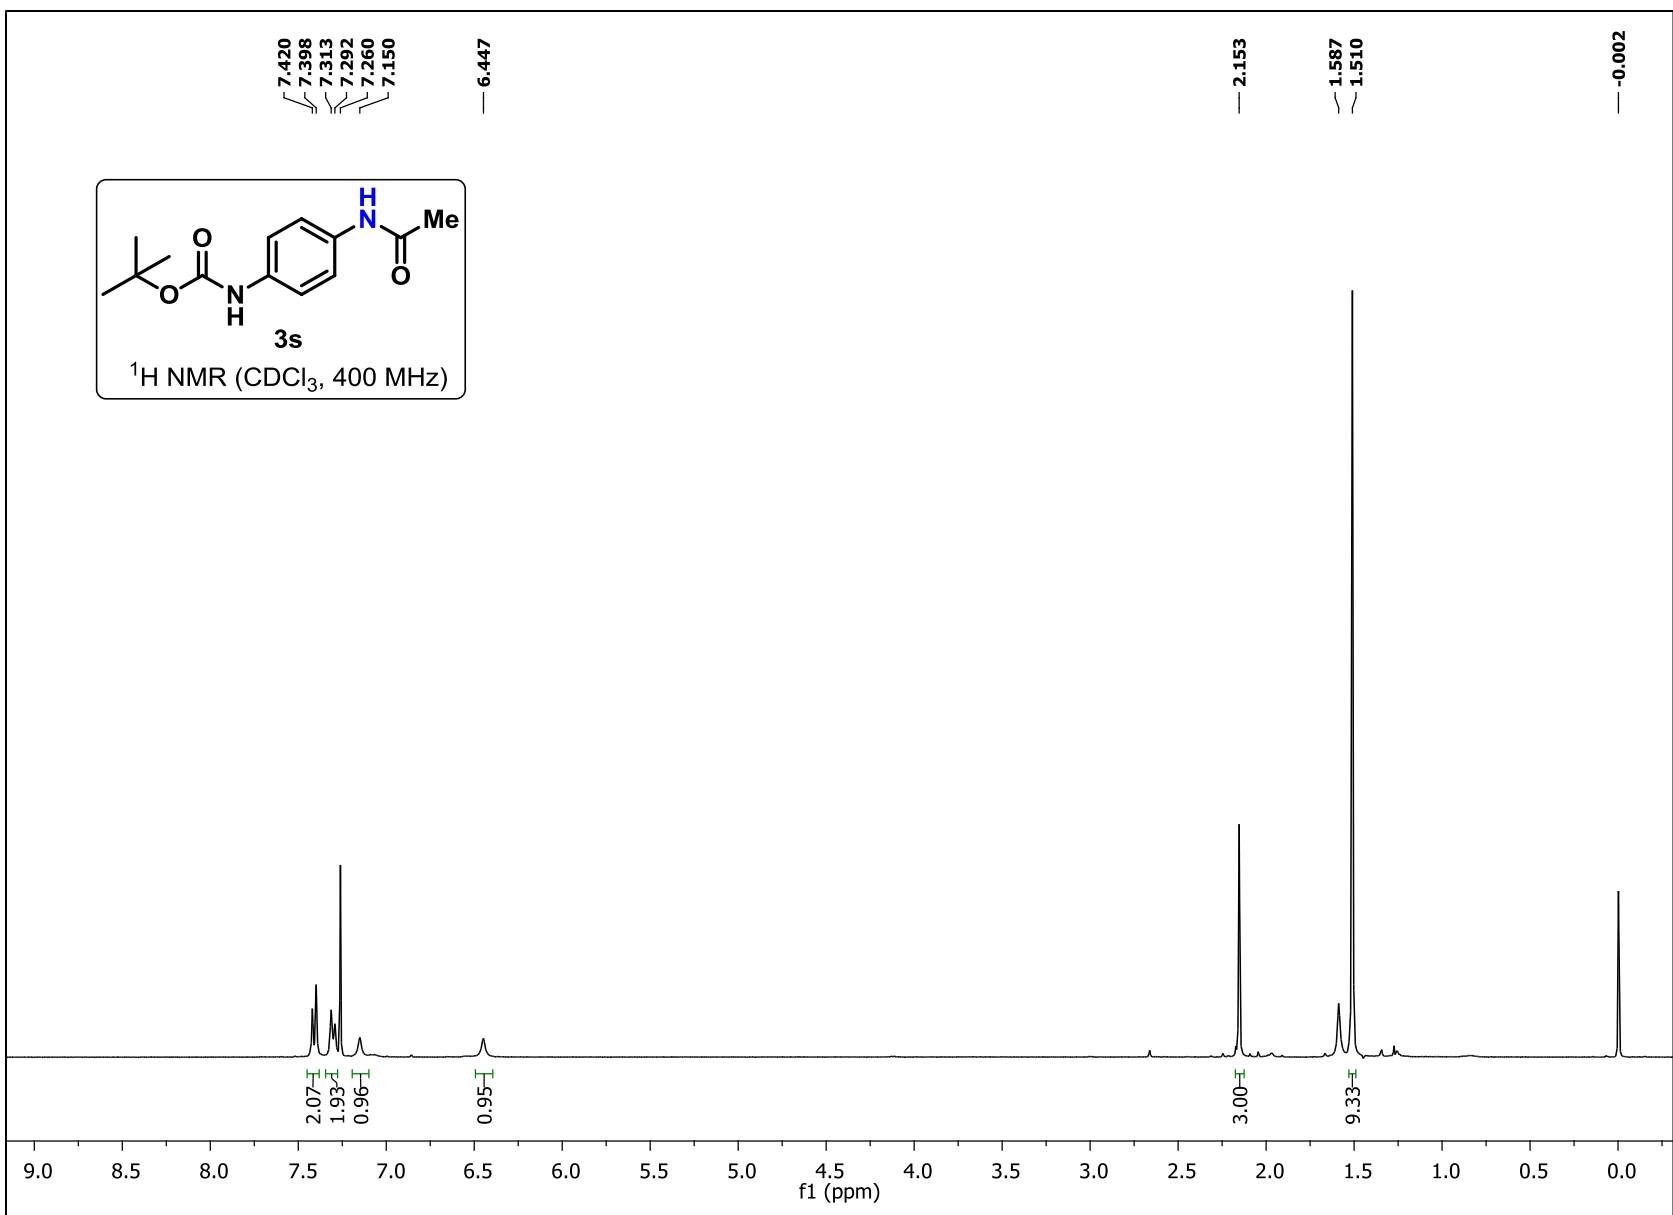

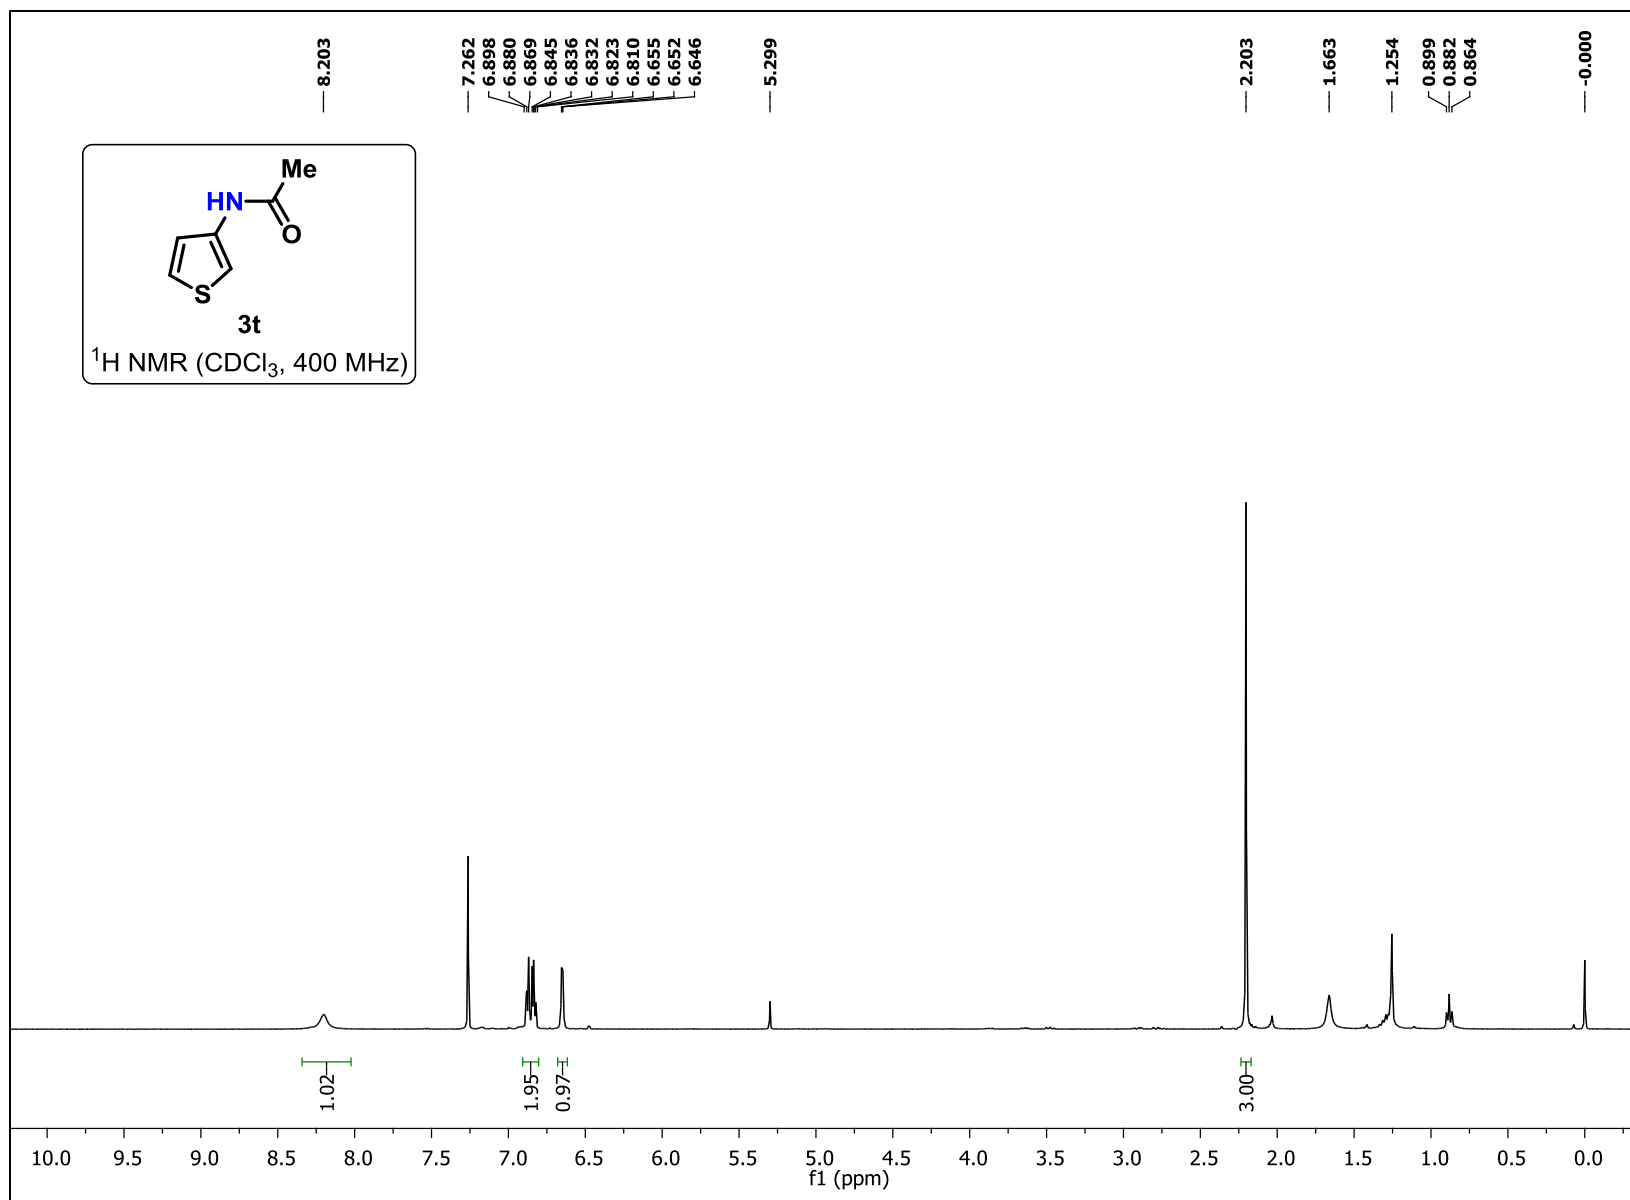

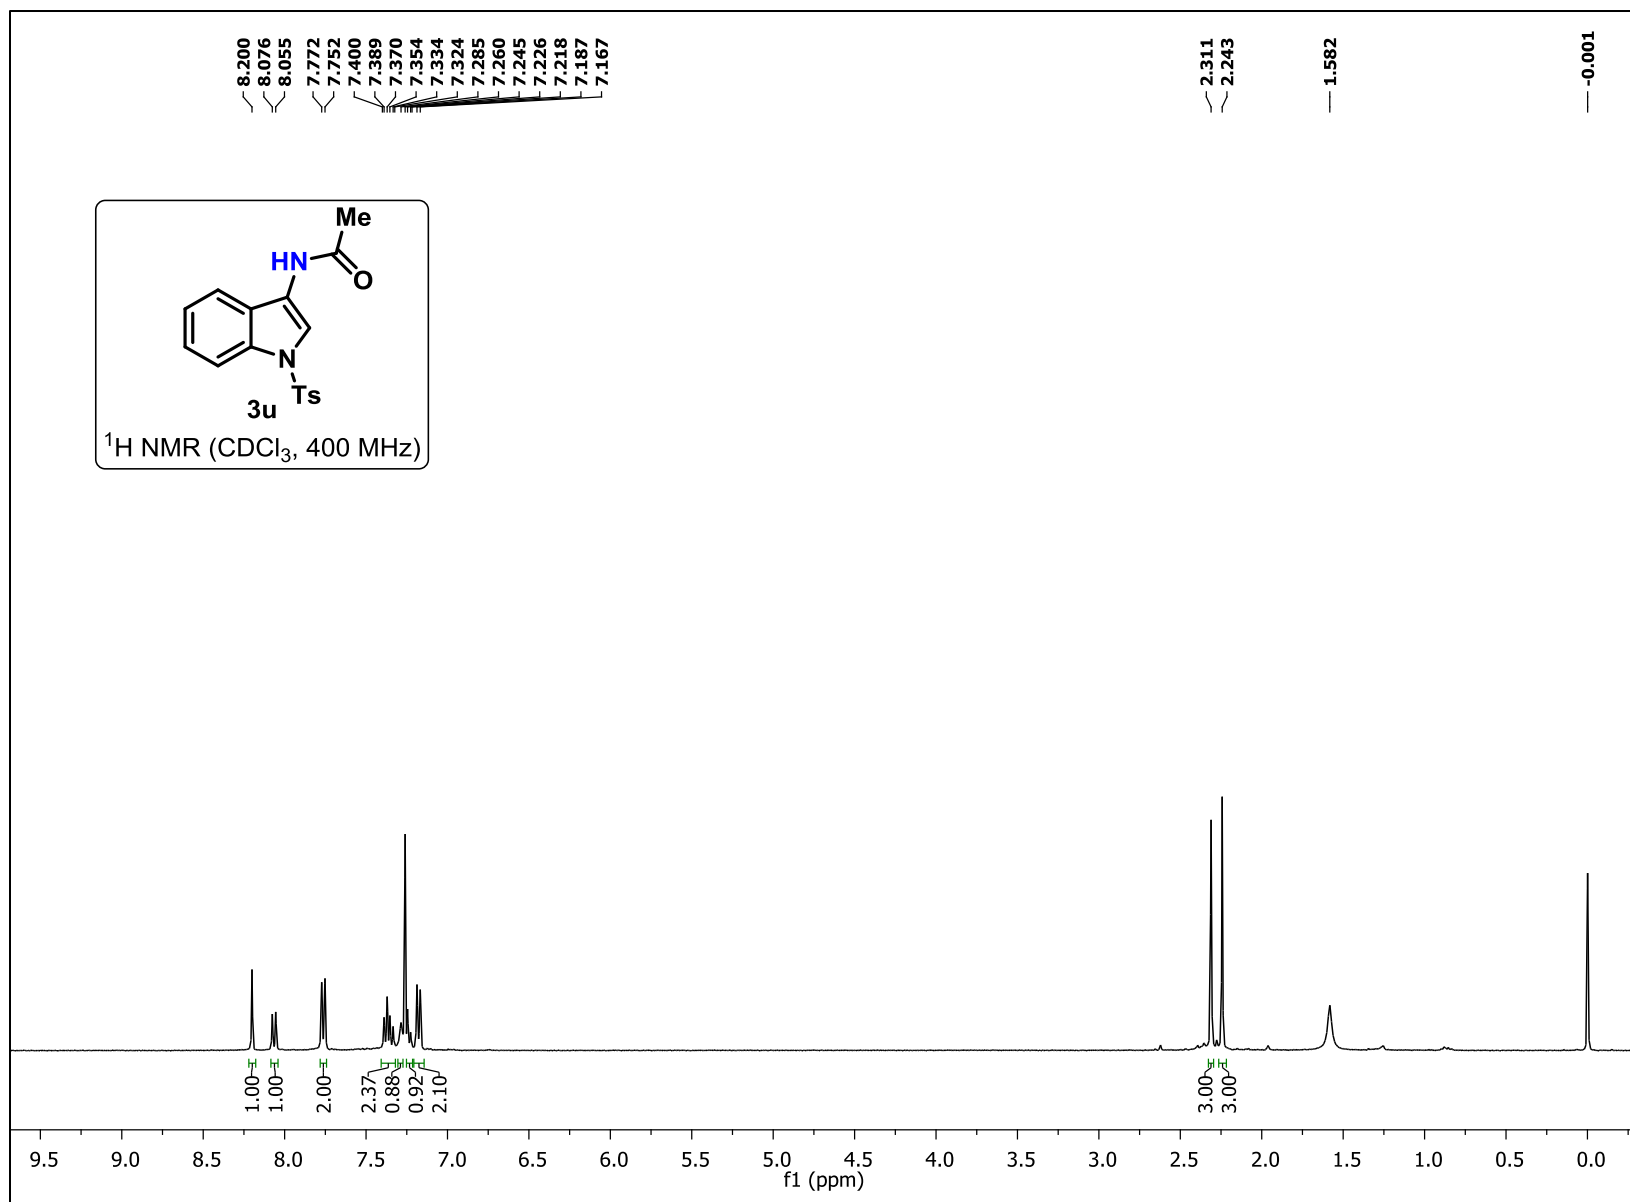

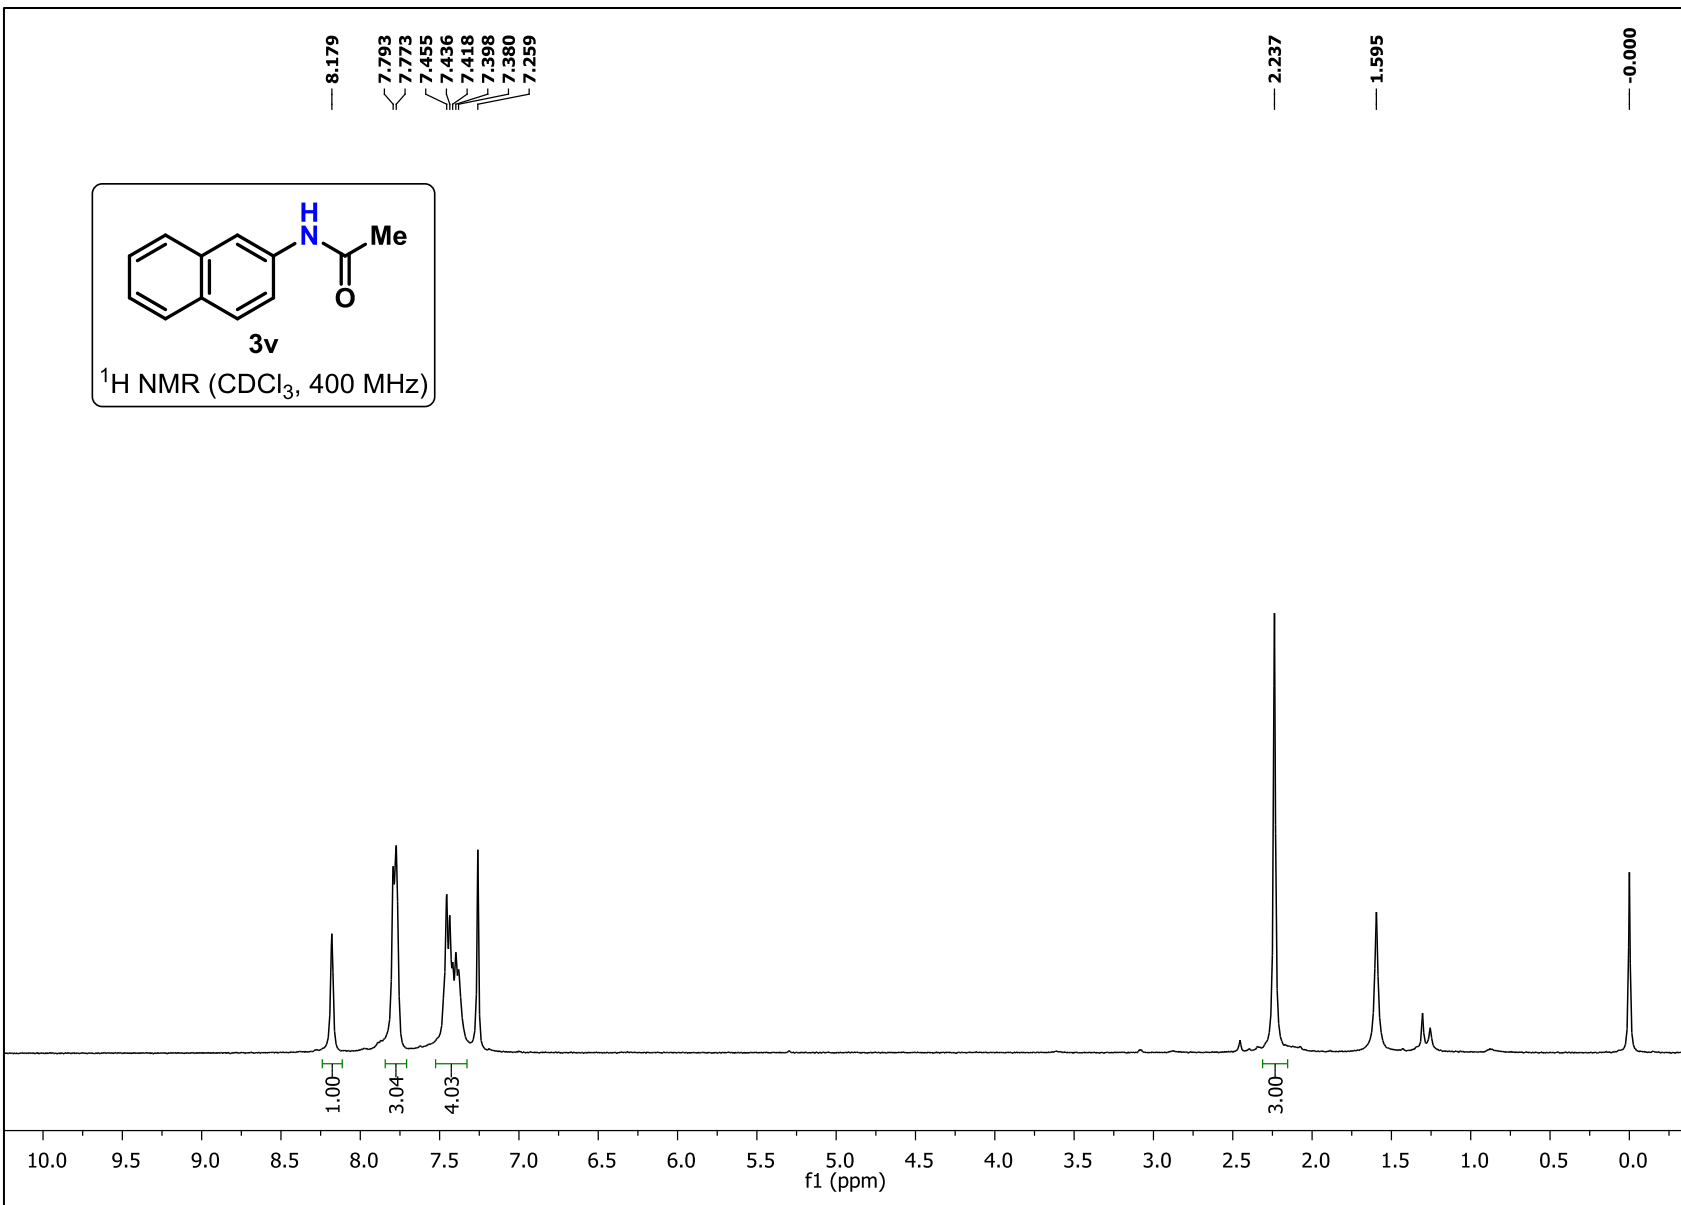

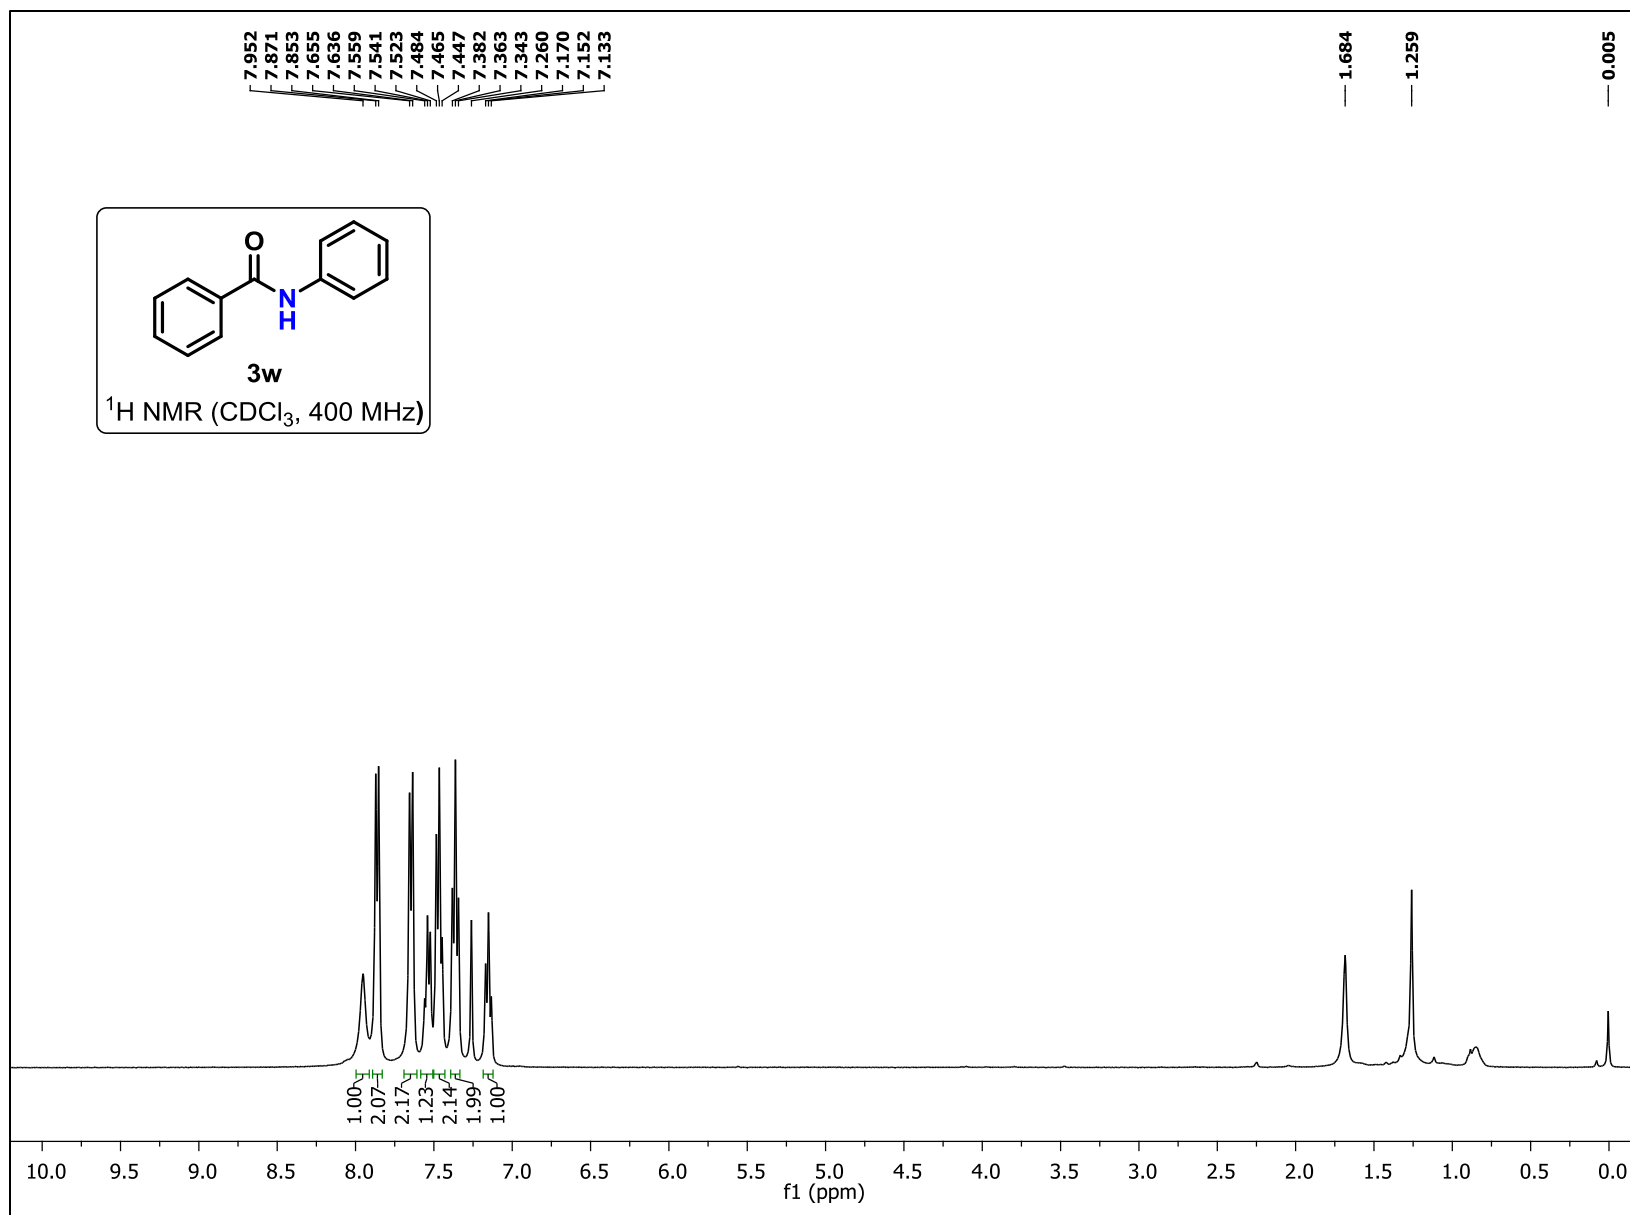

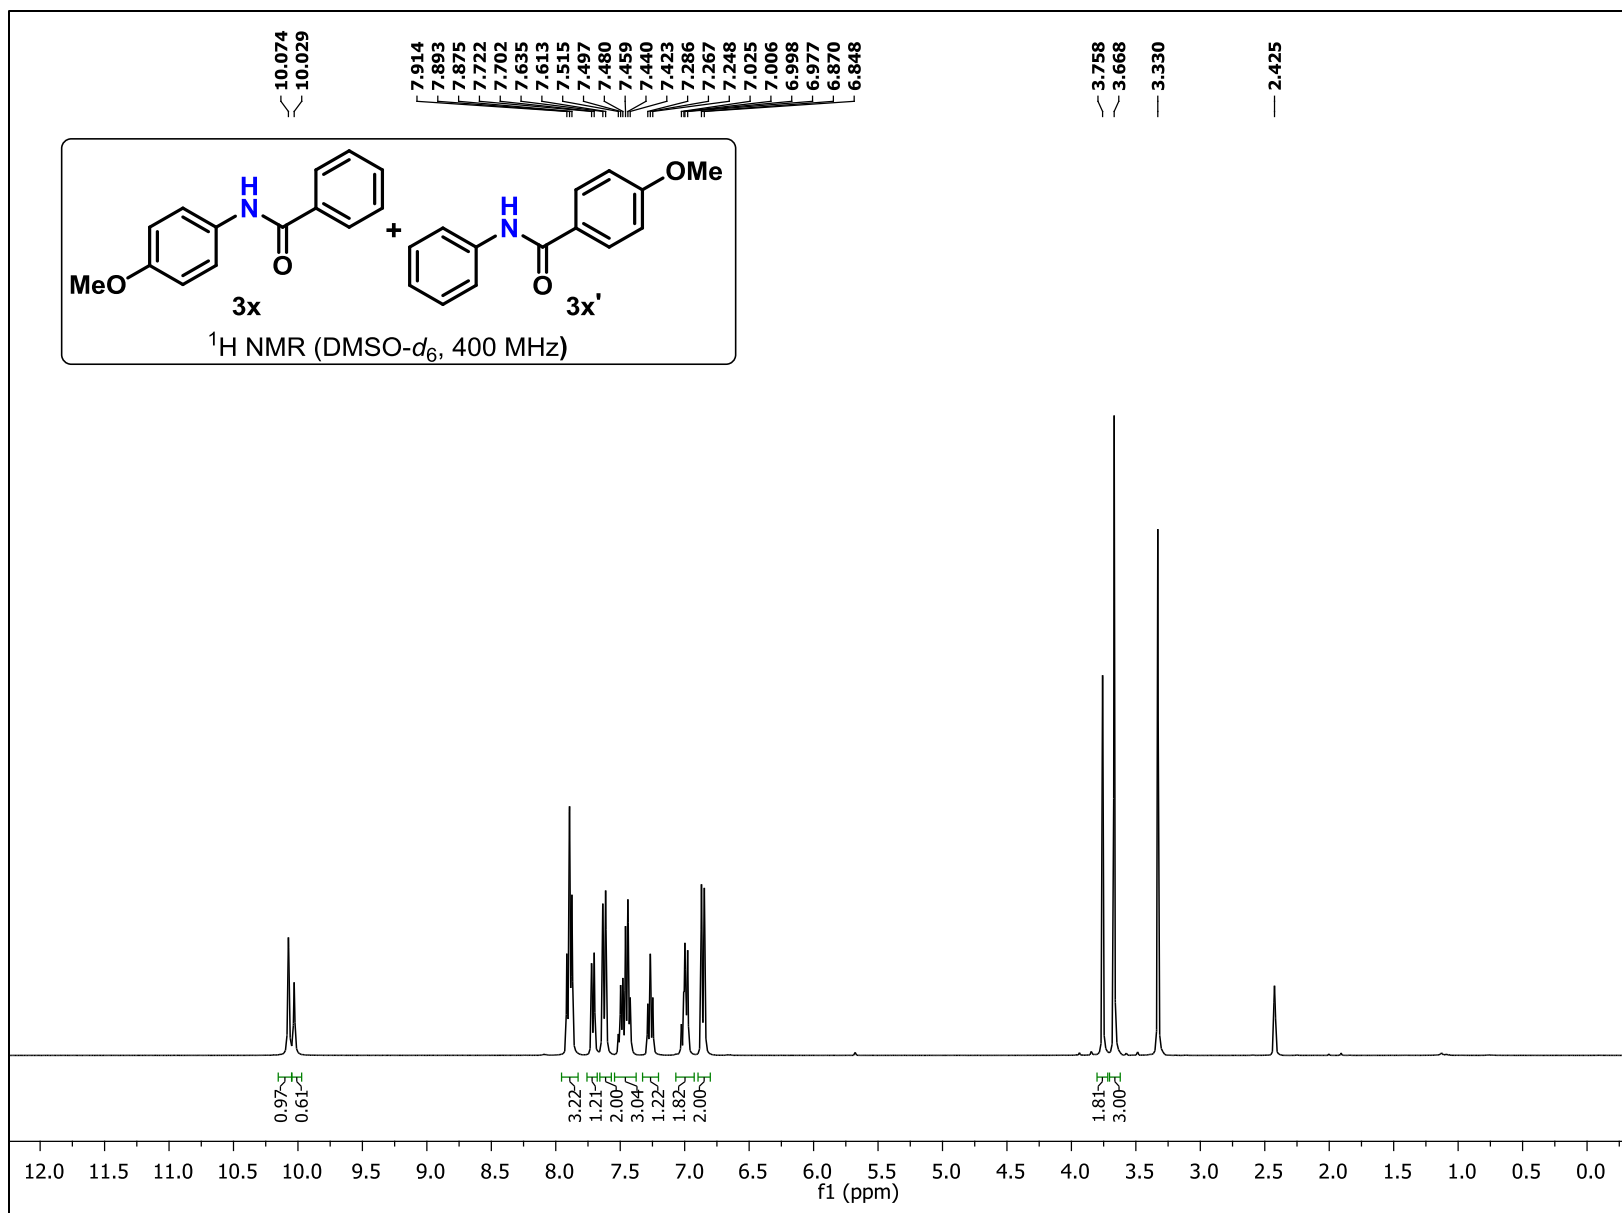

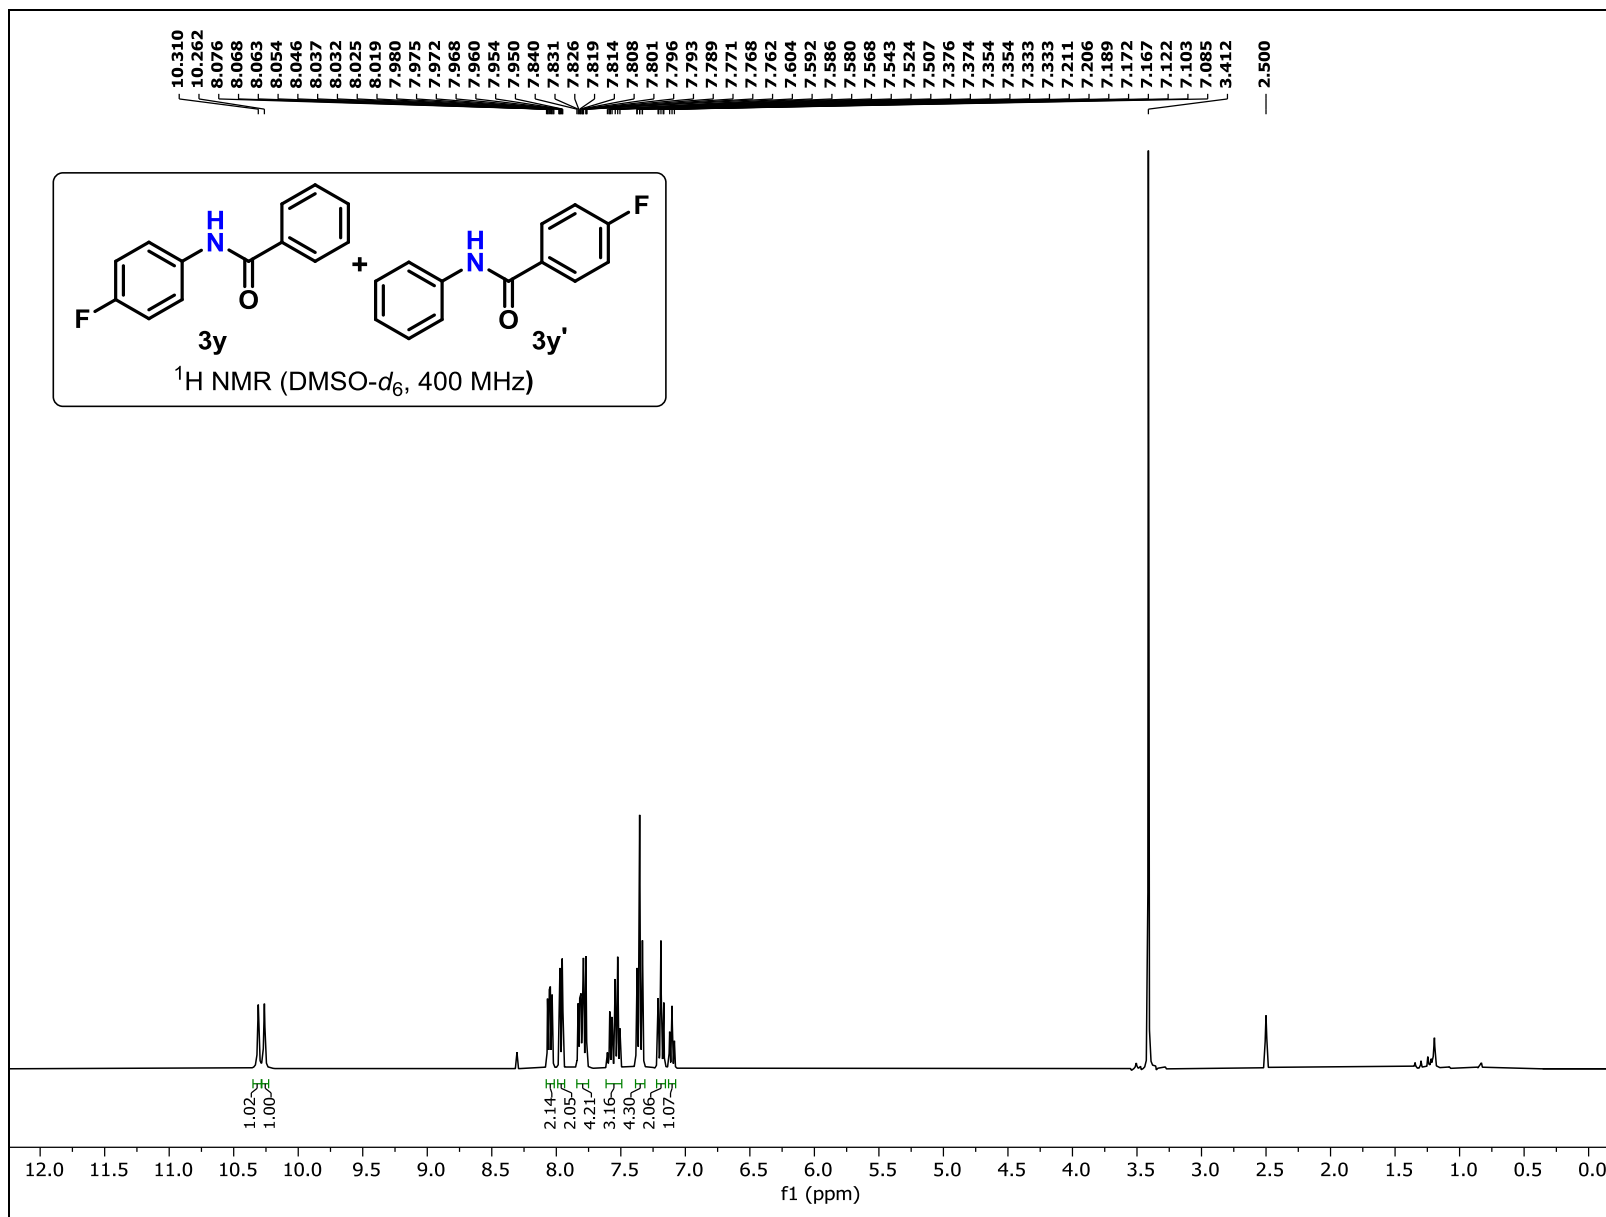

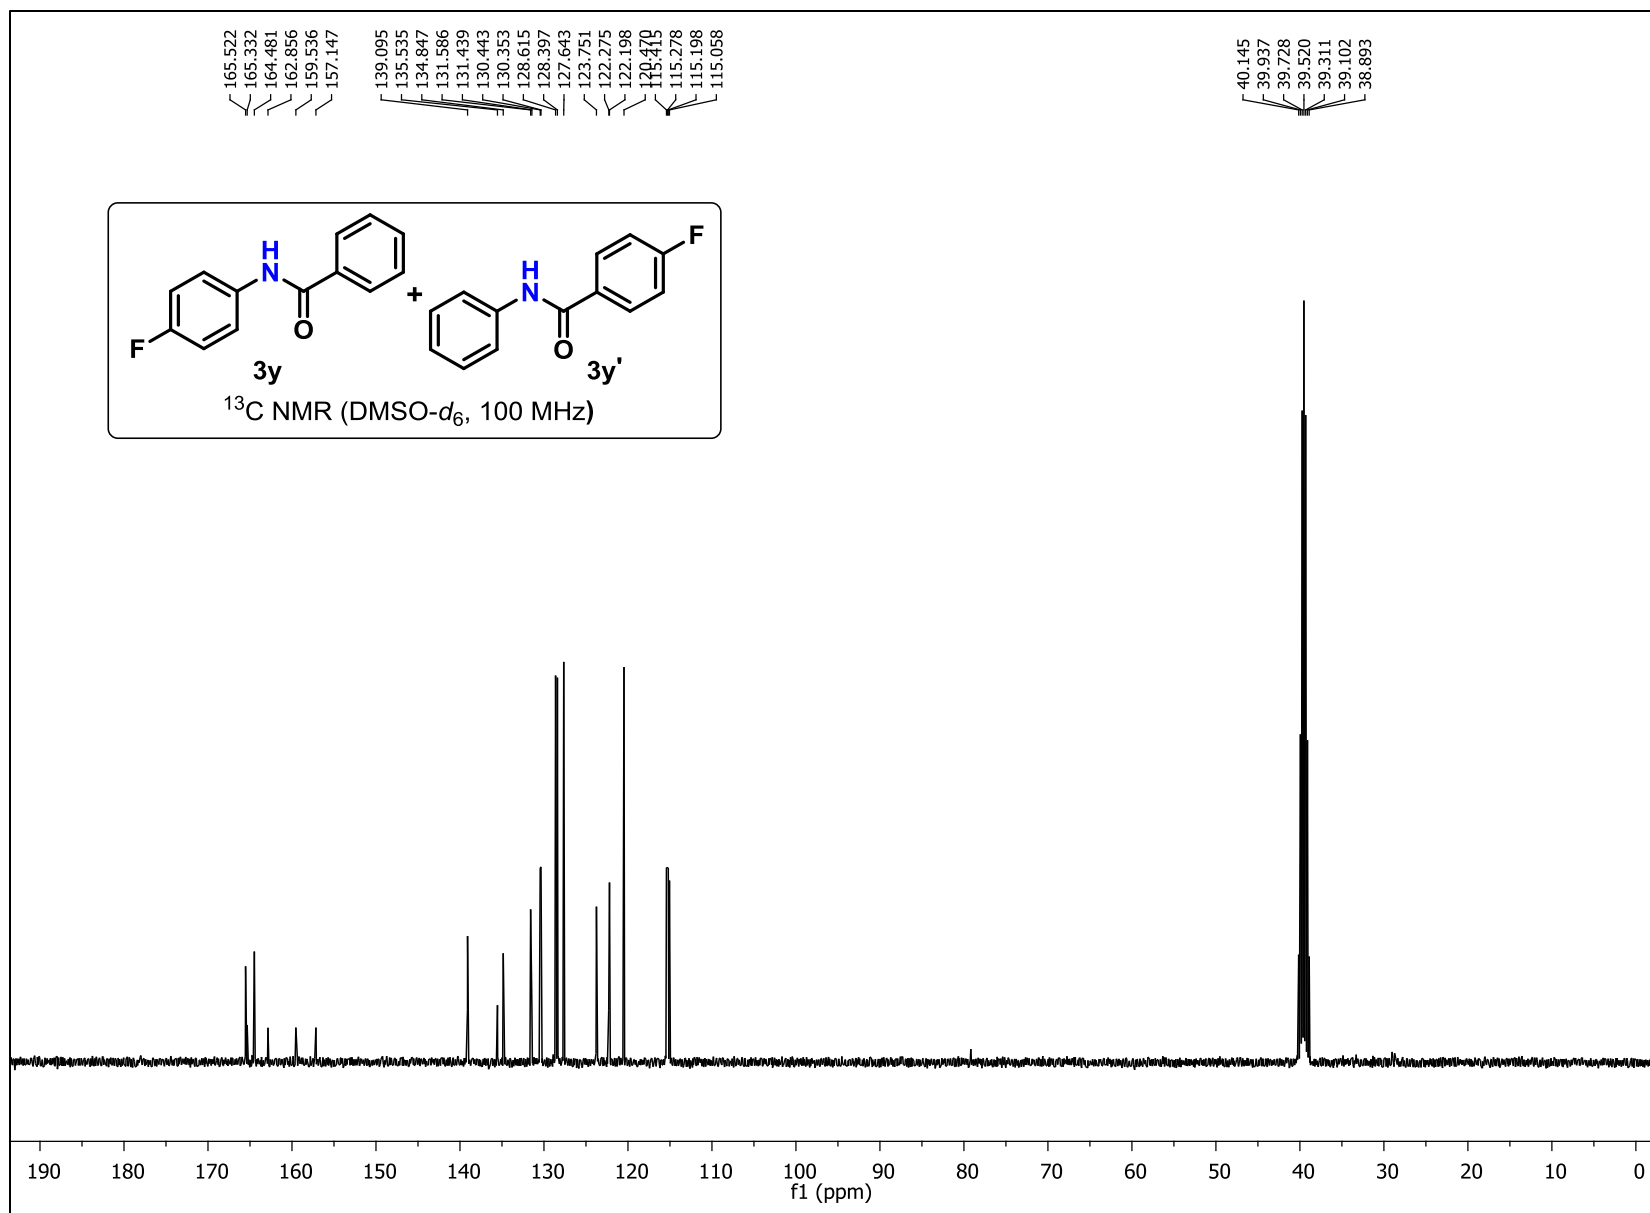



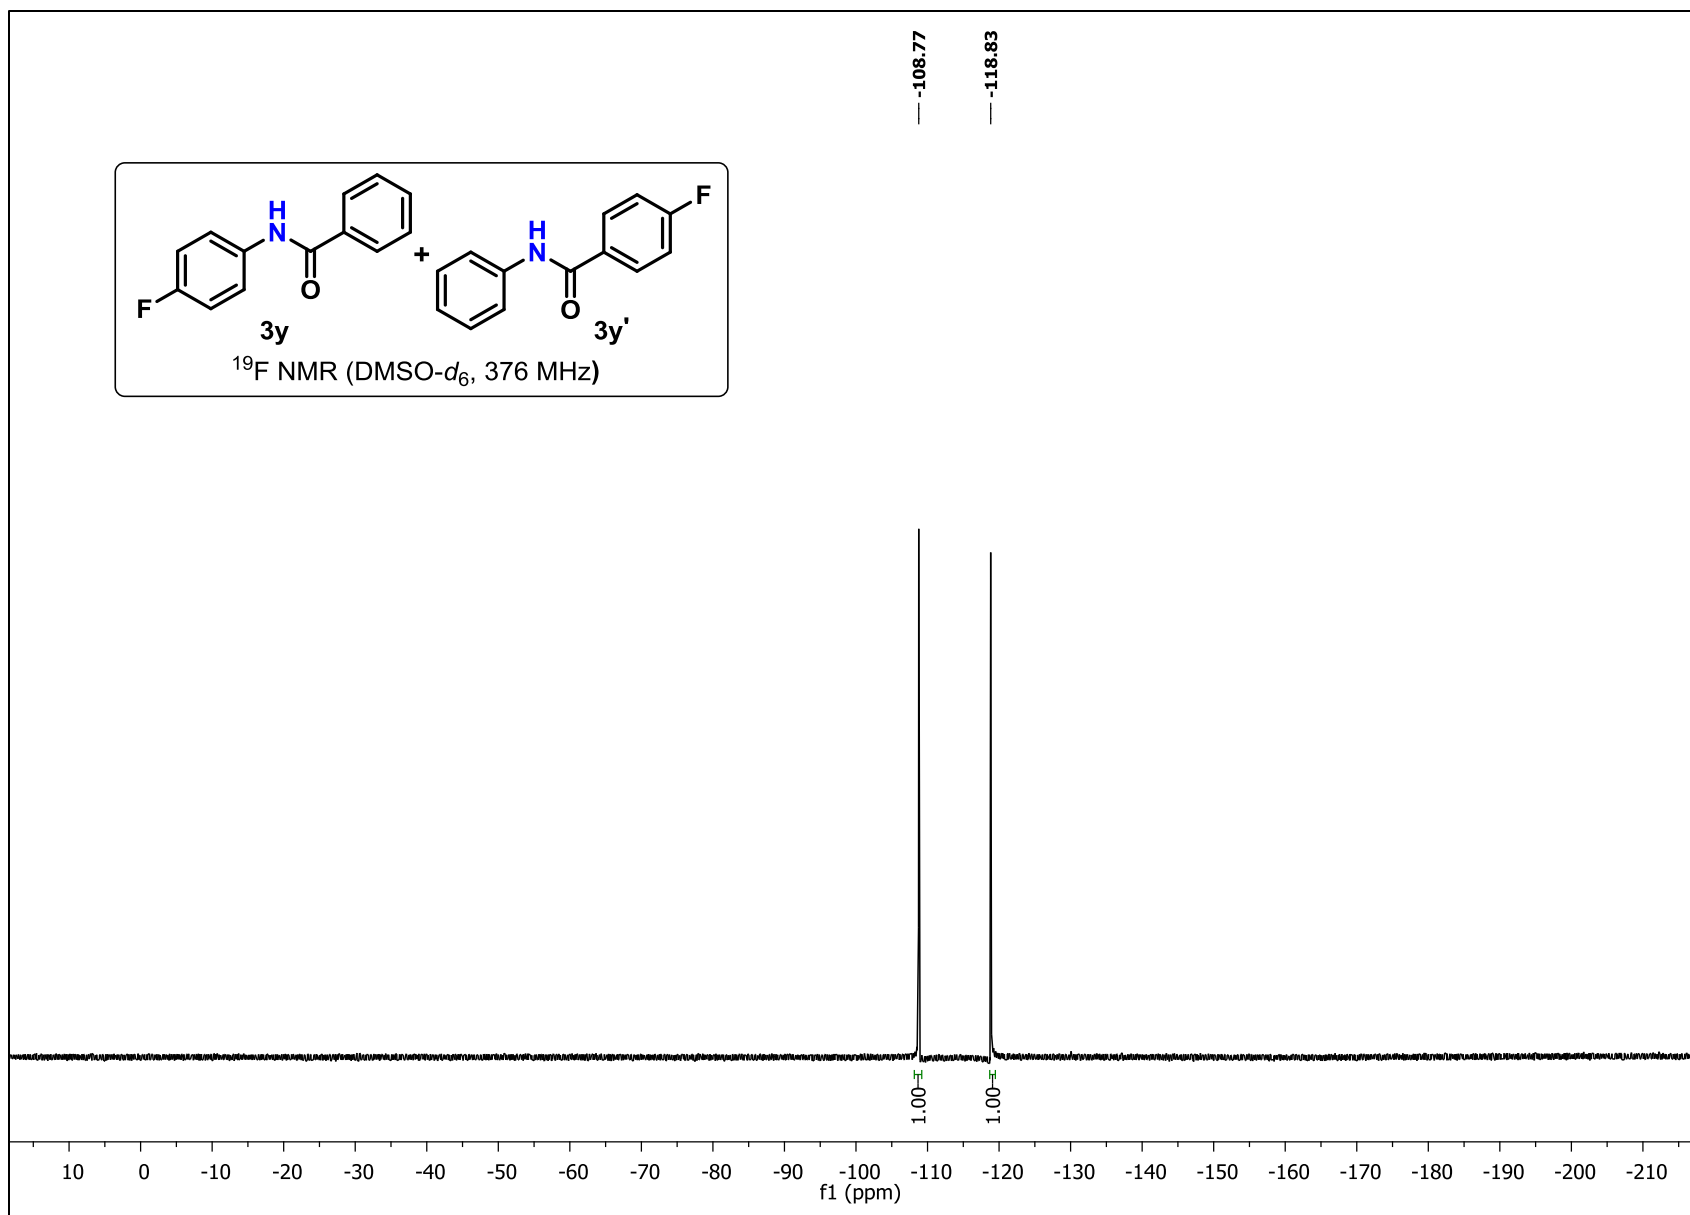

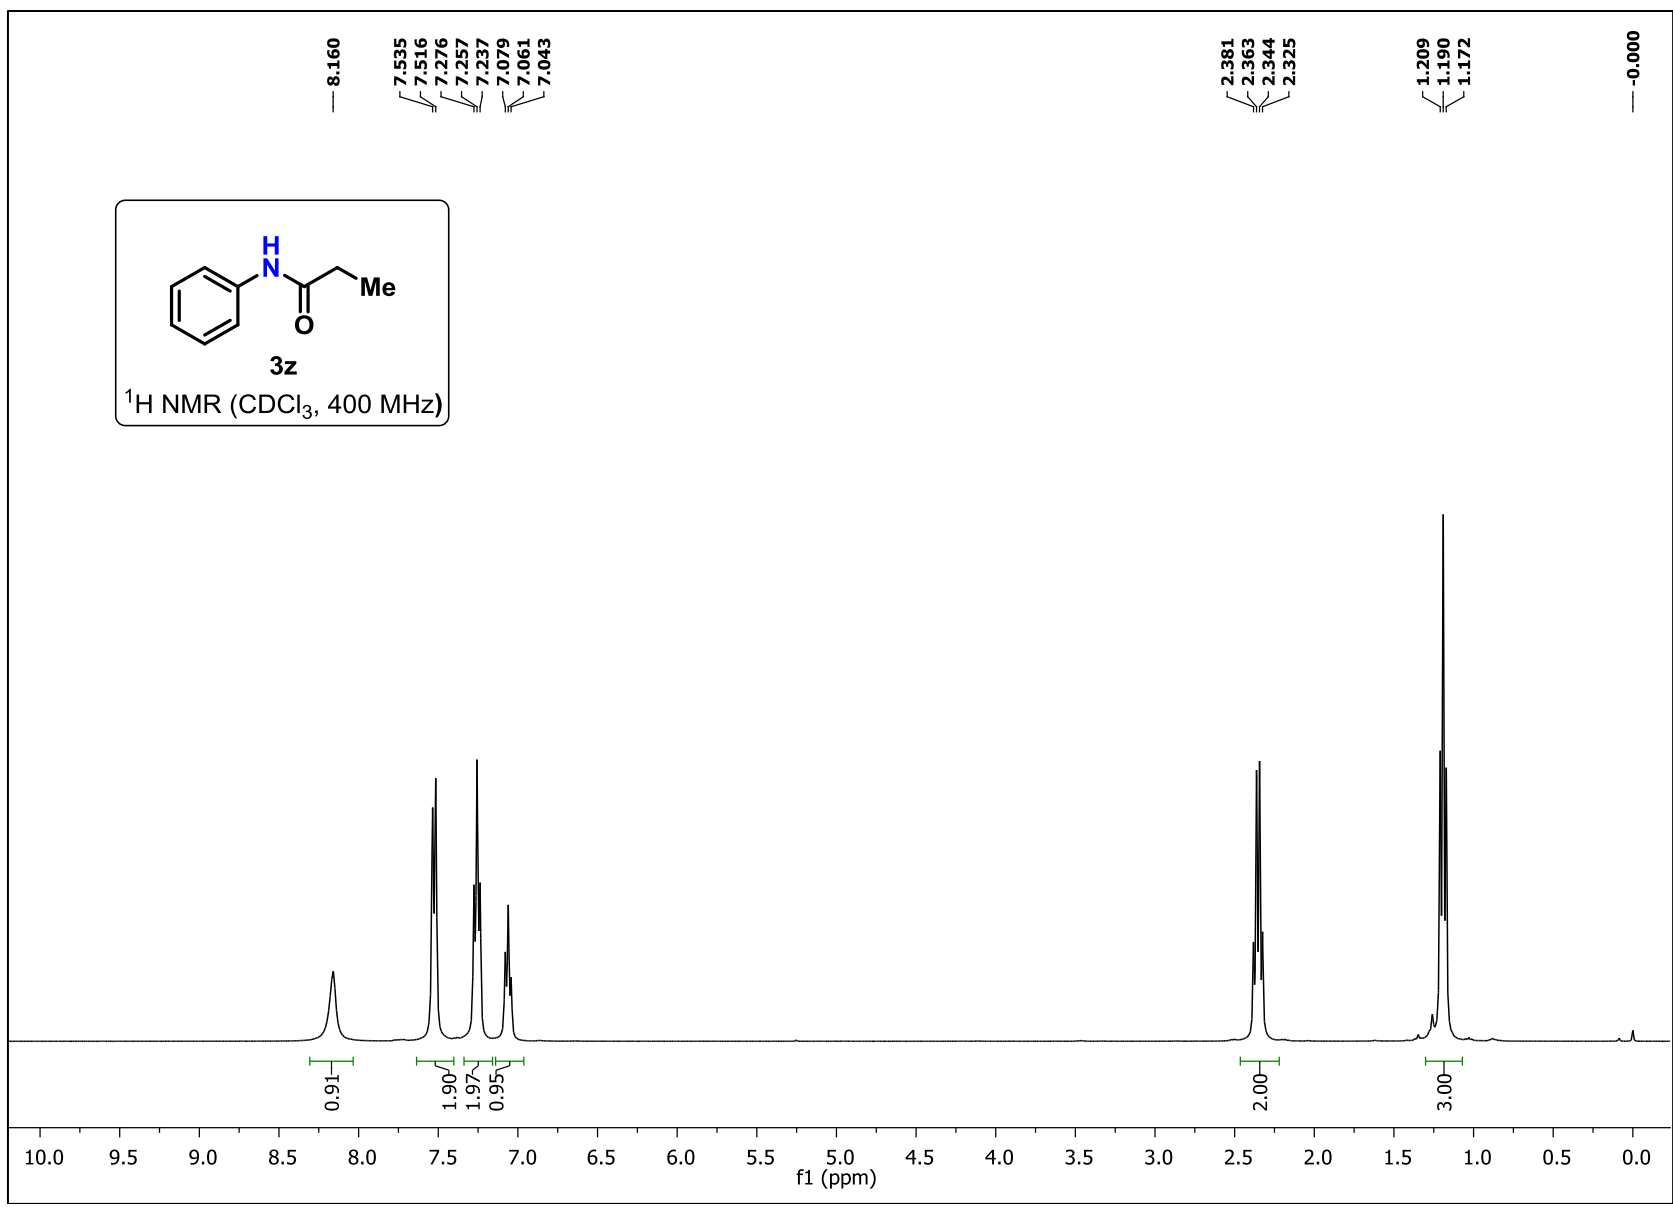

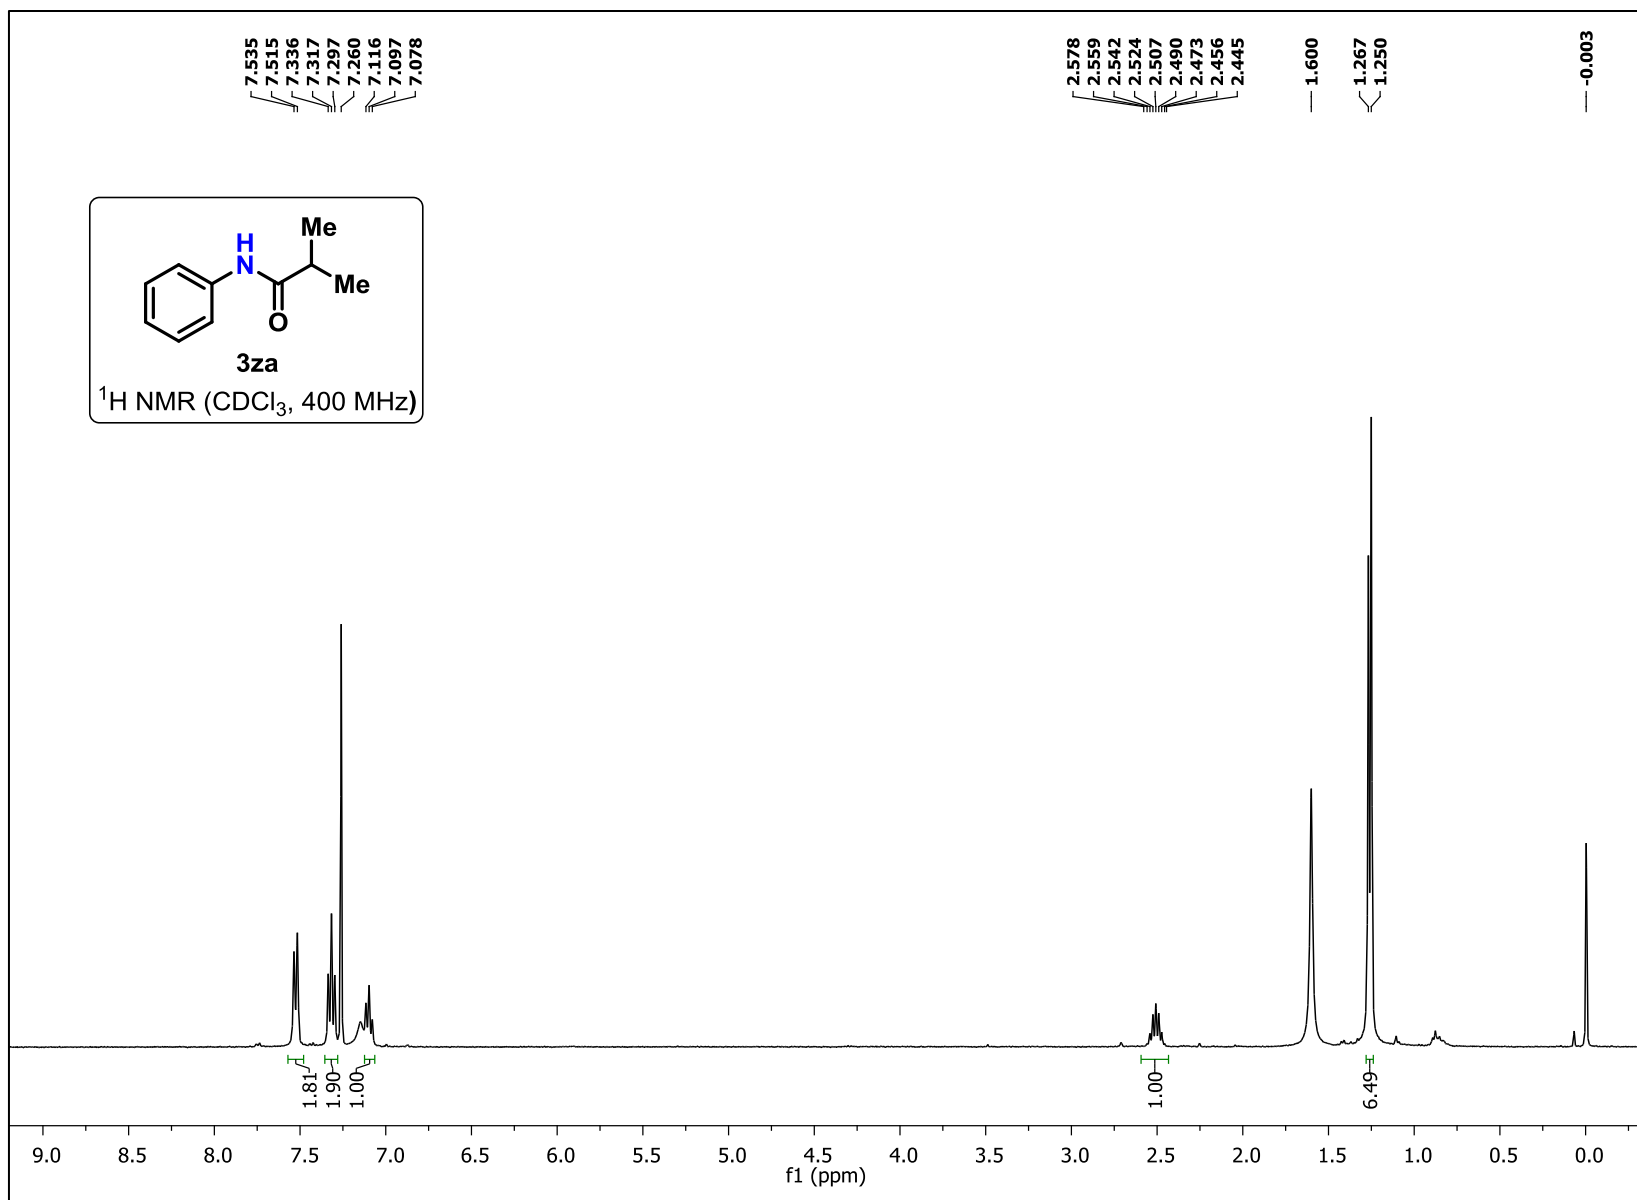

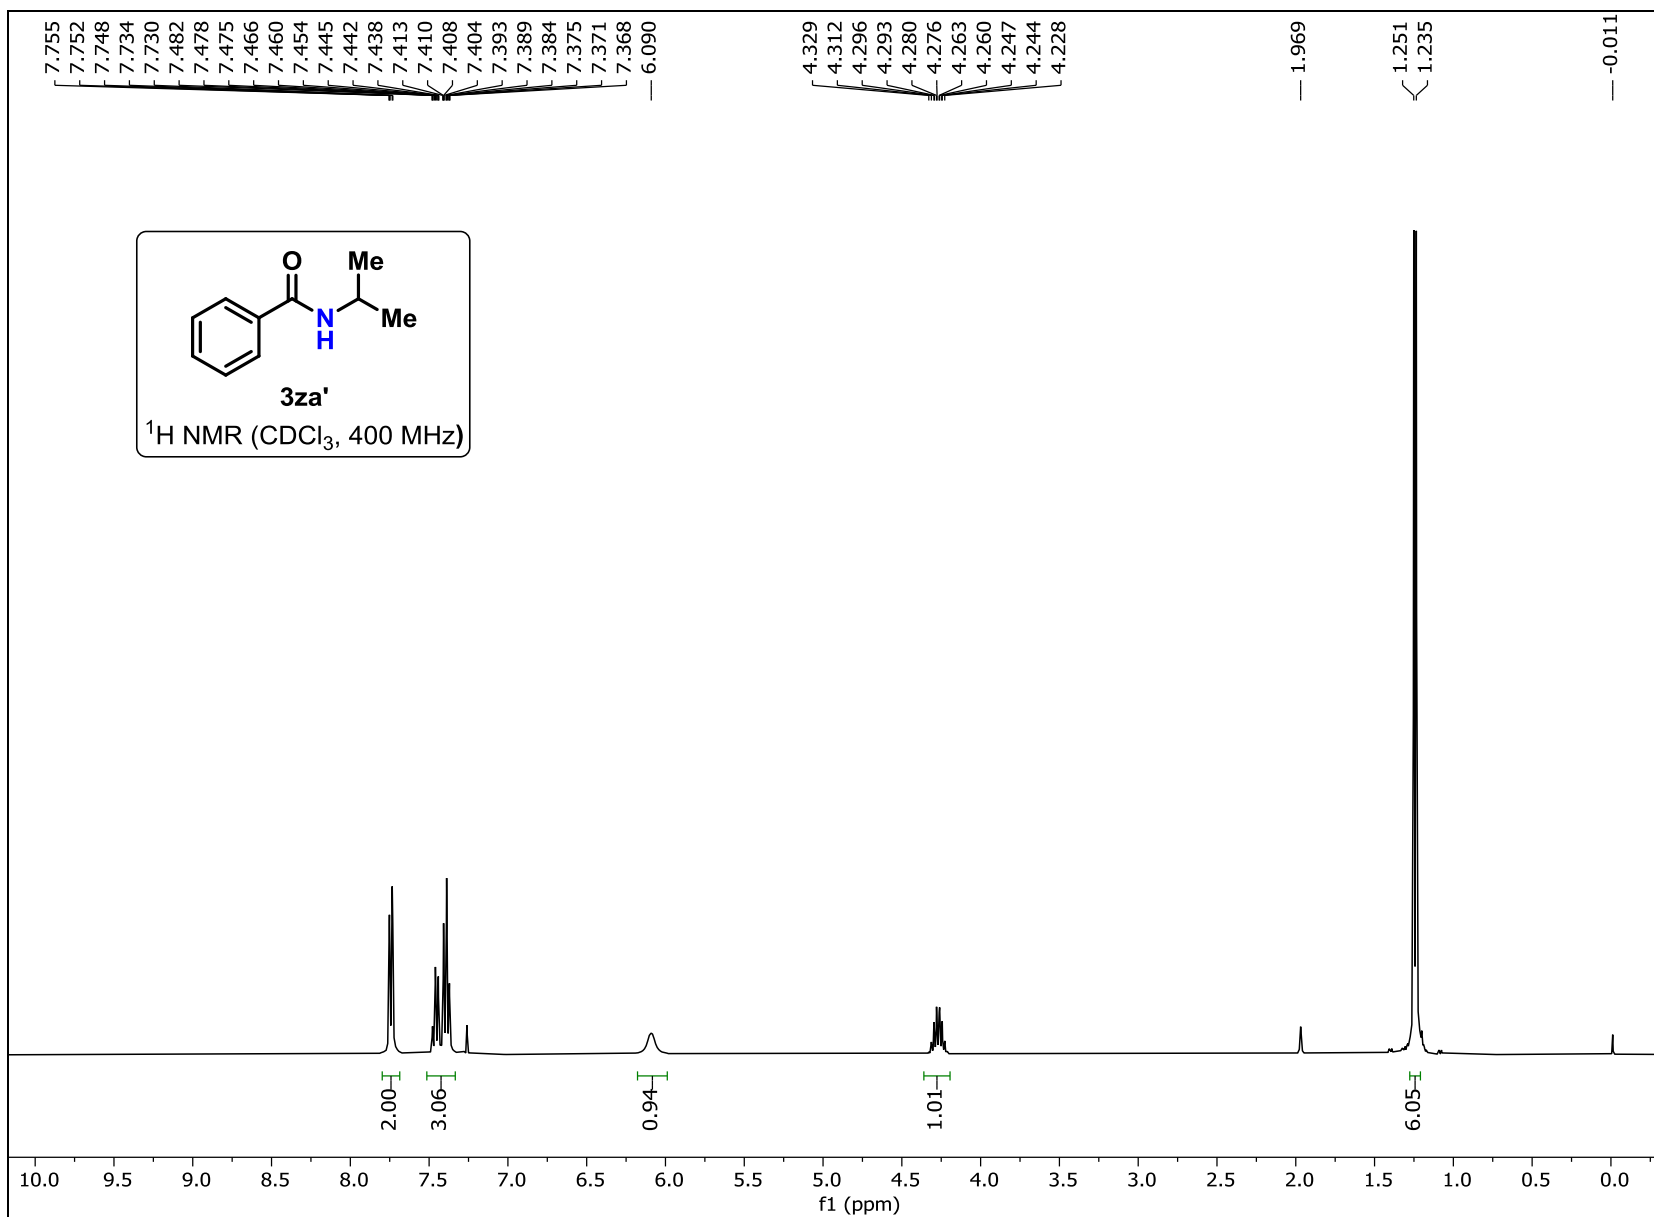

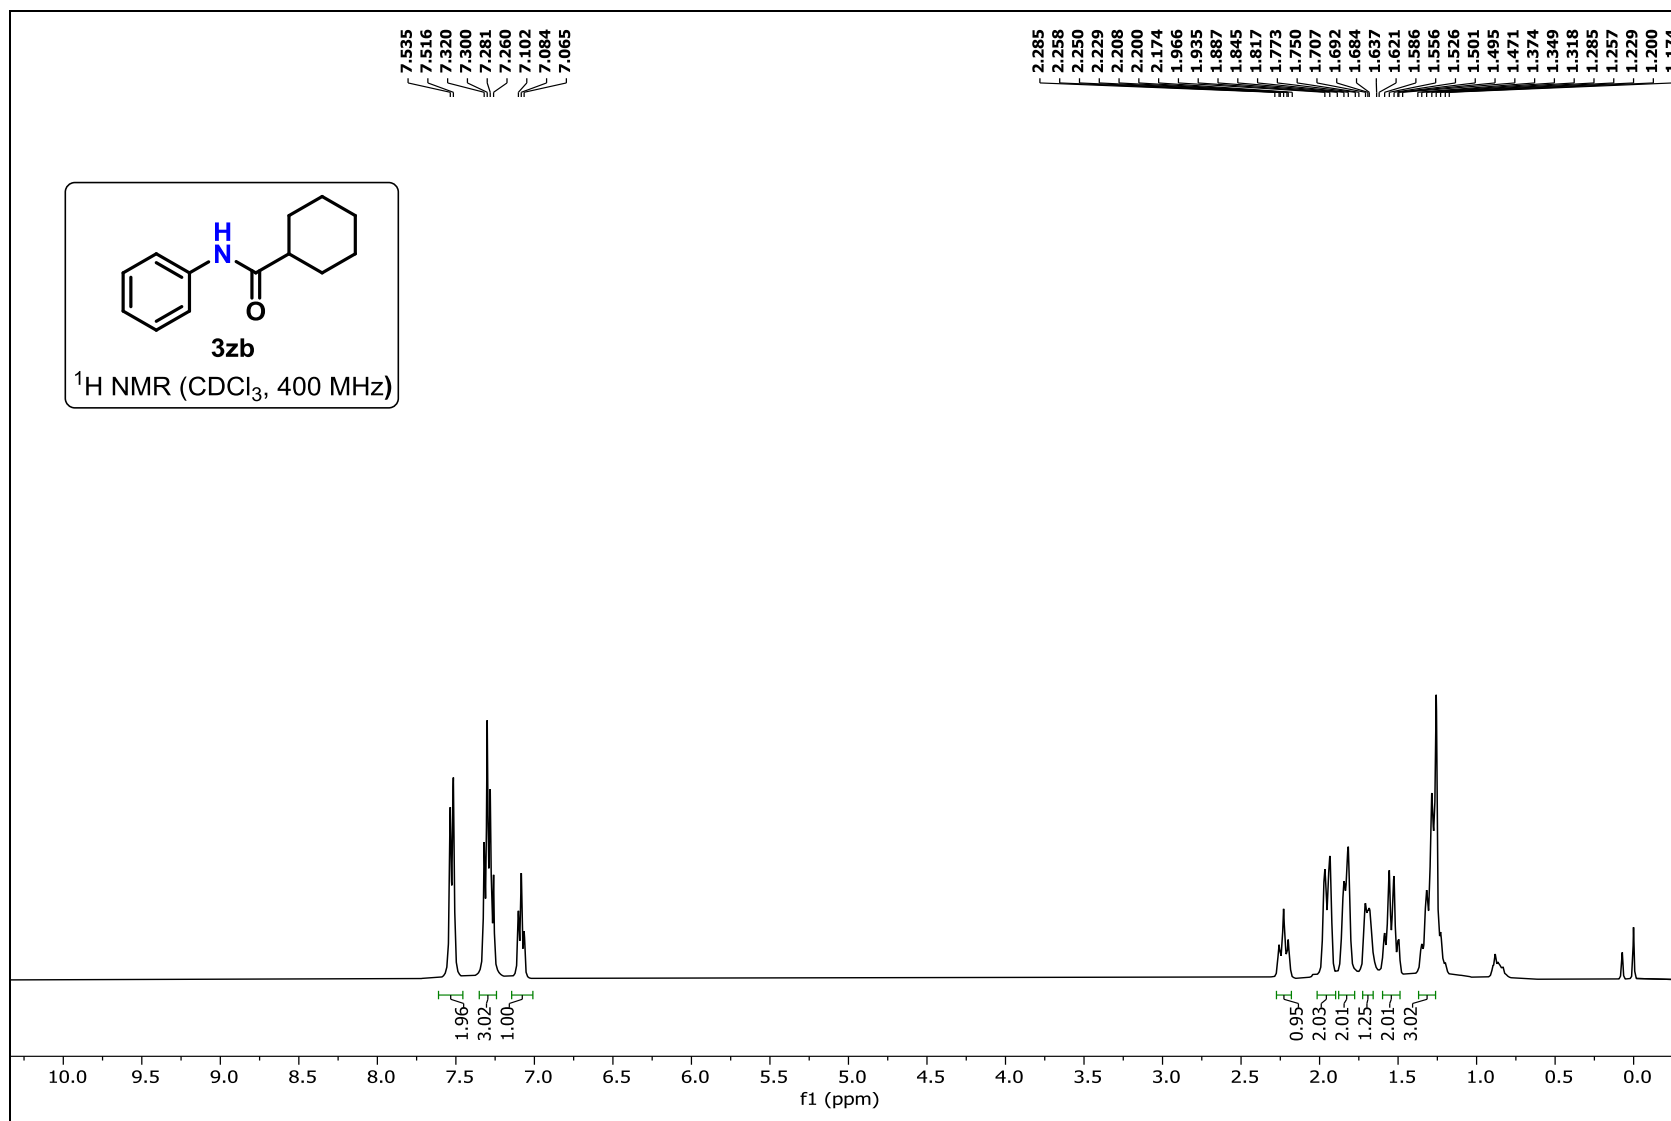

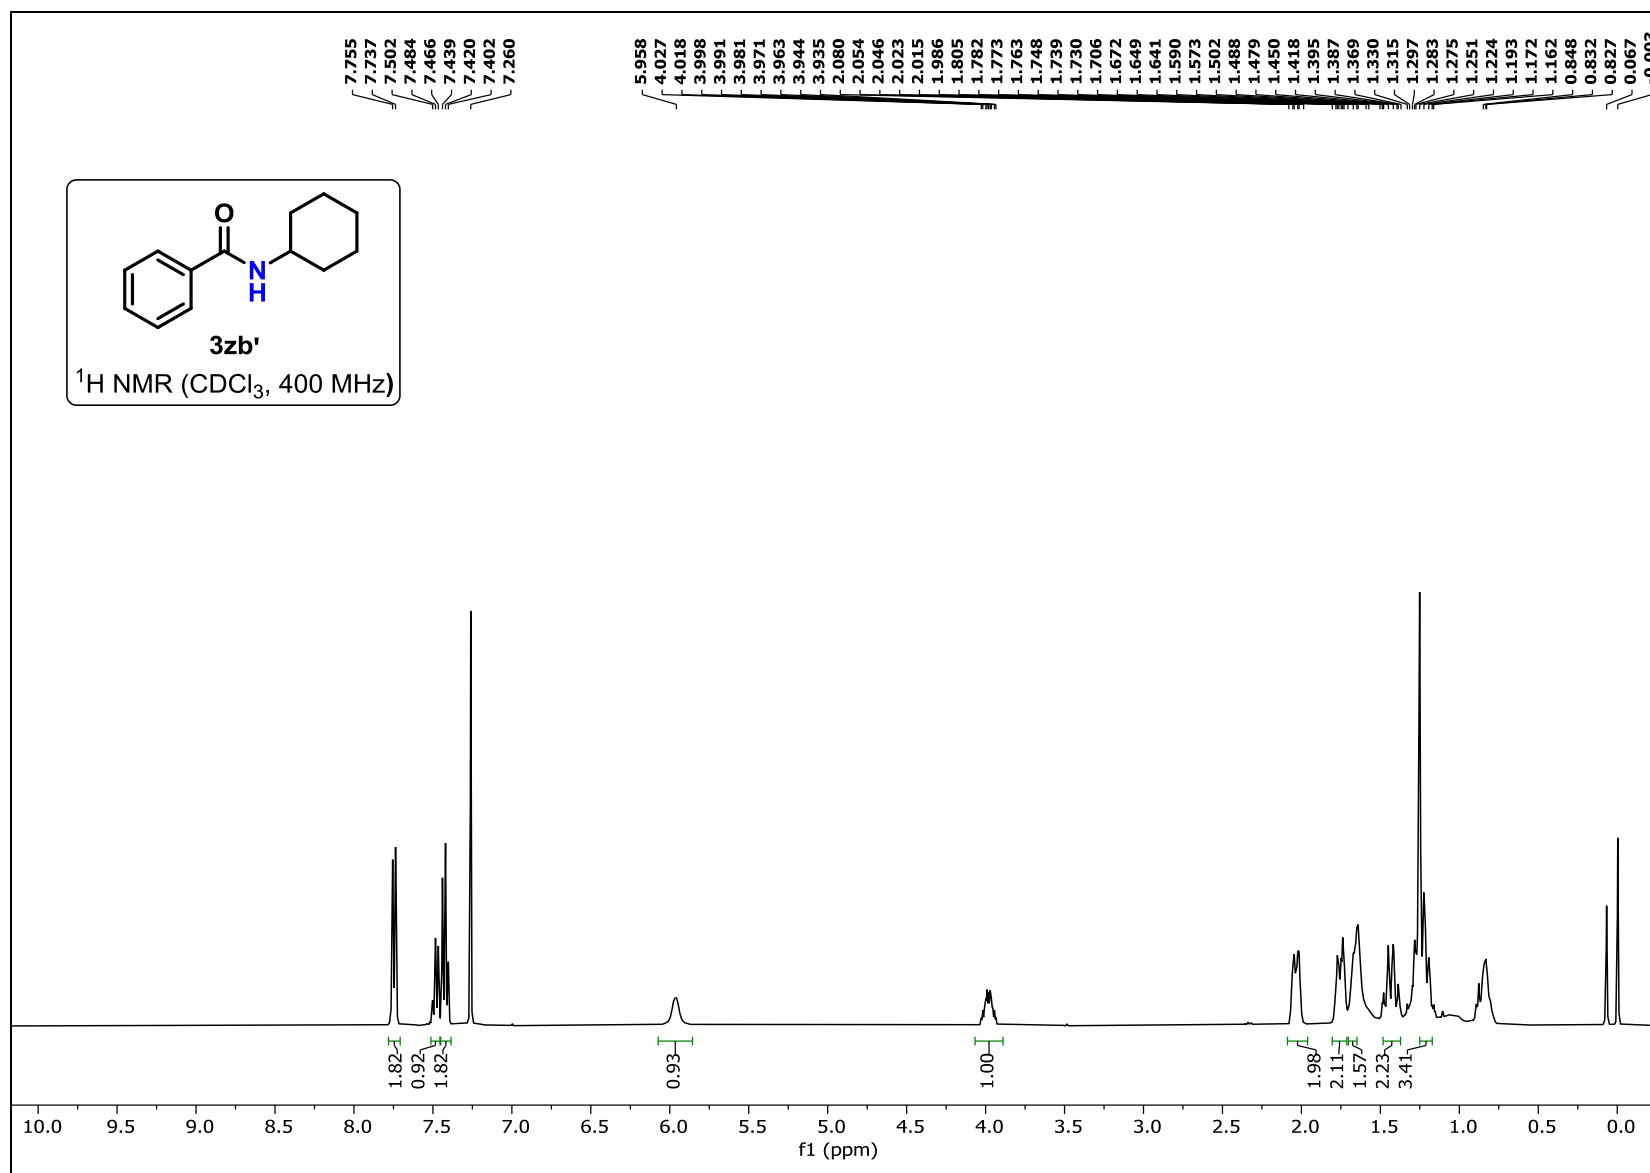

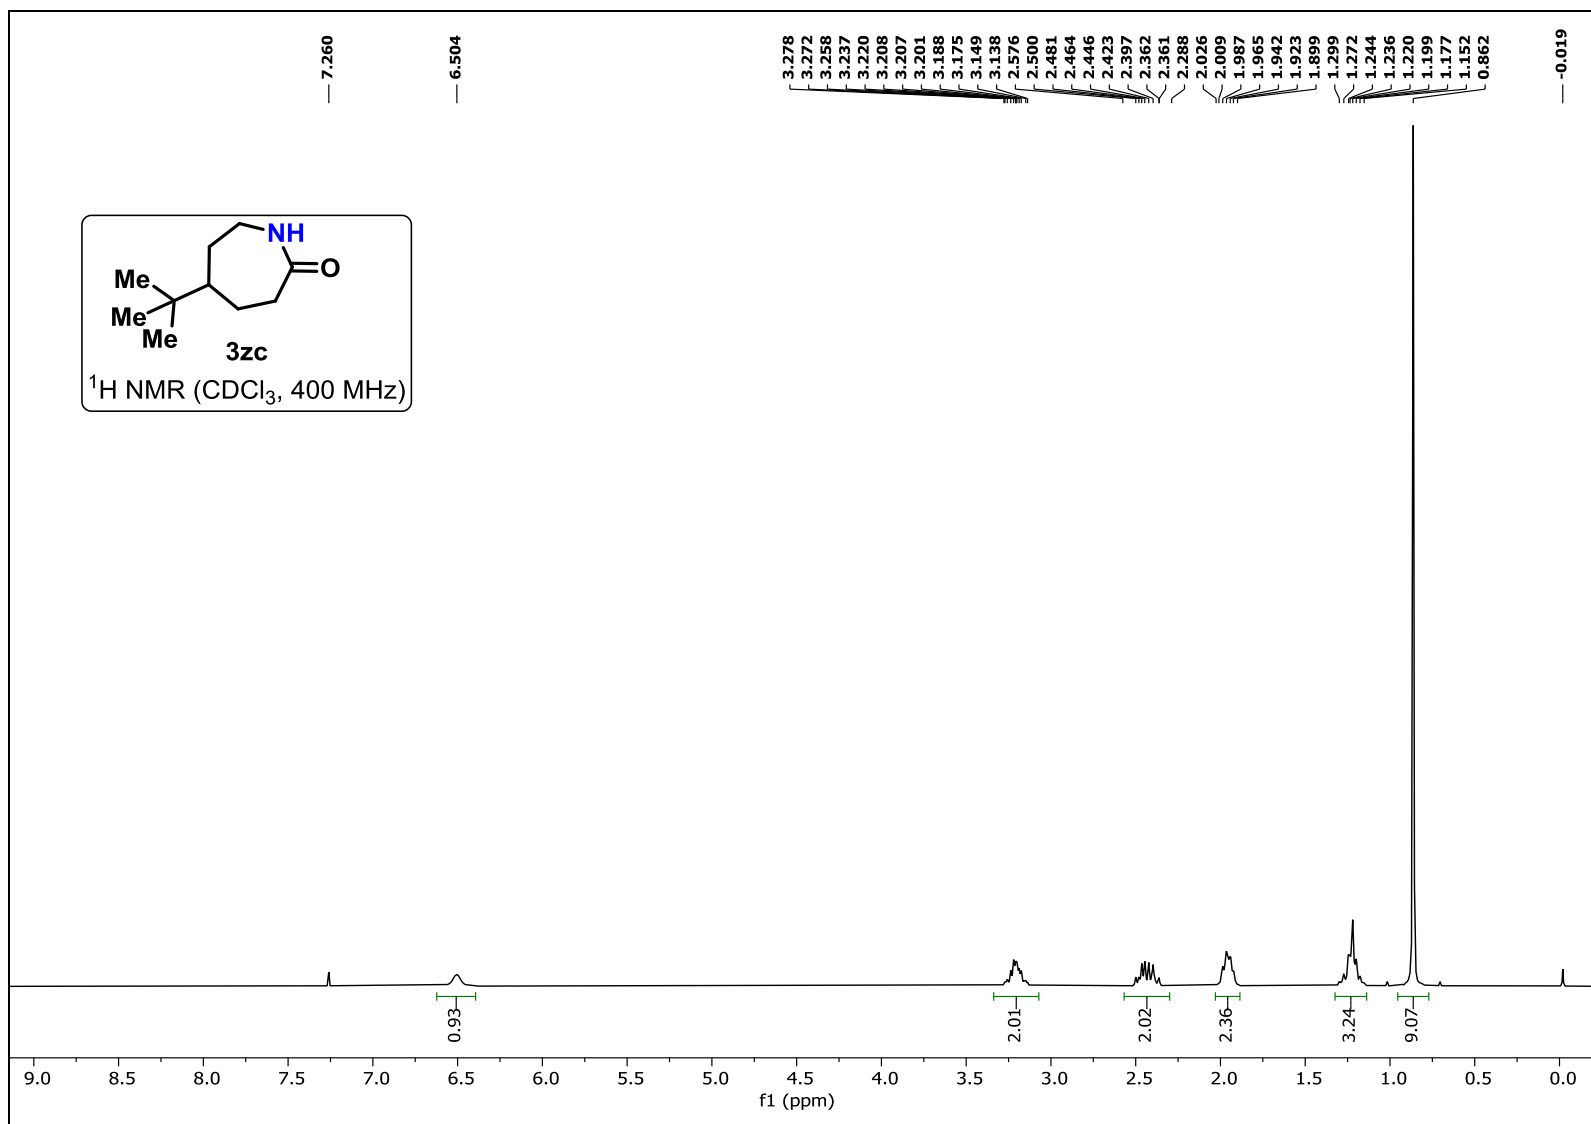

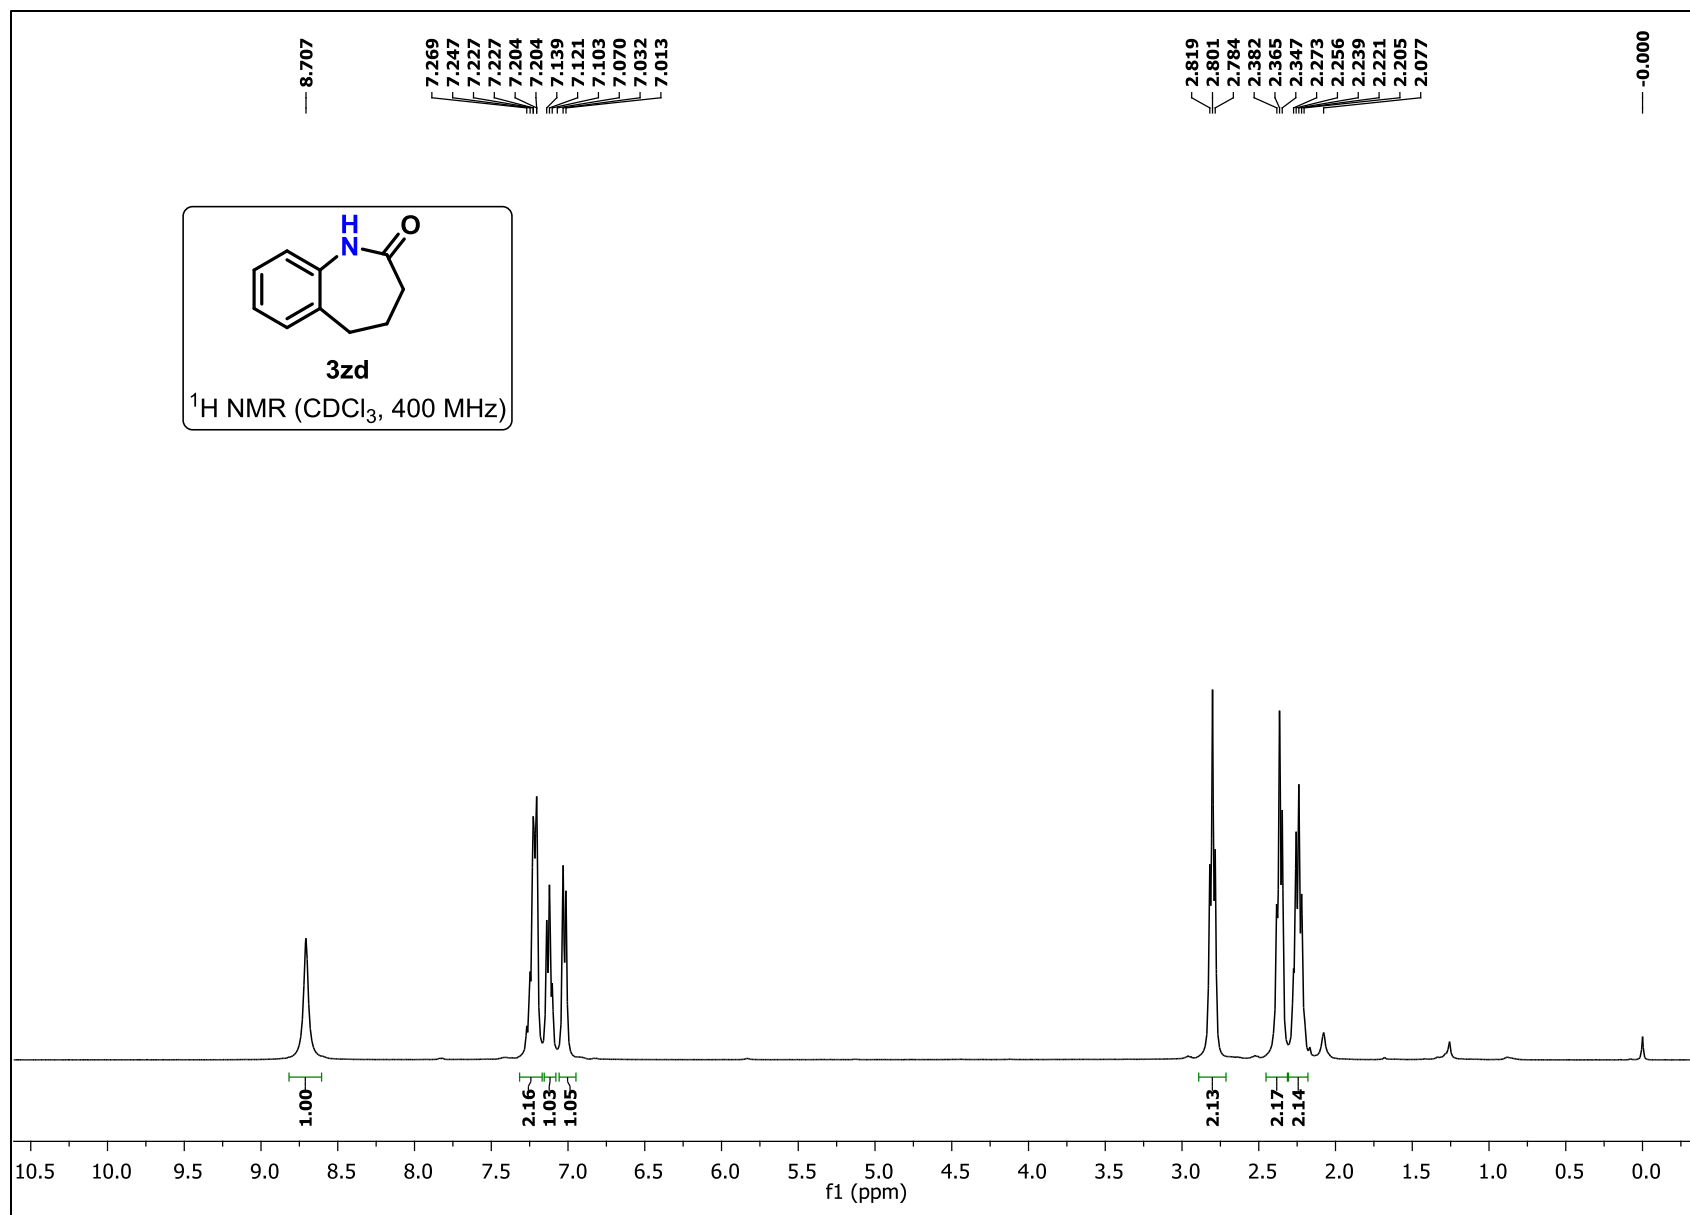



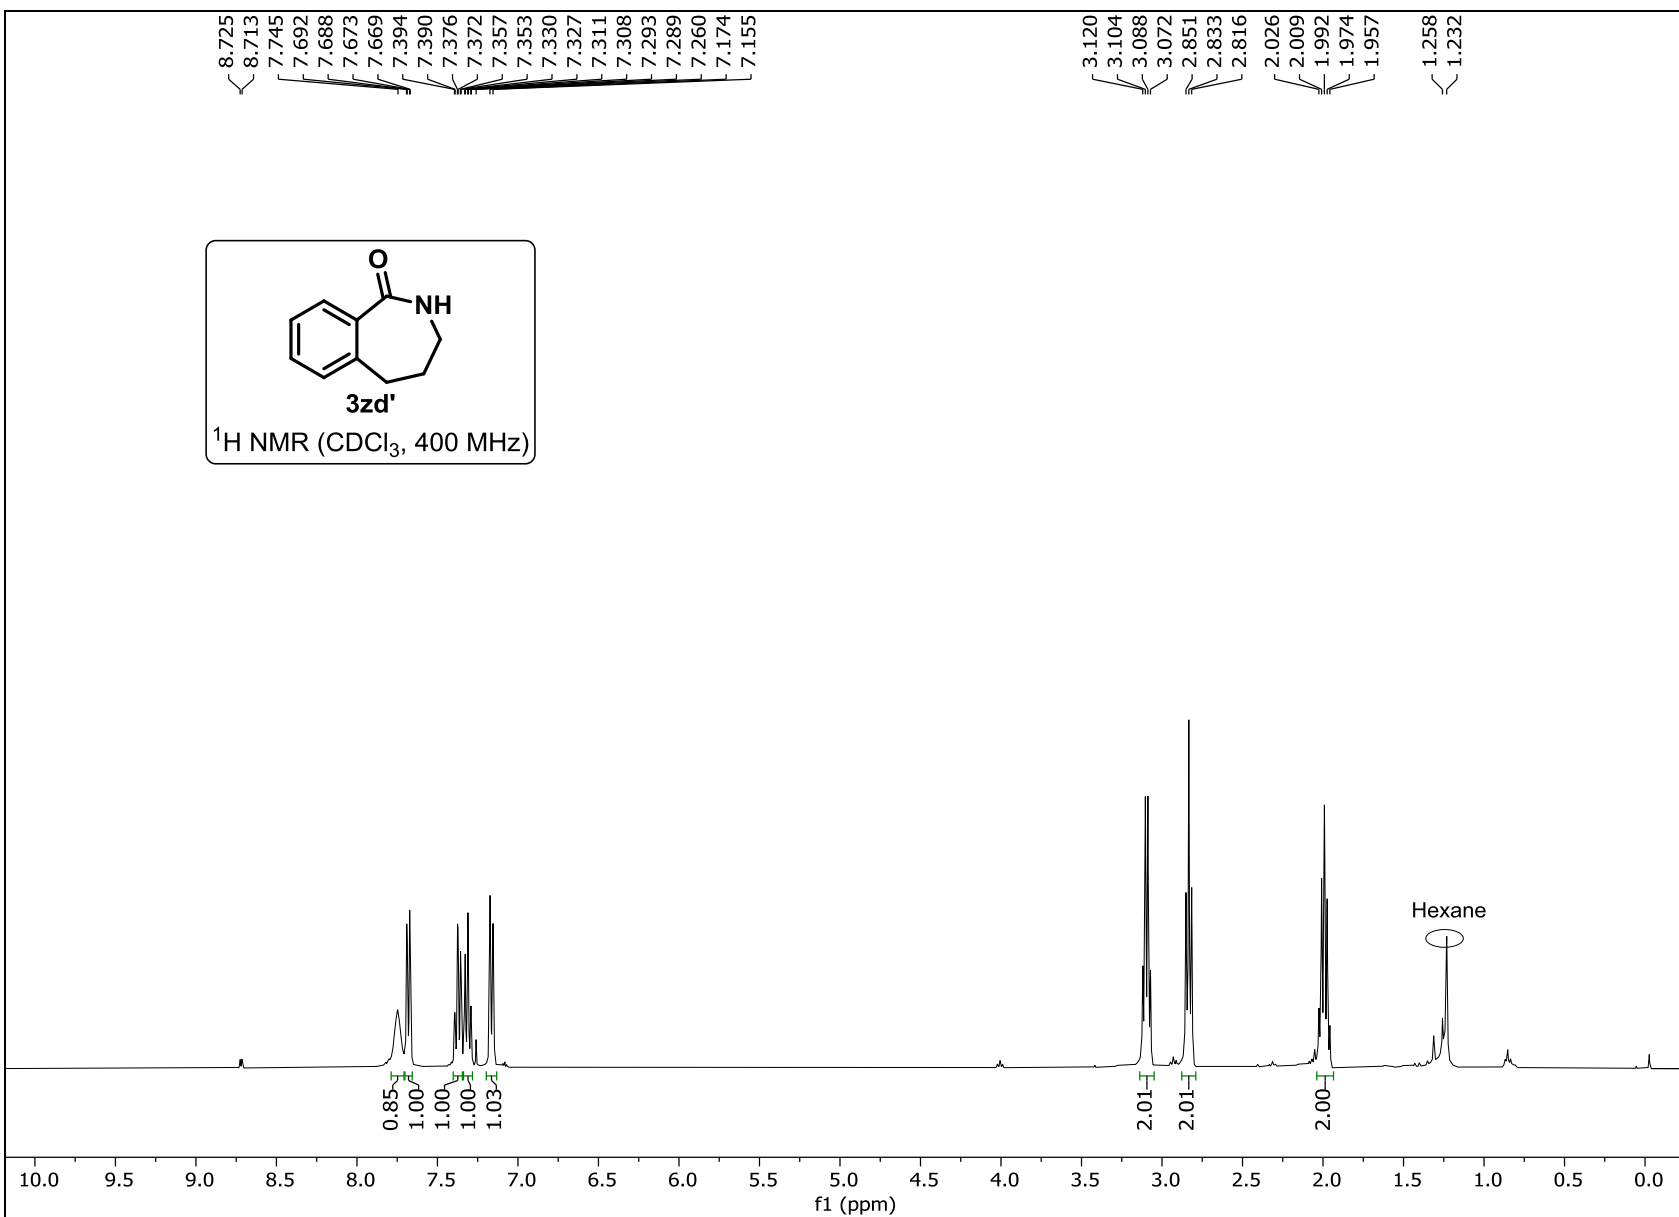

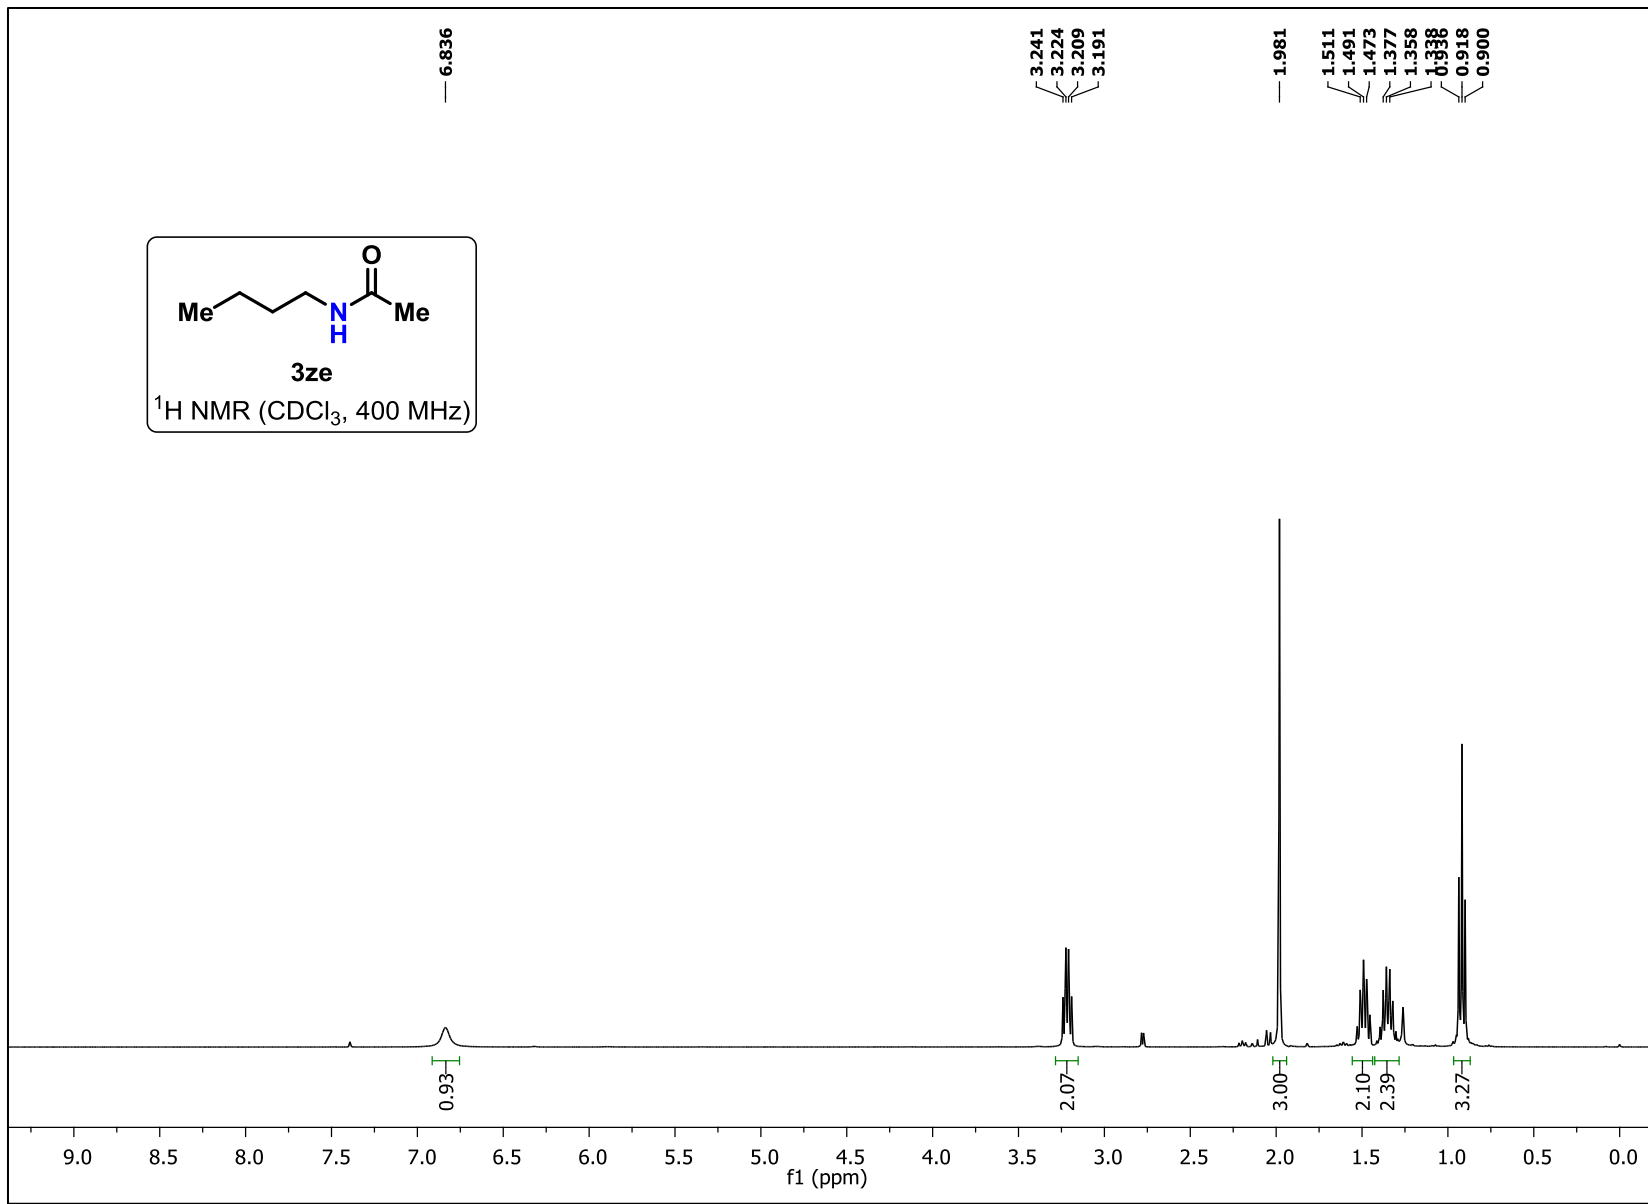

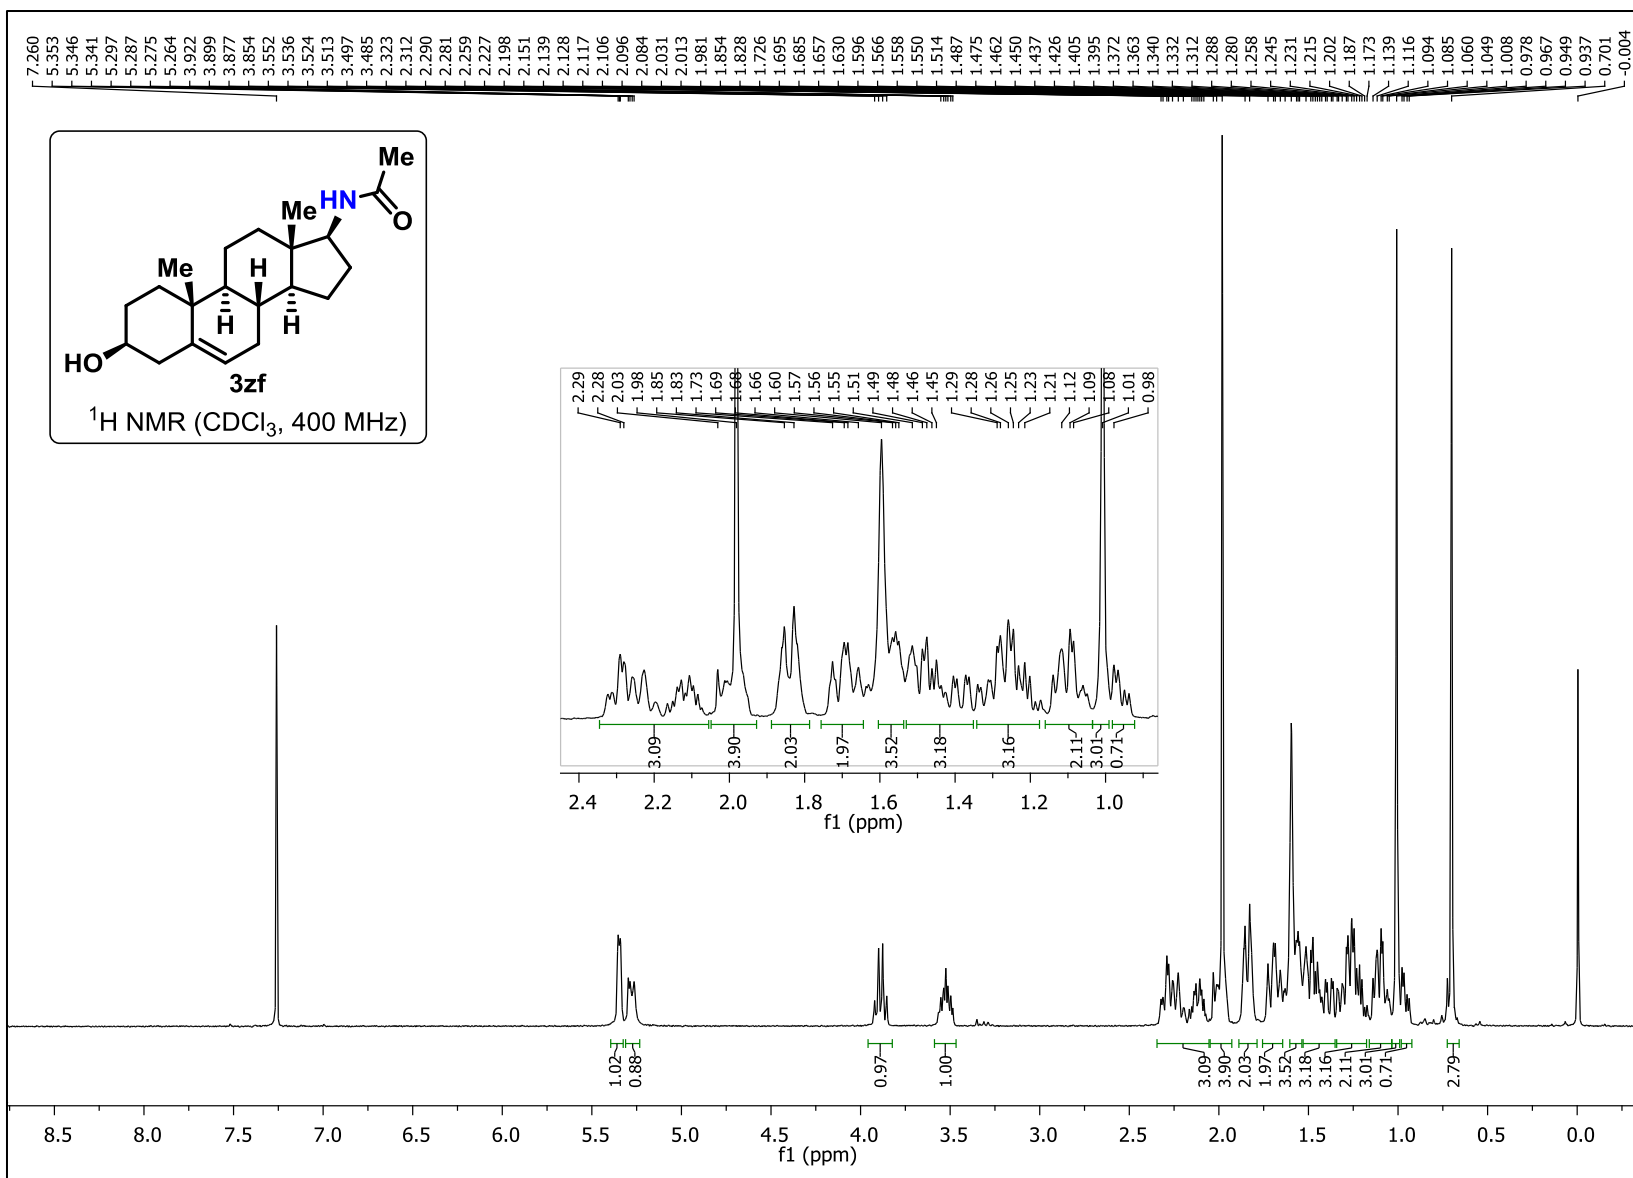

Supplement: d2nj02755k1.pdf [file d2nj02755k1.pdf]
